# Supplementary material for: A new high-resolution pollen sequence at Lake Van, Turkey: Insights into penultimate interglacial-glacial climate change on vegetation history
Source: Copernicus journal article supplement (doi:10.5194/cp-2016-133), 2016-12-19
Supplement: Supplementary file [file cp-2016-133-AC1-supplement.zip]

**Table 1:** Present-day climate data at Lake Van (see Fig. 1 for the location). Data were provided by the Turkish State Meteorological Service (observation period: 1975-2008).

| Station | Coordinates   |                |                  | Mean temperature (°C) |      |      | Mean precipitation (mm) |      |      |
|---------|---------------|----------------|------------------|-----------------------|------|------|-------------------------|------|------|
|         | Latitude (°N) | Longitude (°E) | Altitude (m asl) | Jan                   | July | Year | Jan                     | July | Year |
| Bitlis  | 38°24'        | 42°06'         | 1551             | -2.0                  | 22.0 | 9.4  | 161                     | 5    | 1232 |
| Tatvan  | 38°30'        | 42°17'         | 1690             | -3.2                  | 21.9 | 8.7  | 95                      | 7    | 816  |
| Erciş   | 39°20'        | 43°22'         | 1750             | -6.0                  | 21.8 | 7.7  | 31                      | 7    | 421  |
| Van     | 38°27'        | 43°19'         | 1661             | -4.0                  | 22.2 | 9.0  | 35                      | 4    | 385  |
