# Supplementary material for: A new high-resolution pollen sequence at Lake Van, Turkey: Insights into penultimate interglacial-glacial climate change on vegetation history
Source: Copernicus journal article supplement (doi:10.5194/cp-2016-133), 2016-12-19
Supplement: Supplementary file [file cp-2016-133-AC1-supplement.zip]

| PAS  | PAZ | Composite depth (mcbf) | Age (ka BP)     | Criteria for lower boundary                  | Main palynological characteristics (minimum – maximum in %)                                                                                                                                                                                                                                                                                                                                                                                                                   | Dominant vegetation type                                                            | MIS |
|------|-----|------------------------|-----------------|----------------------------------------------|-------------------------------------------------------------------------------------------------------------------------------------------------------------------------------------------------------------------------------------------------------------------------------------------------------------------------------------------------------------------------------------------------------------------------------------------------------------------------------|-------------------------------------------------------------------------------------|-----|
| IIIc | 6   | 57.10 - 58.09          | 128.8 – 131.21  | Occurrence <i>Pistacia</i>                   | <b>AP:</b> <i>Betula</i> (2-4%), dec. <i>Quercus</i> (1-13%), <i>Ephedra distachya</i> -type (0-3%), <i>Ulmus</i> (0-2%), <i>Juniperus</i> (0-1%), <i>Pinus</i> (0-1%), <i>Pistacia</i> cf. <i>atlantica</i> (0-1%)<br><b>NAP:</b> <i>Artemisia</i> (16-49%), Poaceae (7-25%), Chenopodiaceae (2-52%)<br><b>GA:</b> Low <b>DC:</b> Low <b>CC:</b> Moderate to high                                                                                                            | Steppe taxa become less widespread, giving way to open grassland                    | 5e  |
| IV   | 1   | 58.09 - 63.25          | 131.21 - 139.87 | Chenopodiaceae >40%                          | <b>AP:</b> Low AP (2-8%); increased frequencies of <i>Ephedra distachya</i> -type (1-5%); dec. <i>Quercus</i> , <i>Betula</i> , <i>Pinus</i> , and <i>Juniperus</i> are abundant at low level<br><b>NAP:</b> Chenopodiaceae (39-64%) show high values at the top, while <i>Artemisia</i> (8-29%) abundances decline; moderate Poaceae percentages<br><b>GA:</b> Low <b>DC:</b> Low <b>CC:</b> Low to moderate                                                                 | Open desert steppe vegetation                                                       | 6   |
|      | 2   | 63.25 - 71.50          | 139.87 - 150.14 | Chenopodiaceae <40%                          | <b>AP:</b> Low AP (1-7%); temperate trees are present at low level<br><b>NAP:</b> Expansion of <i>Artemisia</i> continues and peaks in the middle of the zone (54%); Chenopodiaceae percentages drop to 15-41%; moderate Poaceae values (11-34%)<br><b>GA:</b> Low with a single peak at 146.4 ka (c. 3,700 coenobia cm <sup>-3</sup> ) <b>DC:</b> Low <b>CC:</b> Low                                                                                                         | Productive dwarf shrub steppe vegetation                                            |     |
|      | 3   | 71.50 - 77.72          | 150.14 - 162.49 | Chenopodiaceae >40%; decrease <i>Quercus</i> | <b>AP:</b> Dec. <i>Quercus</i> , <i>Betula</i> , <i>Pinus</i> , and <i>Juniperus</i> are continuously present at low level (AP 2-8%); increase of <i>Ephedra distachya</i> -type (1-6%)<br><b>NAP:</b> Predominance of Chenopodiaceae (33-62%); <i>Artemisia</i> (6-38%) shows moderate values with increasing trend towards the top, Poaceae continuously present at ~13%<br><b>GA:</b> High to low at the end of the zone <b>DC:</b> Low to high <b>CC:</b> Low to moderate | Open desert steppe vegetation                                                       |     |
|      | 4   | 77.72 - 83.84          | 162.49 - 173.38 | Chenopodiaceae <40%; increase <i>Quercus</i> | <b>AP:</b> Low AP (1-14%); moderate dec. <i>Quercus</i> (0-3%); decrease of <i>Betula</i> (0-2%), while <i>Pinus</i> (0-5%) and <i>Juniperus</i> (0-1%) percentages increase towards at the top<br><b>NAP:</b> Predominance of <i>Artemisia</i> (10-46%) and Poaceae (8-54%); Chenopodiaceae abundances (5-40%) are reduced<br><b>GA:</b> Low to high <b>DC:</b> Low <b>CC:</b> Low with moderate peaks                                                                       | Fluctuation between open desert-steppe and grassland scattered with temperate trees |     |
|      | 5   | 83.84 - 93.51          | 173.38 - 185.74 | Chenopodiaceae >40%                          | <b>AP:</b> AP (1-9%) decrease continuously throughout the zone; mainly by dec. <i>Quercus</i> (0-4%)<br><b>NAP:</b> Base marked by a pronounced expansion of Chenopodiaceae (33-64%); <i>Artemisia</i> continues from previous zone with max. 32%, while Poaceae decrease (3-18%)<br><b>GA:</b> Low <b>DC:</b> Low to high towards the top <b>CC:</b> Low                                                                                                                     | Change from grassland to desert steppe vegetation at the end of the zone            |     |
|      | 6   | 93.51 - 97.02          | 185.74 - 193.36 | Decrease                                     | <b>AP:</b> Reduction of AP; still abundant: dec. <i>Quercus</i> (1-31%), <i>Betula</i> (0-                                                                                                                                                                                                                                                                                                                                                                                    | Open grasslands with scattered                                                      |     |

| PAS | PAZ | Composite depth<br>(mcbf) | Age (ka BP)     | Criteria for<br>lower boundary                     | Main palynological characteristics (minimum – maximum in %)                                                                                                                                                                                                                                                                                                                                                                                                                                                                                                                                       | Dominant vegetation type                                                                                                    | MIS |
|-----|-----|---------------------------|-----------------|----------------------------------------------------|---------------------------------------------------------------------------------------------------------------------------------------------------------------------------------------------------------------------------------------------------------------------------------------------------------------------------------------------------------------------------------------------------------------------------------------------------------------------------------------------------------------------------------------------------------------------------------------------------|-----------------------------------------------------------------------------------------------------------------------------|-----|
|     |     |                           |                 | <i>Quercus</i> ;<br>increase Poaceae               | 2%), and <i>Ulmus</i> (<1%); moderate conifer trees with small oscillations;<br>disappearance of <i>Pistacia</i> cf. <i>atlantica</i><br><b>NAP:</b> Increase of Poaceae (21-45%); steppic herbs continue to be moderate<br><b>GA:</b> Low <b>DC:</b> Low <b>CC:</b> Low to moderate, peak at 189.4 ka                                                                                                                                                                                                                                                                                            | temperate trees                                                                                                             |     |
| Va  | 1   | 97.02 - 99.88             | 193.36 - 203.11 | Increase AP;<br>peak <i>Pistacia</i>               | <b>AP:</b> High AP (24-44%), e.g., dec. <i>Quercus</i> (8-38%), increasing values of <i>Betula</i> (0-4%), <i>Pinus</i> (0-3%), and <i>Juniperus</i> (0-3%); peak of <i>Pistacia</i> cf. <i>atlantica</i> (c. 3%) at the beginning; high tree concentration (>3,000 grains cm <sup>-3</sup> )<br><b>NAP:</b> Moderate percentages of steppic herbs ( <i>Artemisia</i> 13-29% and Chenopodiaceae 11-33%) with significant peak of NAP (85%) near the base<br><b>GA:</b> Low <b>DC:</b> Low <b>CC:</b> Low to moderate with one single high peak at 201.3 ka (>5,000 particles cm <sup>-3</sup> )   | Expansion of oak steppe-forest along with Mediterranean taxa ( <i>Pistacia</i> ), short-term influence of steppe vegetation | 7a  |
|     | 2   | 99.88 - 101.30            | 203.11 - 207.56 | AP <40%;<br>decrease<br><i>Quercus</i>             | <b>AP:</b> Reduced AP values (17-50%) mainly by dec. <i>Quercus</i> (10-30%) and <i>Pinus</i> (1-8%) but still above 15%; increase of <i>Ephedra distachya</i> -type (1-3%) and <i>Betula</i> (0-2%)<br><b>NAP:</b> Expansion of Chenopodiaceae (15-47%), peak of <i>Artemisia</i> (9-32%) at the beginning; moderate Poaceae (5-19%)<br><b>GA:</b> Low <b>DC:</b> Low to high <b>CC:</b> Low to moderate                                                                                                                                                                                         | More open (steppe) landscape with still patchy pioneer & temperate tree                                                     | 7b  |
|     | 3   | 101.30 - 104.19           | 207.56 - 216.28 | Chenopodiaceae<br><40%; increase<br><i>Quercus</i> | <b>AP:</b> Predominance of dec. <i>Quercus</i> (2-56%) with significant peak at 102.8 mcbf (212.6 ka) followed by a decreasing trend; high values of <i>Pinus</i> (0-19%); <i>Betula</i> (0-4%) and <i>Juniperus</i> (0-2%) are abundant; <i>Pistacia</i> cf. <i>atlantica</i> and <i>Ulmus</i> pollen occur sporadically; high AP concentration (>3,000 grains cm <sup>-3</sup> )<br><b>NAP:</b> Peak of <i>Artemisia</i> (6-38%), Poaceae (5-21%), and Tubuliflorae (2-13%) at the beginning; very low Chenopodiaceae values (4-48%)<br><b>GA:</b> Low <b>DC:</b> No occurrence <b>CC:</b> High | Expansion of oak-pine steppe-forest                                                                                         | 7c  |
| Vb  |     | 104.19 - 109.05           | 216.28 - 227.42 | Chenopodiaceae<br>>40%                             | <b>AP:</b> Very low AP percentages (1-12%) and concentration (<2,000 grains cm <sup>-3</sup> ); decrease of dec. <i>Quercus</i> (0-9%), <i>Pinus</i> (0-3%), and <i>Juniperus</i> (<1%)<br><b>NAP:</b> Predominance of Chenopodiaceae (37-76%); Poaceae (4-15%), and <i>Artemisia</i> (6-26%) are abundant<br><b>GA:</b> Low <b>DC:</b> Low <b>CC:</b> Low with moderate values at the end                                                                                                                                                                                                        | Extensive desert steppe vegetation                                                                                          | 7d  |
| Vc  | 1   | 109.05 - 109.94           | 227.42 - 230.71 | Disappearance                                      | <b>AP:</b> Decrease in AP (14-19%), mainly dec. <i>Quercus</i> (2-5%), <i>Pinus</i> (2-                                                                                                                                                                                                                                                                                                                                                                                                                                                                                                           | Increasing influence of steppe                                                                                              | 7e  |

| PAS | PAZ | Composite depth (mcbf) | Age (ka BP)     | Criteria for lower boundary                                         | Main palynological characteristics (minimum – maximum in %)                                                                                                                                                                                                                                                                                                                                                                                                                                               | Dominant vegetation type                                                                                              | MIS |
|-----|-----|------------------------|-----------------|---------------------------------------------------------------------|-----------------------------------------------------------------------------------------------------------------------------------------------------------------------------------------------------------------------------------------------------------------------------------------------------------------------------------------------------------------------------------------------------------------------------------------------------------------------------------------------------------|-----------------------------------------------------------------------------------------------------------------------|-----|
|     |     |                        |                 | <i>Pistacia</i> ; decrease AP, increase Chenopodiaceae              | 10%); <i>Pistacia</i> cf. <i>atlantica</i> disappears<br><b>NAP:</b> Strong increase in Chenopodiaceae (23-32%), reduced <i>Artemisia</i> (19-27 %) and Poaceae (18-26%)<br><b>GA:</b> Low <b>DC:</b> Low <b>CC:</b> Low                                                                                                                                                                                                                                                                                  | taxa, expansion of open vegetation                                                                                    |     |
|     | 2   | 109.94 - 111.73        | 230.71 - 236.95 | Decrease <i>Quercus</i> and <i>Pistacia</i> ; increase <i>Pinus</i> | <b>AP:</b> Percentages of dec. <i>Quercus</i> (6-21%), <i>Betula</i> (0-1% and <i>Pistacia</i> cf. <i>atlantica</i> decline while those of <i>Pinus</i> (4-26%) and <i>Juniperus</i> (2-5%) rise<br><b>NAP:</b> Increased steppic taxa, e.g., <i>Artemisia</i> (5-26%) and Poaceae (21-36%); still low Chenopodiaceae (3-13%)<br><b>GA:</b> High <b>DC:</b> Low <b>CC:</b> Low with one peak at the end                                                                                                   | All temperate tree taxa declined gradually, while <i>Pinus</i> and grassland expanded (Pinus-dominated steppe-forest) |     |
|     | 3   | 111.73 - 112.64        | 236.95 - 240.31 | <i>Quercus</i> >10%; Chenopodiaceae <40%                            | <b>AP:</b> Peak values for <i>Betula</i> (4-8%) and <i>Pistacia</i> cf. <i>atlantica</i> (1-2%), expansion of dec. <i>Quercus</i> (10-40%); <i>Pinus</i> (0-3%), <i>Juniperus</i> (0-1%), and <i>Ulmus</i> are abundant; highest AP concentration (c. 5,300-15,300 grains cm <sup>-3</sup> )<br><b>NAP:</b> Retreat in steppe percentages mainly <i>Artemisia</i> (13-37%) Chenopodiaceae (3-6%); moderate Poaceae values (12-20%)<br><b>GA:</b> Low <b>DC:</b> No occurrence <b>CC:</b> Moderate to high | Expansion of oak steppe-forest along with Mediterranean sclerophylls ( <i>Pistacia</i> )                              |     |
|     | 4   | 112.64 - 113.70        | 240.31 - 242.48 | Occurrence <i>Pistacia</i>                                          | <b>AP:</b> Increase in temperate AP, e.g., dec. <i>Quercus</i> (1-10%) and <i>Betula</i> (1-5%); occurrence of <i>Pistacia</i> cf. <i>atlantica</i> (~1%), <i>Juniperus</i> (~1%), and <i>Ulmus</i> (sporadic)<br><b>NAP:</b> Herbaceous taxa continue, mainly Poaceae (7-20%) and <i>Artemisia</i> (37-56%); Chenopodiaceae decrease (6-59%)<br><b>GA:</b> Low <b>DC:</b> No occurrence <b>CC:</b> Moderate to high                                                                                      | Steppe taxa become less widespread, giving way to open grassland                                                      |     |
| VI  |     | 113.70 - 117.19        | 242.48 - 250.16 | Not defined                                                         | <b>AP:</b> Very low abundances of AP ( <i>Betula</i> 0-1% and dec. <i>Quercus</i> 0-1%), very low tree concentration (c. 570-1320 grains cm <sup>-3</sup> )<br><b>NAP:</b> Predominance of steppe taxa, mainly Chenopodiaceae (52-66%) and <i>Artemisia</i> (18-33%)<br><b>GA:</b> Low <b>DC:</b> Low <b>CC:</b> Moderate                                                                                                                                                                                 | Extensive open desert-steppe vegetation                                                                               | 8   |
