# Supplementary material for: A new high-resolution pollen sequence at Lake Van, Turkey: Insights into penultimate interglacial-glacial climate change on vegetation history
Source: Copernicus journal article supplement (doi:10.5194/cp-2016-133), 2016-12-19
Supplement: Supplementary file [file cp-2016-133-AC1-supplement.zip]

# A new high-resolution pollen sequence at Lake Van, (Turkey): Insights into penultimate interglacial-glacial climate change on vegetation history

Pickarski, N.<sup>1</sup>, Litt, T.<sup>1</sup>

<sup>1</sup> University of Bonn, Steinmann Institute for Geology, Mineralogy, and Paleontology, Bonn, Germany

Correspondence to: Nadine Pickarski (pickarski@uni-bonn.de)

## Abstract

A new detailed pollen and oxygen isotope record of the penultimate interglacial-glacial cycle, corresponding to the Marine Isotope Stage (MIS) 7-6 (~~e. 242.5-131.2 ka before present~~), has been generated from the 'Ahlat Ridge' (AR) sediment core at Lake Van, Turkey. The presented Lake Van pollen record (c. 250.2-128.8 ka) displays the highest temporal resolution ~~for this interval in this region~~ with a mean sampling interval of ~540 years.

Integration of all available proxies shows three temperate intervals of high effective soil moisture availability, evidenced by the predominance of steppe-forested landscapes (oak ~~pine~~ steppe-forest) similar to the present interglacial vegetation in this sensitive semi-arid region between the Black Sea, Caspian Sea, and Mediterranean Sea. ~~which can be correlated with MIS 7e, 7c, and 7a.~~

The wettest/warmest stage as indicated by in terms of highest temperate tree percentages ~~is can be broadly correlated with~~ MIS 7c, while the amplitude of tree population maximum during the oldest penultimate interglacial (MIS 7e) appears to be ~~reduced due to warm but by a shift to colder~~ drier climatic conditions. The detailed comparison between the penultimate interglacial complex (MIS 7) to the last interglacial (Eemian, MIS 5e) and the current interglacial (Holocene, MIS 1) provides a vivid illustration of possible differences of successive climatic cycles. Intervening periods of treeless vegetation can be correlated of open steppe landscape correlate with MIS 7d and 7a, where open landscape favour-favouring local erosion and detrital sedimentation. The predominance of steppe elements (e.g., *Artemisia*, *Chenopodiaceae*) during MIS 7d indicates very dry/cold/dry climatic conditions. In contrast, the occurrence of more-higher temperate tree percentages (mainly deciduous *Quercus*) throughout MIS 7b points to relatively humid and mild conditions, which is in agreement with other pollen sequences in southern Europe, atmospheric CO<sub>2</sub> concentration and oxygen isotope records.

Despite the general dominance of dry/cold desert-steppe vegetation during the penultimate glacial (broadly equivalent to the MIS 6), this period can be divided into two parts: an early stage (c. 193-157 ka BP) with higher-pronounced oscillations in tree percentages, and a later stage (c. 157-131 ka BP) with lower tree percentages and subdued oscillations. This subdivision of the penultimate glacial is also seen in other pollen records from southern Europe (e.g., MD01-2444 and I-284; Margari et al., 2010; Roucoux et al., 2011). The occurring vegetation pattern is analogous to the MIS 3 to MIS 2 division during the last

**Formatiert:** Schriftart: (Standard) + Überschriften (Times New Roman)

**Formatiert:** Schriftart: (Standard) + Überschriften (Times New Roman), Kursiv

**Formatiert:** Schriftart: (Standard) + Überschriften (Times New Roman)

**Formatiert:** Schriftart: (Standard) + Überschriften (Times New Roman), Kursiv

**Formatiert:** Schriftart: (Standard) + Überschriften (Times New Roman)

**Formatiert:** Schriftart: (Standard) + Überschriften (Times New Roman)

**Formatiert:** Schriftart: (Standard) + Überschriften (Times New Roman)

34 glacial in the same sediment sequence. Furthermore, we are able to identify the MIS 6e event (c. 179-159  
35 ka BP) as described in marine pollen records, which reveals clear climate variability due to rapid  
36 alternation in the vegetation cover. indicates cooler but relatively wetter climate conditions during the  
37 penultimate glacial.

38 In comparison with long European pollen records archives, speleothem isotope records from the Near East,  
39 and global climate parameters (e.g., insolation, atmospheric CO<sub>2</sub> content), the new high-resolution Lake  
40 Van record presents an improved insight into regional vegetation dynamics and climate variability in the  
41 eastern Mediterranean region.

## 42 1. Introduction

43 The long continental pollen record of Lake Van (Turkey) contributes significantly to the picture of long-  
44 term interglacial-glacial terrestrial vegetation history and climate conditions in the Near East (Litt et al.,  
45 2014). Based on millennial-scale time resolution (between c. 1-4 ka), a lower time resolution, the 600,000  
46 year old pollen record already shows a general pattern of alternating periods of forested and open treeless  
47 landscapes that clearly responds to the Milankovitch-driven global climatic changes (Berger, 1978;  
48 Martinson et al., 1987). In that study, the Lake Van pollen record has demonstrated the potential  
49 ecological sensitivity for paleoclimate investigations that bridge the southern European and Near East  
50 climate realms. Since then, high-resolution multi-proxy investigations of the Lake Van sedimentary record  
51 have allowed the systematic documentation of different climatic phases throughout the last interglacial-  
52 glacial cycle (Pickarski et al., 2015a, 2015b).

53 To date, little attention has been focused on characterizing terrestrial sedimentary archives beyond 130 ka  
54 BP. In particular, the detailed vegetation response to climatic and environmental changes in the Near East  
55 during the penultimate interglacial-glacial cycle (Marine Isotope Stage (MIS) 7 to 6) hasis not beenbeing  
56 thoroughly investigated.

57 In this context, we present new high-resolution pollen and oxygen isotope data from the 'Ahlat Ridge'  
58 composite sequence over the penultimate interglacial-glacial cycle (between c. 242.5-131.2 ka-BP). We  
59 have added our recent results to the already available-existing low-resolution palynological and isotope  
60 data from Lake Van published by Litt et al. (2014) and Kwiecien et al. (2014). This enables us to provide  
61 new detailed documentation of multiple vegetation and environmental changes in the Near East-eastern  
62 Anatolia by a centennial-to-millennial-scale temporal resolution of ~180 to 780 years. Our record is  
63 placed in its regional context by the comparison with several archives from the Mediterranean region, e.g.,  
64 Lake Ohrid (between Former Yugoslavian Republic of Macedonia and Albania; Sadori et al., 2016),  
65 Ioannina basin (NW Greece; Frogley et al., 1999; Roucoux et al., 2008, 2011; Roucoux et al., 2011, 2008;  
66 Tzedakis et al., 2003a), Tenaghi Philippon (NE Greece; Tzedakis et al., 2003b, 2006) Tzedakis et al., 2006,  
67 2003b), and Yammoûneh basin (Lebanon; Gasse et al., 2011, 2015), Gasse et al., 2015, 2011).

Formatiert: Schriftart: (Standard) +Überschriften (Times New Roman)

Formatiert: Schriftart: (Standard) +Überschriften (Times New Roman), Deutsch (Deutschland)

Formatiert: Schriftart: (Standard) +Überschriften (Times New Roman)

68 In ~~our this presented~~ study, we ~~want to~~ address the following questions:

- 69 (I) ~~What kind of regional vegetation occurred~~reds during the penultimate interglacial complex ~~(MIS~~  
70 ~~7)?~~ Is the regional vegetation pattern of the ~~MIS 7~~oldest penultimate interglacial comparable  
71 to the last interglacial (Eemian, ~~MIS 5e~~) and current warm stage (Holocene, ~~MIS 1~~)?
- 72 (II) What processes characterized~~d~~ the climatic and environmental responses during ~~the~~  
73 ~~penultimate glacial~~MIS 6? Is this vegetation history similar to the millennial-scale variability  
74 recorded during the last glacial (~~MIS 4-2~~) in the same sequence?
- 75 (III) Does the Lake Van vegetation history correlate with other existing long pollen records from  
76 southern Europe? What are the influencing factors of environmental change in the Near East?

## 77 Site description

78 Lake Van is situated on the eastern Anatolia high plateau at 1,648 m asl (meters~~s~~ above sea level; Fig. 1) in  
79 Turkey. The deep terminal alkaline lake (~3,574 km<sup>2</sup>, max. depth >450 m) occupies the eastern  
80 continuation of the Muş basin developed in the collision zone between the Arabian and Eurasian plates at  
81 ~13 Ma (Reilinger et al., 2006). ~~Regional volcanism of Nemrut and Süphan volcanoes (at 2,948 m asl and~~  
82 ~~4,058 m asl, respectively; Fig. 1b), subaquatic hydrothermal exhalations and tectonic activities are still~~  
83 active today, evident by the M 7.2 Van earthquake occurred on October 23, 2011 (Altiner et al., 2013).

84 The present-day climate at Lake Van is continental (~~warm-dry~~-summer-~~dry~~ and ~~cool-wet~~-winter-~~wet~~), with  
85 a mean annual temperature of >9°C and mean annual precipitation between 400 and 1200 mm yr<sup>-1</sup>  
86 (Turkish State Meteorological Service, 1975-2008; 1000 mm yr<sup>-1</sup> (Climate data.org, 1982-2012; Table 1).

87 In general, eastern Anatolia receives most of its moisture in winter due to Cyprus low-pressure system  
88 within from the eastern Mediterranean Sea. ~~“Cyprus cyclones” generated in the Mediterranean Sea or~~  
89 ~~penetrating from the North Atlantic are steered by the mid-latitudes westerlies and reinforced eastward~~  
90 ~~along the northern Mediterranean coast~~ (Giorgi and Lionello, 2008). At Lake Van, rainfall decreases  
91 sharply from south-west (c. 1232 mm a<sup>-1</sup> in Bitlis) (~~c. 816 mm a<sup>-1</sup> in Tatvan~~) to north-east (c. 421 mm a<sup>-1</sup>  
92 in Ercis; c. 385 mm a<sup>-1</sup> in Van; Table 1) due to orographic effects of NW-SEE running Bitlis Massif  
93 parallel to the southern shore of the lake (Fig. 1).

94 Due to the diverse topography at Lake Van, local variations in moisture availability and temperature are  
95 quite pronounced, reflected in the modern vegetation distribution. At present, the vegetation cover ~~at~~  
96 around Lake Van has been altered by agricultural and pastoral activities. According to Zohary (1973),  
97 ~~However,~~ the southern mountain slopes are covered by the Kurdo-Zagrosian oak steppe-forest belt,  
98 ~~characterized by an open deciduous oak shrubs and parklike steppe forest~~ containing *Quercus brantii*, *Q.*  
99 *ithaburensis*, *Q. libani*, *Q. robur*, *Q. petraea*, *Juniperus excelsa*, and *Pistacia atlantica*, ~~which is also~~  
100 ~~known as the Kurdo-Zagrosian vegetation.~~ This oak steppe-forest has also been described as ‘mixed

Formatiert: Schriftart: (Standard) +Überschriften (Times New Roman)

Formatiert: Abstand zwischen Absätzen gleicher Formatierung einfügen

Formatiert: Schriftart: (Standard) +Überschriften (Times New Roman)

Formatiert: Schriftart: (Standard) +Überschriften (Times New Roman)

101 formation of cold-deciduous broad-leaved montane woodland and xeromorphic dwarf-shrublands' by Frey  
 102 and Kürschner (1989). In contrast, dwarf-shrub steppes of the Irano-Turanian floral province is dominated  
 103 by *Artemisia franseria* steppe, different species of Chenopodiaceae, and grasses with some  
 104 sub-Euxinian oak-forest remnants (Frey and Kürschner, 1989; van Zeist and Bottema, 1991; Zohary,  
 105 1973). the northern catchment area at Lake Van is dominated by a dwarf shrub steppes of *Artemisia*  
 106 *franseria* *anatolica*, also referred to as the Irano-Turanian steppe and desert vegetation (Zohary, 1973).

## 107 2. Material and methods

### 108 2.1 Ahlat Ridge composite record

109 The sediment archive 'AR' (Ahlat Ridge; 38.667°N, 42.669°E at c. 357 m water depth; Fig. 1) was  
 110 collected during the drilling-ICDP drilling campaign (International Continental Scientific Drilling  
 111 Program, [www.icdp-online.org](http://www.icdp-online.org)) 'PALEOVAN' in summer 2010 (Litt and Anselmetti, 2014; Litt et al.,  
 112 2012). The c. 219 mcbf (meter composite below lake floor) record contains a well-preserved partly  
 113 laminated or banded sediment sequence, intercalated by several volcanic and event layers (e.g., turbidites;  
 114 Stockhecke et al., 2014b). For further detailed description of the Lake Van lithology, we refer to  
 115 Stockhecke et al. (2014b).

116 In this paper, we focus on a 54.760.1 m long sediment section from 112.74117.19 to 58.0957.10 mcbf  
 117 representing the time span from c. 241.39250.16–131.24128.79 ka BP. In this section, we combine new  
 118 pollen and isotope data with the already existing those already obtained from the low-resolution pollen  
 119 record published by Litt et al. (2014) (Litt et al., 2014) and oxygen isotopes data derived from bulk  
 120 sediments ( $\delta^{18}\text{O}_{\text{bulk}}$ ) analyzed by Kwiecien et al. (2014) (Kwiecien et al., 2014).

### 121 2.2 Chronology

122 The analytical approaches applied for the Lake Van chronology have previously been published in detail  
 123 in Stockhecke et al. (2014a). All ages are given in thousands of years before present (ka BP), where 0 BP  
 124 is defined as 1950 AD. Marine Isotope Stage (MIS) boundaries follow Lisiecki and Raymo (2004). Main  
 125 results of the construction of the age-depth model are briefly summarized here.

126 For the investigated period, the age-depth model is based on independent proxy records, e.g., calcium and  
 127 potassium element ratio (Ca/K) measured by high-resolution X-ray fluorescence (XRF; details in  
 128 Kwiecien et al., 2014) measurements (Kwiecien et al., 2014), total organic carbon (TOC; details in  
 129 Stockhecke et al., 2014b), and pollen data (Litt et al., 2014). For the climatostratigraphic alignment of the  
 130 presented Lake Van sequence, the proxy records were visually synchronized to the speleothem-based  
 131 synthetic Greenland record (GL<sub>T-syn</sub> from 116 to 400 ka BP; Barker et al., 2011). The identifications of  
 132 TOC-rich sediments containing high Ca/K intensities and increased AP (arboreal pollen) values at the

Formatiert: Schriftart: (Standard) + Überschriften (Times New Roman)

Formatiert

onset of interstadials/interglacials were aligned to the interstadials/interglacial onsets of the synthetic Greenland record by using 'age control points'. Here, the correlation points of the Lake Van sedimentary record have been mainly defined by abiotic proxies (i.e., TOC) caused by a higher time resolution of this data set in comparison to the pollen samples available during that time. Even if we present a high-resolution pollen record in this paper, leads and lags between different biotic and abiotic proxies related to climate events have to be taken into account.

~~The chronology. Furthermore, the age-depth model of the presented section (117.2-57.1 mcbf; 250.2-128.8 ka) was improved by adding two paleomagnetic time markers (relative paleointensity minima, RPI), analyzed by Vigliotti et al. (2014), at ~213-210 ka BP (Pringle Fall event; Thouveny et al., 2004) and at ~240-238 ka BP (Mamaku event; Thouveny et al., 2004). In addition, three reliable  $^{40}\text{Ar}/^{39}\text{Ar}$  ages of single crystal dated tephra layer at c.  $161.9 \pm 3.3$  ka BP (V-114 at 71.48 mcbf), c.  $178.0 \pm 4.4$  ka BP (V-137 at 82.29 mcbf), and c. 182 ka BP (V-144 at 87.62 mcbf; Stockhecke et al., 2014b) are used to refine the age-depth model. For the final chronology of this presented period, the composite record was correlated by using eight 'age control points' derived from visual synchronization with the speleothem-based synthetic Greenland record (GL<sub>T-syn</sub> from 116 to 400 ka BP; Barker et al., 2011).~~

### 2.3 Palynological analysis

For the new high-resolution pollen analysis, 193 sub-samples were taken at 20 cm intervals. The temporal resolution between each pollen sample, derived from the present age-depth model, ranges from ~180 to 780 years (mean temporal resolution c. 540 years).

Sub-samples with a volume of 4 cm<sup>3</sup> were prepared using the standard palynological procedures by Faegri and Iversen (1989), improved at the University of Bonn. This preparation includes treatment with 10% hot hydrochloric acid (HCl; 10 min), 10% hot potassium hydroxide (KOH; 25 min), 39% hydrofluoric acid (HF; 2 days), glacial acetic acid (C<sub>2</sub>H<sub>4</sub>O<sub>2</sub>), hot acetolysis with 1 part concentrated sulfuric acid (H<sub>2</sub>SO<sub>4</sub>) and 9 parts concentrated acetic anhydride (C<sub>4</sub>H<sub>6</sub>O<sub>3</sub>; max. 3 min), KOH (10 %, hot), HCl (10 %, cold), HF (39 %, cold), acetolysis mixture (hot), and ultrasonic sieving to concentrate the palynomorphs. In order to calculate the pollen and micro-charcoal (>20 µm) concentrations (grains cm<sup>-3</sup> and particles cm<sup>-3</sup>, respectively), tablets of *Lycopodium clavatum* spore (Batch no. 483-216, Batch no. 177745) were added to each sample (Stockmarr, 1971). In all spectra, the average of ~540 pollen grains was counted in each sample using a Zeiss Axio Lab.A1 light microscope. Terrestrial pollen taxa were identified to the lowest possible taxonomic group, using the recent pollen reference collections of the Steinmann-Institute, Department of Paleobotany and as well as Beug (2004), Moore et al. (1991), Punt (1976), and Reille (1999, 1998, 1995). Furthermore, we followed the taxonomic nomenclature according to Berglund and Ralska-Jasiewiczowa (1986).

Formatiert: Abstand zwischen Absätzen gleicher Formatierung einfügen

Formatiert: Schriftart: (Standard) + Überschriften (Times New Roman)

Formatiert

166 Pollen results are given as a percentages and concentration diagram of selected taxa (Fig. 2). ~~This-The~~  
167 diagram includes the total arboreal pollen (AP; trees & shrubs) and non-arboreal pollen (NAP; herbs) ratio  
168 (100-% terrestrial pollen sum). In order to evaluate sea-lake surface conditions, dinoflagellate cysts and  
169 green algae (e.g., *Pseudopediastrum boryanum*, *P. kawraiskyi*, *Pediastrum simplex*, *Monactinus simplex*)  
170 were counted on the residues from preparation for palynological analyses. Percent calculation, cluster  
171 analysis (CONISS, sum of square roots) to define pollen assemblage zones (PAZ), and construction of the  
172 pollen diagram ~~was-were~~ carried out by using TILIA software (version 1.7.16; ©1991–2011 Eric C.  
173 Grimm).

174 The complete palynological dataset is available on the PANGAEA database ([www.pangaea.de](http://www.pangaea.de);  
175 <https://doi.org/10.1594/PANGAEA.871228>).

## 176 2.4 Oxygen isotope analysis

177 Stable oxygen isotope measurements ( $\delta^{18}\text{O}_{\text{bulk}}$ ) were made on bulk sediments samples with an authigenic  
178 carbonate content of ~30-% ( $\text{CaCO}_3$ ). Similar to the pollen analysis, 193 sub-samples were taken for the  
179 new high-resolution isotope record at 20 cm interval within the penultimate interglacial-glacial cycle.  
180 Before measurements were made, the samples were dried at c. 40°C for a least 48 hours~~2-days~~ and  
181 homogenized by a mortar. The isotope analyses were carried out at the Leibnitz-Laboratory, University of  
182 Kiel, using a Finnigan GasBenchII with carbonate option coupled to a DELTAplusXL IRMS.

183 All isotope values are reported in per mil (‰), relative to the Vienna Pee Dee Belemnite (VPDB).  
184 The standard deviation of the analyses of replicate samples is 0.02-‰ for  $\delta^{18}\text{O}_{\text{bulk}}$ .

## 185 3. New data from the Lake Van sequence

### 186 3.1. The high-resolution pollen record

187 The new palynological results from the penultimate interglacial-glacial cycle are ~~presented~~illustrated in a  
188 simplified pollen diagram-in (Fig. 2). ~~In addition, the m~~Main characteristics of each pollen zone ~~and sub-~~  
189 ~~zone~~ and the interpretation of their inferred dominant vegetation types are summarized in Table 2.

190 The low-resolution pollen sequence, shown in Litt et al. (2014), has already been divided into six pollen  
191 assemblage superzones (PAS IIIc, IV, Va, Vb, Vc, VI). This study followed the criteria for the  
192 classification of the pollen superzones as described in Tzedakis (1994) and references therein). Based on  
193 the new detailed high-resolution pollen sequence compared to the record in Litt et al. (2014), the PAS IV,  
194 Va and Vc can now be further subdivided into 13 pollen assemblage zones (PAZ).

195 The pollen diagram provides a broad view of alternation between regional open deciduous oak steppe-  
196 forest~~forested~~ and treeless desert-steppe vegetation~~open steppe landscapes~~. We were able to recognized  
197 three main ~~The three main forested~~ phases (PAZ Va1, Va3, and during Vc2, and Vc3), where total

**Formatiert:** Schriftart: (Standard) +Überschriften (Times New Roman), Unterstrichen

**Formatiert:** Schriftart: (Standard) +Überschriften (Times New Roman), Unterstrichen

**Formatiert:** Schriftart: (Standard) +Überschriften (Times New Roman)

**Formatiert:** Abstand zwischen Absätzen gleicher Formatierung einfügen

**Formatiert:** Schriftart: (Standard) +Überschriften (Times New Roman), Schriftfarbe: Rot

**Formatiert:** Schriftart: (Standard) +Überschriften (Times New Roman)

**Formatiert:** Abstand zwischen Absätzen gleicher Formatierung einfügen

**Formatiert:** Schriftart: (Standard) +Überschriften (Times New Roman)



198 arboreal ~~pollen vegetation reaches~~ percentages ~~reach~~ above 30-%, ~~are~~ These phases are predominantly  
 199 represented by deciduous *Quercus* (max. ~56-%), *Pinus* (max. ~26-%), *Betula* (max. ~8-%), and *Juniperus*  
 200 (max. ~7-%). ~~However, AP maxima do not exceed 60-70%, suggesting that 'closed' forest conditions~~  
 201 ~~were never established in eastern Anatolia.~~ Mediterranean sclerophylls, e.g., *Pistacia* cf. *atlantica*, are  
 202 only present sporadically and at very low percentages. During open non-forested periods, the most  
 203 significant herbaceous taxa are the steppe elements Chenopodiaceae (max. ~76-%), *Artemisia* (max. ~56  
 204 %), and further herbs, such as Poaceae (max. ~54-%), Tubuliflorae (max. ~13-%), and Liguliflorae (max.  
 205 ~10-%).  
 206 Throughout the sequence, the total pollen concentration values vary between c. 1,700 and 52,000 grains  
 207 cm<sup>-3</sup>. ~~During PAZ IV1-6, Va2, Vb, and VI, the pollen concentration is dominated mainly by steppic~~  
 208 ~~herbaceous pollen species (between 5000 and 52,000 grains cm<sup>-3</sup>), whereas PAZ IIIc 6, Va1, Va3, and~~  
 209 ~~Vc2-3 consist of tree and shrubs taxa (all above c. 5,000 grains cm<sup>-3</sup>), dominated mainly by steppic~~  
 210 ~~herbaceous pollen types. The highest tree concentration peaks occur during forested intervals in PAZ Va1,~~  
 211 ~~Va3, Vc2, and Vc3 (all above c. 5,000 grains cm<sup>-3</sup>).~~  
 212 In total, six ~~*Pediastrum*-green algae~~ taxa were identified ~~on in the~~ Lake Van sediments. Fig. 2a presents  
 213 only the most important *Pseudopediastrum* species. The density of the thermophilic taxa  
 214 *Pseudopediastrum boryanum* ~~reaches-reached~~ maxima values (c. 5,500 coenobia cm<sup>-3</sup>) ~~combined with~~  
 215 ~~high AP percentages especially during PAZ Vc2, whereas the~~ In contrast, the cold-tolerant species  
 216 *Pseudopediastrum kawraiskyi* ~~occurred~~ during ~~the treeless phases~~ (PAZ IV4-2; ~~max. values c. 2,000~~  
 217 coenobia cm<sup>-3</sup>).  
 218 Furthermore, we calculated dinoflagellate concentration (~~probably *Spiniferites* species *pentorii*~~; cysts cm<sup>-3</sup>  
 219 <sup>3</sup>) in order to get additional information about environmental conditions of the lake water (Dale, 2001;  
 220 Shumilovskikh et al., 2012; ~~Fig. 2a~~). ~~The occurrence of *Spiniferites* spp. in lacustrine sediments suggests~~  
 221 ~~low aquatic bio-productivity (low nutrient level) and hypersaline conditions (Zonneveld and Pospelova,~~  
 222 ~~2015; Zonneveld et al., 2013).~~ In this study, the concentration of dinoflagellate ~~cysts~~ is high (500-2,000  
 223 cysts cm<sup>-3</sup>) during non-forested periods, especially within PAZ IV1, IV3, IV5, Va2, and PAS Vb (~~Fig. 2a~~).  
 224 The microscopic charcoal concentrations range between 300 and ~3,000 particles cm<sup>-3</sup> during non-forested  
 225 phases when terrestrial biomass ~~were was~~ relatively low (PAZ IV1-5, Va2, Vb and Vc1; Fig. 2a). During  
 226 forested phases, the charcoal content reaches maxima values of c. 8,000 particles cm<sup>-3</sup> (e.g., in PAZ Va3,  
 227 Vc4-2).

### 228 3.2. The oxygen isotopic composition of Lake Van sediments

229 The general pattern of Lake Van isotope composition of bulk sediments shows very high ~~frequency~~  
 230 ~~oscillation (Fig. 3)-amplitude~~. The  $\delta^{18}\text{O}_{\text{bulk}}$  ranges from c. 5.9-‰ to -4.6-‰. Positive values occur between  
 231 250 and 244 ka, 238-222 ka, at 215 ka; 213-203 ka, 192-190 ka, 189-182 ka, and mainly between 171-157

**Formatiert:** Schriftart: (Standard) +Überschriften (Times New Roman)

**Formatiert:** Schriftart: (Standard) +Überschriften (Times New Roman), Nicht Kursiv

**Formatiert:** Schriftart: (Standard) +Überschriften (Times New Roman)

**Formatiert:** Schriftart: (Standard) +Überschriften (Times New Roman)

**Formatiert:** Schriftart: (Standard) +Überschriften (Times New Roman), Kursiv

**Formatiert:** Schriftart: (Standard) +Überschriften (Times New Roman)

**Formatiert:** Schriftart: (Standard) +Überschriften (Times New Roman)

**Formatiert:** Schriftart: (Standard) +Überschriften (Times New Roman)

**Formatiert:** Schriftart: (Standard) +Überschriften (Times New Roman), Kursiv

**Formatiert:** Schriftart: (Standard) +Überschriften (Times New Roman)

ka and 141-134 ka-~~BP~~. Negative isotope composition ( $\delta^{18}\text{O}_{\text{bulk}}$  below 0‰) can be observed at ~241 ka; 221-216 ka; 202-194 ka; at ~181 ka, 178-171 ka, and between 156 and 155 ka-~~BP~~. Previous studies at Lake Van (e.g., Kwiecien et al., 2014; Lemcke and Sturm, 1997; Litt et al., 2012, 2009; Wick et al., 2003) have shown that the stable isotope signature of lake carbonates reflects complex interaction between both several regional climatic variables and local site-specific factors. Such climate variables are the moisture source, in this case the eastern Mediterranean Sea surface water and the storm trajectories coming from the Mediterranean Sea, as well as temperature changes. Furthermore, the lake water itself is related to the seasonality of precipitation (both rain and snowfall; water inflow) and evaporation processes in the catchment area. However, the Lake Van authigenic carbonate  $\delta^{18}\text{O}_{\text{bulk}}$  values are primarily controlled by water temperature and isotopic composition of the lake water ( $T+\delta^{18}\text{O}_{\text{w}}$ ; Kwiecien et al., 2014; Leng and Marshall, 2004; Roberts et al., 2008).

At the beginning of terrestrial temperate intervals (e.g., PAZ Vc4, the end of Vb, Va1, and IIIc6), the  $\delta^{18}\text{O}_{\text{bulk}}$  composition of the lake water becomes progressively more enriched-depleted during interglacial/interstadial periods and lighter during glacial/stadial stages (Fig. 3cb). According to Kwiecien et al. (2014) and Roberts et al. (2008), Sharp-negative isotope values at the beginning of temperate intervals peaks at Termination III (T-III at 241.4 ka BP) and at the transition from stadial to pronounced interstadial periods documents not only enhanced precipitation during winter months but also the significant contribution of depleted snow melt/glacier meltwater during the summer months. (Kwiecien et al., 2014; Roberts et al., 2008).

## 4. Discussion

### 4.1 Boundary definition and biostratigraphy

Based on long continental records in southern Europe (compiled by Tzedakis et al., 1997, 2001) and in the eastern Mediterranean area (Litt et al., 2014; Stockhecke et al., 2014a), it was shown that there is a broad correspondence between warm climatic intervals, respectively periods of low ice volume as defined by Marine Isotope Stages (MIS; Lisiecki and Raymo, 2004) and terrestrial temperate intervals (forested periods). In the continental, semi-arid Lake Van area it is difficult to use only the expansion of trees as criterion for the lower boundary of a warm stage. Therefore, the climatic boundaries at Lake Van were mainly defined by abiotic proxies (i.e., TOC) caused by a higher time resolution (Stockhecke et al., 2014a). However, we are aware that using different proxies do not necessarily occur at the same time (Sánchez Goñi et al., 1999; Shackleton et al., 2003). Even if we present a high-resolution pollen record in this paper, leads and lags between different biotic and abiotic proxies related to climate events have to be taken into account.

Formatiert: Einzug: Links: 0 cm, Hängend: 0,75 cm

Formatiert: Schriftart: (Standard) +Überschriften (Times New Roman)



In addition, glacial/interglacial transitions (Termination) are near-synchronous global and abrupt climate changes. This scenario includes rising of Northern Hemisphere summer insolation, leading to ice-sheet melting and freshwater supply into the Atlantic Ocean (Denton et al., 2010). In this study, we follow the structure of Termination III at 250 ka, TIIIA at 223 ka, and TII at 136 ka after Barker et al. (2011) and Stockhecke et al. (2014a; Fig. 3, 5).

The climatostratigraphical term ‘interglacial’ and ‘interstadial’ were originally defined by Jessen and Milthers (1928) on the basis of paleobotanical criteria that are still generally accepted at present time. Here, an interglacial is understood as a temperate period with a climatic optimum at least as warm as the present-day interglacial (Holocene) climate in the same region. An interstadial is defined as a warm period that was either too short or too cold to reach the climate level of an interglacial in the same region. This definition is also valid for the Lake Van region as shown by Litt et al. (2014). In comparison, stadial stages correspond to cold/dry intervals marked by global and local ice re-advances (Lowe and Walker, 1984).

#### 4.4.2 The penultimate interglacial complex (MIS 7)

According to Litt et al. (2014), the three-marked temperate arboreal pollen peaks (PAS Vc, Va3, and Va1) can be described as an interglacial complex. This general pattern of triplicate warm phases interrupted by two terrestrial cold periods (PAS Vb, PAZ Va2) is characteristic both in marine and ice-core records (MIS 7e, 7c, and 7a after Lisiecki and Raymo, 2004), as well as for continental pollen sequences in southern Europe correlated and synchronized by Tzedakis et al. (2001). The penultimate interglacial at Lake Van resembles other interglacial complexes (e.g., the last interglacial/interstadial complex, MIS 5; Piekarski et al., 2015a, 2015b) with three remarkable arboreal pollen peaks. Here, the first sub stage MIS 7e is generally considered as the full interglacial. This general pattern of three warm phases (MIS 7e, 7c, and 7a) is separated by two intervening cold intervals (stadials; MIS 7d and 7b) comparable with the marine classification by Martinson et al. (1987).

##### Forested periods

The Lake Van pollen sequence shows Within the penultimate interglacial complex, the three pronounced steppe-forested intervals PAS Vc (113.7-109.1 mcbf, 242.5-227.4 ka), PAZ Va3 (104.2-101.3 mcbf, 216.3-207.6 ka) and PAZ Va1 (99.9-97.0 mcbf, 203.1-193.4 ka) can be broadly correlated with the MIS 7e, 7c, and MIS 7a after Lisiecki and Raymo (2004), indicating within MIS 7 that display high moisture availability and/or warmer temperature (Fig. 2a, 3f). Here, the steppe forest periods of MIS 7e (242.5-227.4 ka BP), MIS 7c (216.3-207.6 ka BP), and MIS 7a (203.1-193.4 ka BP) The oldest terrestrial warm phase (242.5-227.4 ka, PAS Vc, MIS 7e) followed the classical vegetation pattern of early to late temperate stage. The vegetation succession starts with the colonization of open

**Formatiert:** Schriftart: (Standard) +Überschriften (Times New Roman)

##### Feldfunktion geändert

**Formatiert:** Schriftart: (Standard) +Überschriften (Times New Roman), Deutsch (Deutschland)

**Formatiert:** Schriftart: (Standard) +Überschriften (Times New Roman), Deutsch (Deutschland)

**Formatiert:** Schriftart: (Standard) +Überschriften (Times New Roman)

**Formatiert:** Schriftart: (Standard) +Überschriften (Times New Roman), Deutsch (Deutschland)

**Formatiert:** Schriftart: (Standard) +Überschriften (Times New Roman)

**Formatiert:** Schriftart: (Standard) +Überschriften (Times New Roman), Deutsch (Deutschland)

**Formatiert:** Schriftart: (Standard) +Überschriften (Times New Roman)

**Formatiert:** Schriftart: (Standard) +Überschriften (Times New Roman), Deutsch (Deutschland)

**Formatiert:** Schriftart: (Standard) +Überschriften (Times New Roman)

**Formatiert:** Schriftart: (Standard) +Überschriften (Times New Roman), Deutsch (Deutschland)

**Formatiert:** Schriftart: (Standard) +Überschriften (Times New Roman)

habitats by pioneer trees, such as *Betula*, followed by deciduous *Quercus* and followed by sclerophyllous *Pistacia cf. atlantica* and a gradual expansion of deciduous *Quercus*. The abrupt occurrence of the frost-sensitive *Pistacia*, as a characteristic feature at the beginning of interglacials in the eastern Mediterranean region at the beginning of each forested interval, indicates relatively mild winters, but also firmly points to the presence of summer aridity summer dryness due to higher temperature and evaporation regime, and mild winter temperature. (Litt et al., 2014, 2009; Pickarski et al., 2015a; Wick et al., 2003). Similar to the Holocene, the early interglacial spring/summer dryness might be responsible for the delay between the onset of climatic amelioration and of the establishment of deciduous oak steppe-forest as the potential natural interglacial vegetation in eastern Anatolia. Here, the length of the delay depending on local conditions keeping moisture availability below the tolerance threshold for tree growth in the more ecologically stressed areas. Indeed, a reduction of spring rainfall and extension of summer-dry conditions favoured the rapid development of a grass-dominated landscape (mainly *Artemisia*, Poaceae; Fig. 2b). Moreover/Furthermore, the fire activity rose at the beginning of each warm phase Lake Van when global temperature increased and the vegetation communities changed from warm-productive grasslands to more steppe-forested environments. Increased fire frequency is clearly visible by high charcoal concentration up to 53,000 particles cm<sup>-3</sup> (Fig. 3d). After Termination III at 243 ka, the vegetation change towards more steppe-forest environments correlates with. In addition, the most depleted (negative)  $\delta^{18}\text{O}_{\text{bulk}}$  values, which occur at the base beginning of each early temperate stage (c. 242-240 ka; Fig. 3c). This rapid change As discussed earlier, depleted isotope values reflects intensified freshwater supply into the lake by melting of Bitlis glaciers in summer months favouring high detrital input into the basin (low Ca/K ratio; Fig. 3d) and/or enhanced precipitation during winter months (Kwiecien et al., 2014; Roberts et al., 2008).

The climate optimum of the first warm phase each forested interval are is characterized by significant expansion of temperate the maximum development of oak steppe-forests, where summer-green taxa, mainly deciduous *Quercus* rises consistently (above 20% between c. 240-237 ka), *Pistacia cf. atlantica*, *Betula*, and sporadic occurrence of *Ulmus*. In case of MIS 7e, the climate optimum occurs between c. 240 and 237 ka BP. The vegetation composition documents a warm-temperate environment with enhanced precipitation during the growing season, which can be supported by depleted isotope values ( $\delta^{18}\text{O}_{\text{bulk}}$  - 2.17‰; Fig. 3c). Charcoal maxima (>3000 particles/cm<sup>3</sup>) correlates, coeval with the delayed expansion of steppe-forest, with more fuel for burning. Independent of environmental conditions around the lake, the presence of thermophilic algae (i.e., *Pseudopediastrium boryanum*), which occurred mainly during MIS 7e, displays warm and eutrophic conditions within the lake. In addition, the oxygen isotope composition of the lake water confirms the obvious climate change within the region. The gradual shift from depleted to enriched  $\delta^{18}\text{O}_{\text{bulk}}$  isotope values ( $\delta^{18}\text{O}_{\text{bulk}}$  5.15‰) indicates a change towards warm-climate conditions with high evaporation rates and/or decreased moisture availability (Kwiecien et al., 2014; Roberts et al., 2008).

**Formatiert:** Schriftart: (Standard) +Überschriften (Times New Roman)

Here, positive  $\delta^{18}\text{O}_{\text{bulk}}$  values at Lake Van are attributed to evaporative  $^{18}\text{O}$ -enrichment of the lake water during the dry season. Furthermore, Kwiecien et al. (2014) described the relation between soil erosion processes and ~~the~~ vegetation cover in the catchment area. They defined interglacial conditions related to increased precipitation indicated by higher amount of arboreal pollen and lower detrital input. Our new high-resolution pollen record validates ~~this~~their hypothesis with high authigenic carbonate concentration (high Ca/K ratio, low terrestrial input) along with the increased terrestrial vegetation ~~cover~~ density (high AP percentages above 50%) during the climate optimum (Fig. 3e).

**Formatiert:** Schriftart: (Standard) +Überschriften (Times New Roman)

**Formatiert:** Schriftart: (Standard) +Überschriften (Times New Roman)

The ensuing ecological succession at Lake Van of the first warm stage is documented by a shift from deciduous oak steppe-forest towards the predominance high percentages of dry-tolerant and/or cold-adapted coniferous-conifer taxa species (e.g., *Pinus* and *Juniperus*; c. 237-231 ka). Especially, high percentages of *Pinus* that suggests a cooling/drying trend, which occurred during low seasonal contrasts (low summer insolation and high winter insolation; Fig. 3) with summer dry environment during the late stage (Fig. 2a, 3e). *Pinus* (probably *Pinus nigra*) as a main arboreal component of the 'Xero-Euxinian steppe-forest' recently occurs in more continental western and central Anatolia, and in the rain shadow of the coastal Pontic mountain range (van Zeist and Bottema, 1991; Zohary, 1973). However, we are aware of the fact. Compared to the present distribution of *Pinus nigra* in Anatolia, the Lake Van region was probably more affected by an extended distribution area of pine during the penultimate interglacial as indicated by higher pollen percentages (Holocene below 5%; PAZ Vc2 up to 26%; PAZ Va3 up to 20%; Fig. 4). Holocene that pine pollen was mainly transported over several kilometers via wind into the Lake Van basin. Independent of environmental conditions around the lake, the presence of thermophilic algae (i.e., *Pseudopediatrum boryanum*) displays warm and eutrophic conditions within the lake during the late temperate phase.

**Formatiert:** Schriftart: (Standard) +Überschriften (Times New Roman)

Nevertheless, the The presented regional vegetation composition can be described as an oak steppe-forest and marks one of the longest phases of the penultimate interglacial complex, lasting 15,000 years, with a climate optimum between 240 and 237 ka (Fig. 4c). However, this optimum does not appear of very high intensity as suggested by lower development of temperate plants compared to the following warm phase. The second terrestrial temperate interval (PAS Vb-PAZ Va3; 106.5 -101.3 mcalbf; c. 221-207 ka; MIS 7c) starts with a shift from cold/arid desert steppe vegetation (e.g., *Chenopodiaceae*) to less arid grassland vegetation (e.g., *Poaceae*, *Artemisia*; Fig. 2b). This was followed by an expansion of *Betula*, high abundance of deciduous *Quercus*, and continued with increased *Pinus* percentages. In this period, the occurrence of *Pistacia cf. atlantica* was not as pronounced as during the PAS Vc (MIS 7e), which can be explained by a lower winter insolation (cooler winters; Fig. 3b). Despite all this, the oxygen isotope signature displays similar depleted values ( $\delta^{18}\text{O}_{\text{bulk}}$  up to -3.8‰; Fig. 3c) at the beginning of the middle warm phase, right after the Termination IIIA at 222 ka (Barker et al., 2011; Stockhecke et al., 2014a). In general, the second warm stage shows the highest amplitude of deciduous *Quercus* (peaked at 212.6 ka

**Formatiert:** Schriftart: (Standard) +Überschriften (Times New Roman)

BP; Fig. 3f) of the entire sequence, which corresponds to the occurrence of the most floristically diverse and complete forest succession in southern European pollen diagrams at the same time (Follieri et al., 1988; Roucoux et al., 2008; Tzedakis et al., 2003b). In fact, deciduous *Quercus* percentages (c. 56%) reach the level of the last interglacial (MIS 5e) and the Holocene forested intervals, representing the most humid and temperate period during the penultimate interglacial complex at Lake Van (Fig. 4; Litt et al., 2014; Pickarski et al., 2015a). Preliminary comparison with pollen records of Tenaghi Philippon (Tzedakis et al., 2003b) and Ioannina basin (Roucoux et al., 2008) suggest that the extent and the diversity of vegetation development is clearly controlled by insolation forcing and associated climate regimes (high summer temperature, high winter precipitation). At Lake Van, the interglacial forest expansion is closely associated with the timing of the Mid-June insolation peak (Tzedakis, 2005). In general, Mediterranean sclerophylls and other summer-drought resistant taxa expanding during the period of max. summer insolation, while thermophilous taxa are better suited to the less-seasonal climates of the later part of interglacial. Indeed, the highest expansion of deciduous *Quercus* occurs, coeval to *Pinus*, during lowest seasonal contrasts (cooler summer and warmer winters). The different amplitudes in the deciduous tree development might have resulted from higher Mid-June insolation at the beginning of PAZ Va3 (MIS 7c) relative to PAZ Vc4 (MIS 7e, similar to Holocene levels), despite lower atmospheric CO<sub>2</sub> content (c. 250 ppm, Fig. 5; Jouzel et al., 2007; Lang and Wolff, 2011; Petit et al., 1999; Tzedakis, 2005), and thus, mirrored significant variability in regional effective moisture content and/or temperature. After a short-term climatic deterioration between 207 and 203 ka BP, the spread of *Pistacia* cf. *atlantica*, *Betula*, and the predominance of deciduous *Quercus* characterize the youngest warm phase PAZ Va1 (99.9-97.0 mcal, 203.1-193.4 ka, MIS 7a) within the penultimate interglacial complex. Similar to the previous warm phases, the deciduous *Quercus* percentages (c. 38%) reach the level of the Holocene forested interval (deciduous *Quercus* c. 40%; Fig. 4). A possible explanation for high thermophilous oak percentages within MIS 7a is the persistence of relatively large tree populations through the cold period equivalent to MIS 7b, which was also established in pollen records from Lac du Bouchet (Reille et al., 2000) and at Ioannina basin (Roucoux et al., 2008). in the pollen spectra clearly illustrates a cooling/drying trend that appears during the time of minimum ice volume. In other words, before the substantial ice accumulation is evident in the marine MD01-2447 record (Desprat et al., 2006). In light of these insights, the MIS 7e vegetation succession shows a shift from temperate species to the predominance of conifer taxa. Similar features are recorded in the last interglacial stage (MIS 5e; 131.2-111.5 ka BP; Fig. 4), where the shift indicates higher continentality, in particular to high seasonal contrasts on land along with low moisture availability (Litt et al., 2014; Pickarski et al., 2015a).

**Formatiert:** Schriftart: (Standard) +Überschriften (Times New Roman)

Such pattern of forest succession, mentioned above, is not as clearly developed in each forested intervals. For example, MIS 7e does not show a clear *Pistacia cf. atlantica* phase or MIS 7a a distinct *Pinus* phase. Furthermore, the different amplitudes of the deciduous tree development, e.g., weak oak steppe forest re-expansion during MIS 7a and 7e, mirrored significant variability in regional effective moisture content and/or temperature. These differences stem from the variety of factors, e.g., changes in orbital parameters reflected in insolation forcing. In the case of MIS 7a, the ice volume was larger than during MIS 7e (Desprat et al., 2006). Nevertheless, a possible explanation for high deciduous *Quercus* percentages in MIS 7a is the persistence of relatively large tree populations through the preceding stadial MIS 7b.

All three forested stages of the MIS 7 penultimate interglacial complex are clearly recorded in other long terrestrial pollen sequences from Lebanon and southern Europe: (I) the Yammoûneh record (Gasse et al., 2015), (II) the Tenaghi Philippon sequence (Tzedakis et al., 2003b), (III) Ioannina basin (Roucoux et al., 2008), and (IV) the Lake Ohrid sequence (Sadori et al., 2016). Fig. 5 shows that the Lake Van pollen record generally agrees with the vegetation development of the Mediterranean region. However, we have to take into consideration that most southern European sequences, e.g., the Ioannina basin, are situated near to refugial areas, in which temperate trees persisted during cold stages (Bennett et al., 1991; Milner et al., 2013; Roucoux et al., 2008; Tzedakis et al., 2002). In this places, where moisture availability was not limiting, the woodland expansion occurred near the glacial/interglacial boundary (Tzedakis, 2007). For example, the Mediterranean sequences show the most floristically diverse and complete forest succession during the MIS 7e (Follieri et al., 1988; Roucoux et al., 2008; Sadori et al., 2016; Tzedakis et al., 2003b). In contrast, the Lake Van interstadial contains only the highest amplitude of deciduous *Quercus* (peaked at 212.6 ka BP) of the entire sequence. In fact, deciduous *Quercus* percentages reach the level of the last interglacial (MIS 5e) and the Holocene forested intervals, representing the most humid and temperate period at Lake Van (Fig. 4; Litt et al., 2014). Preliminary comparison with eastern Mediterranean pollen records suggest that the extent and the diversity of vegetation development is clearly controlled by insolation forcing and associated climate regimes (high summer temperature, high winter precipitation). Therefore, the difference in the deciduous *Quercus* percentages might have resulted from higher Mid June insolation during MIS 7e relative to MIS 7c (similar to Holocene levels), despite lower atmospheric CO<sub>2</sub> content (c. 250 ppm, Fig. 5; Jouzel et al., 2007; Lang and Wolff, 2011; Petit et al., 1999; Tzedakis, 2005).

Despite this, high-resolution pollen records from the eastern Mediterranean region (e.g., Ioannina basin; Roucoux et al., 2008) suggest that the MIS 7 winter temperature during all of these three warm intervals seem to be lower than during the Holocene and the last interglacial as indicated by smaller populations of sclerophyllous taxa. Reduced thermophilous components were also discussed for the Velay region (Reille et al., 2000), where the warm phases Bouchet 2 and 3 equivalent to MIS 7c and 7a are described as interstadials rather than interglacials. This observation of a cooler MIS in southern Europe contradicts to the vegetation development at Lake Van, where all warm intervals reach the level of the last interglacial

**Formatiert:** Schriftart: (Standard) +Überschriften (Times New Roman)

**Feldfunktion geändert**

**Formatiert:** Schriftart: (Standard) +Überschriften (Times New Roman)

**Formatiert:** Schriftart: (Standard) +Überschriften (Times New Roman)

**Feldfunktion geändert**

**Formatiert:** Schriftart: (Standard) +Überschriften (Times New Roman)

**Formatiert:** Schriftart: (Standard) +Überschriften (Times New Roman), Englisch (Vereinigte Staaten)

**Formatiert:** Schriftart: (Standard) +Überschriften (Times New Roman)

**Formatiert:** Schriftart: (Standard) +Überschriften (Times New Roman), Englisch (Vereinigte Staaten)

**Formatiert:** Schriftart: (Standard) +Überschriften (Times New Roman)

**Formatiert:** Schriftart: (Standard) +Überschriften (Times New Roman)

**Formatiert:** Schriftart: (Standard) +Überschriften (Times New Roman), Englisch (Vereinigte Staaten)

**Formatiert:** Schriftart: (Standard) +Überschriften (Times New Roman)

**Formatiert:** Schriftart: (Standard) +Überschriften (Times New Roman)

**Formatiert** ...



and the Holocene. At Lake Van, there seems no reason to define the MIS 7c and MIS 7a as an interstadial, separated from the MIS 7e interglacial. However, we cannot recognize a clear interglacial-like vegetation succession within the MIS 7e with, e.g., the occurrence of the summer drought resistant species *Pistacia cf. atlantica*. In this case, there does not seem any reason to define the MIS 7e as a full interglacial separate from MIS 7e.

### Non-forested periods

The two stadial phases between the three forested intervals, the first part of PAZ Vb (227-221 ka, 109.1-106.5 mcbf) and PAS Va2 (208-203 ka, 101.3-99.9 mcbf), are broadly equivalent to MIS 7d and MIS 7a (Lisiecki and Raymo, 2004), MIS 7d (227.4-216.3 ka BP) and MIS 7b (207.6-203.1 ka BP). At Lake Van, cold periods are generally characterized by: (I) extensive steppe vegetation when tree growth was inhibited either by dry/cold or low atmospheric CO<sub>2</sub> conditions (Litt et al., 2014; Pickarski et al., 2015b), (II) high dinoflagellate concentration (*Spiniferites bentorii*, probably a species which tolerates high water salinity conditions and suggest low aquatic bio-productivity; Fig. 2a), and (III) high regional mineral input derived from the basin slopes (low Ca/K ratio; Kwiecien et al., 2014; Fig. 3e3d).

Due to the strongest development of extensive semi-desert steppe plants (mainly Chenopodiaceae above 75%) and massive reduction of temperate tree (AP c. 5-%; Fig. 2), the MIS 7d first cold phase suggests considerable climate deterioration and increased aridity. Furthermore, this stadial period is marked by large ice volume and extremely low global temperatures, documented by low CO<sub>2</sub> concentration (e. 200~210 ppm; Fig. 5) values that are nearly as low as those of MIS 8 and 6 (McManus et al., 1999; Petit et al., 1999). Between 227 and 221 ka, the oxygen isotope record displays consistently  $\delta^{18}\text{O}_{\text{bulk}}$  values above 0‰ that reflect dry climate condition. Concerning the oxygen isotope record, the MIS 7d documents a significant change towards lighter  $\delta^{18}\text{O}_{\text{bulk}}$  values (up to -3.8‰; Fig. 3b) that reflect reduced evaporation in the Lake Van catchment area (Fig. 3c). Such a cold-dry and/or dry-cold period within the entire penultimate interglacial complex can also be recognized in all pollen sequences from Lebanon and southern Europe (Fig. 5; e.g., Gasse et al., 2015; Roucoux et al., 2008; Tzedakis et al., 2003b). An exception is the Lake Ohrid record, which shows only a minor temperate tree decline (Sadori et al., 2016).

In contrast to conventional cold/dry periods at Lake Van, the second cold phase MIS 7b stadial (PAS Va2) recognizes only a slight and short-term steppe-forest contraction. Although the landscape at Lake Van was more open during the youngest phase, moderate values of *Betula*, deciduous *Quercus* (up to 16-%) and conifers (*Pinus*, *Juniperus*) formed steppe vegetation with still patchy pioneer and temperate trees. The significantly larger temperate tree pollen AP percentages (AP c. 20-%) during the sub-stage 7b PAZ Va2 relative to MIS 7d the PAZ Vb point to milder climate conditions. In addition, the continuous heavier oxygen isotope signature ( $\delta^{18}\text{O}_{\text{bulk}}$  between 1.0-2.4‰) confirms the assumption of milder conditions with higher evaporation rates (Fig. 3b) and more humid conditions. Based on these results, the Lake Van

**Formatiert:** Schriftart: (Standard) + Überschriften (Times New Roman)



470 pollen ~~archive-record~~ mirrored the trends seen in various paleoclimatic archives (Fig. 5). Indeed, ~~a-number~~  
 471 ~~of arboreal-several~~ pollen sequences from the Mediterranean area and oxygen isotope records suggest that  
 472 the North Atlantic and southern European region (~~i.e., e.g.,~~ Ioannina basin; ~~Roucoux et al., 2008~~~~Roucoux~~  
 473 ~~et al., 2008~~; Fig. 5d) did not experience severe climatic cooling during MIS 7b (Fig. 5; e.g., Bar-  
 474 Matthews et al., 2003; Barker et al., 2011; McManus et al., 1999; Petit et al., 1999). In addition, the global  
 475 ice volume remains relatively low during the MIS 7b in comparison with other stadial intervals with  
 476 similarly low insolation values (e.g., Petit et al., 1999; Shackleton et al., 2000). Vostok ice-core sequence  
 477 also records a relatively ~~high~~<sup>2</sup> CO<sub>2</sub> content (c. 230-240 ppm) during MIS 7d supporting a slight decline of  
 478 temperature compared with MIS 7d (CO<sub>2</sub> content c. 207-215 ppm; Fig. 5; McManus et al., 1999; Petit et  
 479 al., 1999)(McManus et al., 1999; Petit et al., 1999).

#### 480 *Comparison of past interglacials at Lake Van*

481 The direct comparison of the penultimate interglacial complex (MIS 7e) with the last interglacial (Eemian,  
 482 MIS 5e; Pickarski et al., 2015a) and the current interglacial (Holocene, MIS 1; Litt et al., 2009) provides  
 483 the opportunity to assess how different successive climate cycles can be (Fig. 4).

484 In general, all interglacial climate optima ~~are-were~~ characterized by the development of an oak steppe-  
 485 forest, all of which reached the level of the last interglacial and the Holocene, especially the extent of  
 486 temperate tree taxa. indicates high effective moisture. A-Such dense vegetation cover reduced~~s~~ physical  
 487 erosion of the surrounding soils in the lake basin. Furthermore, the dominance of steppe-forested  
 488 landscapes and productive steppe environment ~~leads-led~~ to enhanced fire activity in the catchment area.

489 ~~However~~In addition to these aspects, all interglacial intervalsthe MIS 8/7e, MIS 7d/7c as well as the MIS  
 490 6/5e boundary at-in the continental, semi-arid Lake Van region recognized a delayed ~~forest~~  
 491 ~~onset~~expansion of deciduous oak steppe-forest of c. ~~3,000~~<sup>5000</sup> to 2,000 years, comparable to the pollen  
 492 investigations in the marine sediment cores west of Portugal by Sánchez Goñi et al. (2002, 1999). As  
 493 already shown in high-resolution pollen studies by Wick et al. (2003), Litt et al. (2009), and Pickarski et  
 494 al. (2015a), a delay in temperate oak steppe-forest refer to the Pleistocene/Holocene boundary as defined  
 495 in the Greenland ice core from NorthGRIP stratotype (for the Pleistocene/Holocene boundary: Walker et  
 496 al., 2009) as well as from the speleothem-based synthetic Greenland record (GL<sub>T-SYN</sub>; Barker et al., 2011;  
 497 Stockhecke et al., 2014) can be recognized. visible by the slow expansion of deciduous Quercus, based on  
 498 summer dry conditions (Litt et al., 2009; Pickarski et al., 2015a).The length of the delay depending on  
 499 slow migration of deciduous trees from arboreal refugia (probably the Caucasus region) and/or by changes  
 500 in seasonality of effective precipitation rates (Arranz-Otaegui et al., 2017; Pickarski et al., 2015a). In  
 501 particular oak species are strongly dependent on spring precipitation (El-Moslimany, 1986). A reduction  
 502 of spring rainfall and extension of summer-dry conditions favoured the rapid development of a grass-  
 503 dominated landscape (mainly *Artemisia*, Poaceae; considered as competitors for *Quercus* seedlings) and

**Formatiert:** Schriftart: (Standard) +Überschriften (Times New Roman)

**Feldfunktion geändert**

**Formatiert:** Schriftart: (Standard) +Überschriften (Times New Roman)

**Formatiert:** Schriftart: (Standard) +Überschriften (Times New Roman), Tiefgestellt

**Formatiert:** Schriftart: (Standard) +Überschriften (Times New Roman)

**Formatiert:** Schriftart: (Standard) +Überschriften (Times New Roman)

**Feldfunktion geändert**

**Formatiert:** Schriftart: (Standard) +Überschriften (Times New Roman)

**Formatiert:** Schriftart: (Standard) +Überschriften (Times New Roman)

**Formatiert:** Schriftart: (Standard) +Überschriften (Times New Roman)

**Formatiert** ...

504 *Pistacia* shrubs in the very sparsely wooded slopes (Asouti and Kabukcu, 2014; Djamali et al., 2010).  
 505 Furthermore, high intensity of wildfires of late-summer grasslands, at the beginning of each warm period  
 506 could be responsible for a delayed re-advance of steppe-forest in eastern Anatolia (Arranz-Otaegui et al.,  
 507 2017; Pickarski et al., 2015a; Turner et al., 2010; Wick et al., 2003). In addition, the late temperate stage of  
 508 both the penultimate and last interglacial is documented by continental environments with warm  
 509 evaporative summer conditions and a higher seasonality due to the vegetation shift towards the  
 510 predominance of *Pinus* (Pickarski et al., 2015a).  
 511  
 512 Despite the common vegetation succession from an early to late temperate stage, the three interglacial  
 513 periods (MIS 7 complex, MIS 5e, and MIS 1) maxima differ significantly in their vegetation composition.  
 514 One important difference of the last two interglacial vegetation assemblages is the absence of *Carpinus*  
 515 *betulus* during MIS 7e, 7c, and 7a compared to a distinct *Carpinus betulus*-phase during MIS 5e (Pickarski  
 516 et al., 2015a). In general, *Carpinus betulus* usually requires high amounts of annual rainfall (high  
 517 atmospheric humidity), and relatively high annual summer temperature, and is intolerance of late frost  
 518 (Desprat et al., 2006; Huntley and Birks, 1983). In oak-hornbeam communities, *Carpinus betulus* is  
 519 replaced as the soils are relatively dry and warm or too wet (Eaton et al., 2016). Compared to the common  
 520 hornbeam, However, deciduous *Quercus* species are 'less' sensitive to summer droughts (even below  
 521 600 mm/a; Tzedakis, 2007), and therefore, compared to *Carpinus betulus* and a decrease in humidity soil  
 522 moisture availability would favor the development of an oak steppe forest/deciduous oaks (Huntley and  
 523 Birks, 1983). Especially, the deep penetrating roots of *Quercus petraea* allow them to withstand moderate  
 524 droughts by accessing deeper water (Eaton et al., 2016). However, A changea variation in temperature is  
 525 difficult to assess because deciduous oaks at Lake Van include many species (e.g., *Quercus brantii*, *O.*  
 526 *ithaburensis*, *O. libani*, *O. robur*, *O. petraea*) with different ecological requirements (e.g., San-Miguel-  
 527 Ayanz et al., 2016). Finally, the absence of *Carpinus betulus*, the overall smaller abundances of temperate  
 528 trees (e.g., *Ulmus*), and the general low diversity within the temperate tree populations during the climate  
 529 optimum of the first penultimate interglacial compared to the last interglacial indicates warm but drier  
 530 climate conditions (similar to the Holocene). Therefore, general 'cooler/wetter' conditions of the  
 531 penultimate interglacial resulted in overall smaller abundance of temperate trees. Possible reasons for this  
 532 development could be reduced Mid June insolation (lower than Holocene level) and moderately lower  
 533 interglacial CO<sub>2</sub> content (Lang and Wolff, 2011). Moreover, general lower temperature are commonly  
 534 associated with the persistence of larger volumes of continental ice (Shackleton et al., 2000). An  
 535 exception is the second warm phase (MIS 7c), which reflects one of the largest oak steppe-forest  
 536 development (e.g., highest amplitude of deciduous *Quercus*) of the entire Lake Van pollen sequence, and  
 537 thus, represents the most humid and temperate period within the penultimate interglacial complex (see  
 538 discussion above).

**Formatiert:** Schriftart: (Standard) + Überschriften (Times New Roman)

Another important difference is the duration of each ~~full~~ interglacial period. According to Tzedakis (2005), the beginning and duration of terrestrial temperate intervals in the eastern Mediterranean region is closely linked to the amplitude of summer insolation maxima and less influenced by the timing of deglaciation. Based on this assumption, the ~~climate optimum~~ terrestrial temperate interval of ~~the all~~ penultimate interglacial stages (~~max. e. 9.6~~ 15.1 ka) is ~~e. 4 ka~~ 4600 years shorter as the terrestrial temperate interval of the last interglacial ~~interval~~ at Lake Van (~~~13.5~~ 19.7 ka, Pickarski et al., 2015a; Fig. 4).

#### 4.24.3. The penultimate glacial (MIS 6)

~~Within the~~ The following penultimate glacial ~~stage (MIS 6; PAS IV between 193.4-131.2 ka BP; (58.1-96.8 mcbf), can be correlated with the MIS 6 (Lisiecki and Raymo, 2004; Fig. 2, 3). the general~~ General lower summer insolation (Berger, 1978; Berger et al., 2007), increased global ice sheet extent (McManus et al., 1999), and decreasing atmospheric CO<sub>2</sub> content (below 230 ppm; Petit et al., 1999; Fig. 5) are responsible for ~~the~~ enhanced aridity and cooling in eastern Anatolia. Such observed climate deterioration is ~~evident-suggested~~ by the dominance of semi-desert plants (e.g., *Artemisia*, *Chenopodiaceae*) and by the ~~rapid~~ decline in temperate trees (~~AP < 20~~ mainly deciduous *Quercus* < 5%) ~~during this time~~ similar to that of the last glacial at the same site. High erosional activity (low Ca/K ratio) and decreasing paleofire activity ( $\sim 1,400$  particles cm<sup>-3</sup>) result from low vegetation cover ~~density~~ with low pollen productivity (Fig. 2, 3). As an additional local factor, the strong deficits in available plant water were possibly stored as ice/glaciers in the Bitlis mountains during the coldest phases.

~~During-Between~~ 193 and 157 ka BP, high-frequency vegetation (AP between ~1 and 18%) and environmental oscillations (e.g.,  $\delta^{18}\text{O}_{\text{bulk}}$  values between -4 to 6‰) in tree percentages between ~1 and 18 % can be observed in the pollen record in the Lake Van proxies demonstrate a reproducible pattern of centennial to millennial-scale alternation between interstadials and stadials, as recorded in the Greenland ice core sequences for the last glacial (Fig. 3; e.g., NGRIP, 2004; Rasmussen et al., 2014). Furthermore, the early penultimate glacial stage documents similar high amplitude variations in  $\delta^{18}\text{O}_{\text{bulk}}$  values (e. 4 to 6 ‰), compared to the isotope signature of MIS 7 (Fig. 3b). However, such ~~Such rapid changes in temperate plant communities, e.g. at 189.4 ka BP, resembles the pattern of interstadial to stadial stages. It indicates unstable environmental conditions with rapid alternation of slightly warmer/wetter interstadials and cooler/drier stadials at Lake Van. This situation is also reflected in several Lake Van paleoenvironmental proxies. Here, the short-term~~ In particular at 189 ka, the brief expansion of temperate trees and shrubs (deciduous *Quercus*, *Betula*, *Ulmus*, *Pinus*, and *Juniperus*; PAZ IV6, Fig. 2a, 3e) and grasses (*Poaceae*) combined with rapid variations in the fire intensity (up to 6  $\times 10^3$  particles cm<sup>-3</sup>, Fig. 3e) and decreasing terrestrial input of soil material (Fig. 3e3d), and negative  $\delta^{18}\text{O}_{\text{bulk}}$  values (-0.2‰) point

**Formatiert:** Schriftart: (Standard) + Überschriften (Times New Roman)

**Feldfunktion geändert**

**Formatiert:** Schriftart: (Standard) + Überschriften (Times New Roman)

**Feldfunktion geändert**

**Formatiert:** Schriftart: (Standard) + Überschriften (Times New Roman)

**Feldfunktion geändert**

**Formatiert:** Schriftart: (Standard) + Überschriften (Times New Roman)

**Feldfunktion geändert**

**Formatiert:** Schriftart: (Standard) + Überschriften (Times New Roman)

to short-term humid conditions and/or low evaporation within interstadials. Even if mean precipitation was low, the local available moisture was sufficient to sustain arboreal vegetation when low temperature minimized evaporation. Nevertheless, the landscape around the lake was still open ~~and less extensive~~ due to still high percentages of dry-climate adapted herbs (e.g., *Chenopodiaceae*).

In contrast, the period after 157 ka BP shows a greater abundance of steppe elements with dwarf shrubs, grasses and other herbs (e.g., *Chenopodiaceae*, *Artemisia*, *Ephedra distachya*-type) along with lower temperate tree percentages (AP c. 1-8%). The remaining tree ~~values-populations~~ consist ~~mainly-primarily~~ of deciduous *Quercus*, *Pinus*, with some scattered patches of *Betula* and *Juniperus*. The combination of minor AP ~~oscillationpercentages~~, ~~high-percentages~~the predominance of steppe plants (Fig. 2b), and reduced fire activity reflect a strong aridification and cold continental climate during the late penultimate glacial. In addition, a general low-amplitude variation of  $\delta^{18}\text{O}_{\text{bulk}}$  values (c. -2 to 2‰; Fig. 3b) and ~~an~~ overall high local erosion processes (low Ca/K ratio; Fig. 3c) refer to a rather stable period with both widespread aridity (low winter and summer precipitation) and low winter temperature across eastern Anatolia.

The Lake Van record generally agrees with high-frequency paleoenvironmental variations in the ice-core archives ~~and, with~~ high-resolution terrestrial European pollen records (e.g., Ioannina basin, Lake Ohrid; Fig. 5), ~~and with the marine pollen sequences from the Iberian margin (Margari et al., 2010)~~ in terms of ~~a~~ general-extensive aridity and cooling throughout the penultimate glacial. Our sequence also shares some features with stable isotope speleothem records from western Israel (Peqi'in and Soreq Cave; Ayalon et al., 2002; Bar-Matthews et al., 2003) ~~concerning high  $\delta^{18}\text{O}$  values that refers to dry climate conditions.~~ Similar to the Lake Van  $\delta^{18}\text{O}_{\text{bulk}}$  values, the Soreq and Peqi'in record also show distinct climate variability, especially at the beginning of the MIS 6 (Fig. 5). In addition, several high-resolution terrestrial records document a further period of abrupt warming events between 155-150 ka BP. In particular, the Tenaghi Philippon profile illustrates a prominent increase of up to 60% in arboreal pollen, which coincides with increased rainfall at Yammouneh (Gasse et al., 2015) and at Peqi'in Cave (Bar-Matthews et al., 2003). At Lake Van, only a weakened short-term oscillation can be detected in the Ca/K ratio during that time.

#### Comparison of the last two glacial intervals at Lake Van

~~Compared to interglacial stages, forest vegetation cover was generally reduced during the glacial.~~ The occurrence of high-frequency climate changes within the Lake Van sediments provides an opportunity to compare the vegetation history of the last two glacial periods. Fig. 6 illustrates that the first part of the penultimate glacial (c. 193-157 ka ~~BP~~) resembles MIS 3, regarding ~~pronounced~~ millennial-scale AP oscillations and abruptness of the transitions in the pollen record. The series of ~~millennial-scale~~ interstadial-stadial intervals can be recognized in both glacial periods. This variability is mainly

Formatiert: Schriftart: (Standard) +Überschriften (Times New Roman)

607 influenced by the impact of North Atlantic current oscillations and the extension of atmospheric pattern, in  
 608 particular, northward shift of the polar front in eastern Anatolia (e.g., Cacho et al., 2000, 1999; Chapman  
 609 and Shackleton, 1999; McManus et al., 1999; Rasmussen et al., 2014; Wolff et al., 2010).  
 610 The ~~longest and~~ most distinct environmental variability occurs during MIS 6e (c. 179-159 ka BP),  
 611 which can be further divided into six interstadials based on rapid changes in the marine core MD01-2444  
 612 off Portugal (Margari et al., 2010; Roucoux et al., 2011; Fig. 6). They document abrupt climate  
 613 oscillations below orbital cycles similar to the Dansgaard-Oeschger (DO) events or Greenland  
 614 Interstadials (GI) over the last glacial stage (e.g., Dansgaard et al., 1993; Rasmussen et al., 2014; Wolff et  
 615 al., 2010). At Lake Van, the MIS 6e reveals a clear evidence of abrupt climate variability due to rapid  
 616 alternation in abiotic and biotic proxies such as oxygen isotopes, Ca/K ratio, and pollen data. The vegetation  
 617 cover is similar to the largest Dansgaard-Oeschger (DO) events 17 to 12 during MIS 3 (c. 60-44 ka BP;  
 618 Pickarski et al., 2015b). Both intervals, MIS 6e and MIS 3, started at the point of summer insolation  
 619 maxima. Here, the Northern Hemisphere insolation values reached interglacial level at the beginning of  
 620 MIS 6e compared to comparable with the MIS 7e (Fig. 5). In contrast, the interstadial-stadial pattern  
 621 during the late MIS 6 oscillated at lower intensities amplitude, similar to rates of change in the Dansgaard-  
 622 Oeschger (DO) events during MIS 4 and 2, reflecting a general global climatic cooling.  
 623 Within the MIS 6e, the subdued temperate tree pollen oscillations consist mainly of deciduous *Quercus*  
 624 and *Pinus*, range between ~1% and ~15%. In contrast, the identical AP composition oscillates between  
 625 ~1% and ~10% during the orbitally equivalent MIS 3 (c. 61-28 ka BP; Pickarski et al., 2015b). The  
 626 different amplitude in arboreal pollen percentages in both glacial stages and a general dense temperate  
 627 grass steppe during the MIS 6e is supported by suggest more abundant summer available moisture (Fig. 6).  
 628 The general depleted Depleted isotope signature may result from summer meltwater discharge from local  
 629 glaciers (e.g., Taurus mountains, Bitlis Massif) or by increased precipitation identified by climate  
 630 modeling experiments over the entire eastern Mediterranean basin (e.g., Stockhecke et al., 2016) (Kallel et  
 631 al., 2000). However, the presence of *Artemisia* and *Poaceae* makes it difficult to disentangle the effects of  
 632 warming from changes in moisture availability in both glacials. Nevertheless, the occurrence abundance of  
 633 cold-tolerant taxa such as *Pinus*, *Ephedra distachya*-type, and as well as the cold-tolerant algae  
 634 *Pseudopediatrum kawraiskyi* points to a general picture of cold but 'wet' indicates colder/wetter climate  
 635 conditions during MIS 6e than experienced during compared to MIS 3.  
 636 Evidence for relatively humid but cold climate conditions during MIS 6e agrees with several other  
 637 paleoclimate studies from the Mediterranean area. For example, the occurrence of open forest vegetation  
 638 associated with wetter climate is indicated at, e.g., Tenaghi Philippon (Tzedakis et al., 2006, 2003b) and  
 639 Ioannina (Roucoux et al., 2011). In addition, isotopic evidence of the stalagmites record from the Soreq  
 640 Cave (Israel) shows an increase in precipitation enhanced rainfall (negative shift in the  $\delta^{18}\text{O}$  values) in the  
 641 eastern Mediterranean at ~177 ka and between 166-157 ka BP (Fig. 5; Ayalon et al., 2002; Bar-Matthews

**Formatiert:** Schriftart: (Standard) + Überschriften (Times New Roman)

**Feldfunktion geändert**

**Formatiert:** Schriftart: (Standard) + Überschriften (Times New Roman)



et al., 2003). Furthermore, a pluvial phase is also inferred from a prominent speleothem  $\delta^{18}\text{O}$  excursion in the Argentarola Cave (Italy) between 180 and 170 ka BP based on U/Th dating (Bard et al., 2002). This phase coincides with ~~high runoff~~ maximum rainfall conditions during MIS 6.5 event, coeval with ~~due to~~ the deposition of the 'cold' sapropel layer (S6; c. ~176 ka BP) in the western and eastern Mediterranean basin (Ayalon et al., 2002; Bard et al., 2002). Finally, the progressive decline in effective moisture is a result of the combined effect of temperature, precipitation and insolation changes in the Lake Van region.

## 5. Conclusions

1. The new high-resolution Lake Van pollen record provides a unique sequence of the penultimate interglacial-glacial cycle in eastern Anatolia (broadly equivalent to the MIS 7 and MIS 6) that fills the gap in data coverage between the northern Levant and southern Europe. It reveals three steppe-forested intervals that can be correlated with MIS 7e, 7c, and 7a. Intervening periods of more open, herbaceous vegetation are correlated with MIS 7d and 7b.
  2. All climate-related variables at Lake Van varied at interglacial/interstadial glacial/stadial scale. During the MIS 7 penultimate interglacial complex, high local and regional effective soil moisture availability is evidenced evident by a dense well-developed temperate oak steppe-forest with pistachio and juniper, high charcoal accumulation, and reduced physical erosion during the climate optima.
  3. In contrast to south-western Europe, all three terrestrial warm intervals of MIS 7 are characterized by clear interglacial conditions. The largest oak steppe-forest expansion in the Lake Van region within the penultimate interglacial complex occurred during the terrestrial equivalent of the MIS 7c instead of MIS 7e. This underlines the different environmental response to global climate change in the continental setting of the Near East compared to global ice volume and/or greenhouse gas.
  4. The eastern Mediterranean Lake Van pollen sequence is in line with data from long-term climate records from southern Europe and the northern Levant, in terms of vegetation changes, orbitally-induced fluctuations, and atmospheric changes over the North Atlantic system. However, the diversity of tree taxa in the Lake Van pollen spectra seems to be rather low compared to southern European terrestrial interglacials and their forest development.
- ~~Each warm stage is characterized by a succession of vegetation types: (I) pioneer and sclerophyllous taxa, (II) temperate tree expansion dominated by deciduous *Quercus*, (III) *Pinus*-dominated landscapes, and (IV) steppe vegetation. The comparison of past interglacials at Lake Van suggests wet and colder conditions during the penultimate interglacial, strong thermal and hydrological seasonal contrasts during the last interglacial, and a higher humidity during the Holocene climate optimum (at 6 ka cal. BP; Litt et al., 2009).~~

**Formatiert:** Schriftart: (Standard) + Überschriften (Times New Roman)

**Formatiert:** Listenabsatz, Abstand zwischen Absätzen gleicher Formatierung einfügen, Nummerierte Liste + Ebene: 1 + Nummerierungsformatvorlage: 1, 2, 3, ... + Beginnen bei: 1 + Ausrichtung: Links + Ausgerichtet an: 0,63 cm + Einzug bei: 1,27 cm

**Formatiert:** Schriftart: (Standard) + Überschriften (Times New Roman)

**Formatiert:** Listenabsatz, Abstand zwischen Absätzen gleicher Formatierung einfügen, Nummerierte Liste + Ebene: 1 + Nummerierungsformatvorlage: 1, 2, 3, ... + Beginnen bei: 1 + Ausrichtung: Links + Ausgerichtet an: 0,63 cm + Einzug bei: 1,27 cm



5. During the penultimate glacial, a strong aridification and cold climate conditions are inferred from open desert-steppe vegetation that favors physical erosion and local terrigenous inputs. In particular, our record reveals a pattern of subdued but higher temperate oscillations between 193-157 ka BP, followed by a period of lower tree variations and expansion the predominance of desert-steppe from 157-131 ka BP that highlighted Dansgaard-Oeschger-like events during the MIS 6.

A comparison between the last two glacials highlights differences in vegetation responses in eastern Anatolia. The first part of MIS 6 including the MIS 6e event may point to cooler but relatively wetter conditions than experienced during the MIS 3.

Finally, the eastern Mediterranean Lake Van pollen sequence is in line with data from long-term climate records from southern Europe and the northern Levant, in terms of vegetation changes, orbitally induced fluctuations, global ice sheet waxing and waning, and atmospheric changes over the North Atlantic system.

**Formatiert:** Schriftart: (Standard) + Überschriften (Times New Roman)

**Formatiert:** Listenabsatz, Nummerierte Liste + Ebene: 1 + Nummerierungsformatvorlage: 1, 2, 3, ... + Beginnen bei: 1 + Ausrichtung: Links + Ausgerichtet an: 0,63 cm + Einzug bei: 1,27 cm

**Data availability:** The complete pollen data set is available online on the PANGAEA database (<https://doi.org/10.1594/PANGAEA.871228>). at.... (www.pangaea.de).

## Acknowledgements

Financial support was provided by the German Research Foundation (DFG; LI 582/20-1). We thank all colleagues and scientific teams who have been involved in the Lake Van drilling, core opening and sampling campaigns. We thank Dr. Nils Andersen and his working team at the Leibnitz-Laboratory for the isotopic measurements. We acknowledge Vera Pospelova and Fabienne Marret-Davies for their help to identify dinoflagellate cysts. We thank Karen Schmeling for preparing excellent pollen samples, Christoph Steinhoff and Helen Böttcher for their support in the lab. Special thanks go to Ola Kwiecien and Georg Heumann for their critical reading of the manuscript and for the inspiring discussions. Patricia Pawlyk, as a native speaker, is thanked for proof reading the English. We are grateful to Mira-Miryam Bar-Matthews and Avner Ayalon from the Geological Survey of Israel (Jerusalem) for the supply of the oxygen isotope data of the Soreq and Peqi'in record. The authors are grateful to Nathalie Combourieu-Nebout for editing of the manuscript. Donatella Magri, Gonzalo Jiménez-Moreno and two anonymous reviewers are acknowledged for their constructive comments and useful recommendations, which improved the quality of the manuscript.

## References

Altiner, Y., Söhne, W., Güney, C., Perl, J., Wang, R., Muzli, M., 2013. A geodetic study of the 23 October 2011 Van, Turkey earthquake. Tectonophysics 588, 118–134. doi:10.1016/j.tecto.2012.12.005

**Formatiert:** Literaturverzeichnis, Absatzkontrolle, Abstand zwischen asiatischem und westlichem Text anpassen, Abstand zwischen asiatischem Text und Zahlen anpassen

Feldfunktion geändert

- Arranz-Otaegui, A., López-Sáez, J.A., Araus, J.L., Portillo, M., Balbo, A., Iriarte, E., Gourichon, L., Braemer, F., Zapata, L., Ibáñez, J.J., 2017. Landscape transformations at the dawn of agriculture in southern Syria (10.7–9.9 ka cal. BP): Plant-specific responses to the impact of human activities and climate change. *Quaternary Science Reviews* 158, 145–163. doi:10.1016/j.quascirev.2017.01.001
- Ayalon, A., Bar-Matthews, M., Kaufman, A., 2002. Climatic conditions during marine oxygen isotope stage 6 in the eastern Mediterranean region from the isotopic composition of speleothems of Soreq Cave, Israel. *Geology* 30, 303–306. doi:10.1130/0091-7613(2002)030<0303:CCDMOI>2.0.CO;2
- Bar-Matthews, M., Ayalon, A., Gilmour, M., Matthews, A., Hawkesworth, C.J., 2003. Sea–land oxygen isotopic relationships from planktonic foraminifera and speleothems in the Eastern Mediterranean region and their implication for paleorainfall during interglacial intervals. *Geochimica et Cosmochimica Acta* 67, 3181–3199. doi:10.1016/S0016-7037(02)01031-1
- Bard, E., Delaygue, G., Rostek, F., Antonioli, F., Silenzi, S., Schrag, D.P., 2002. Hydrological conditions over the western Mediterranean basin during the deposition of the cold Sapropel 6 (ca. 175 kyr BP). *Earth and Planetary Science Letters* 202, 481–494. doi:10.1016/S0012-821X(02)00788-4
- Barker, S., Knorr, G., Edwards, R.L., Parrenin, F., Putnam, A.E., Skinner, L.C., Wolff, E., Ziegler, M., 2011. 800,000 Years of Abrupt Climate Variability. *Science* 334, 347–351. doi:10.1126/science.1203580
- Bennett, K.D., Tzedakis, P.C., Willis, K.J., 1991. Quaternary refugia of north European trees. *Journal of Biogeography* 103–115. doi:10.2307/2845248
- Berger, A., 1978. Long-term variations of daily insolation and Quaternary climate changes. *Journal of Atmospheric Sciences* 35, 2362–2367. doi:10.1175/1520-0469(1978)035<2362:LTVODI>2.0.CO;2
- Berger, A., Louté, M.F., Kaspar, F., Lorenz, S.J., 2007. Insolation During Interglacial, in: Sirocko, F., Claussen, M., Sánchez Goñi, M.F., Litt, T. (Eds.), *The Climate of Past Interglacial*. Elsevier, Amsterdam, pp. 13–27.
- Berglund, B.E., Ralska-Jasiewiczowa, M., 1986. Pollen analysis and pollen diagrams, in: Berglund, B.E., Ralska-Jasiewiczowa, M. (Eds.), *Handbook of Holocene Palaeoecology and Palaeohydrology*. John Wiley and Sons, pp. 455–484.
- Beug, H.-J., 2004. Leitfaden der Pollenbestimmung für Mitteleuropa und angrenzende Gebiete. Pfeil, München.
- Cacho, I., Grimalt, J.O., Pelejero, C., Canals, M., Sierro, F.J., Flores, J.A., Shackleton, N., 1999. Dansgaard-Oeschger and Heinrich event imprints in Alboran Sea paleotemperatures. *Paleoceanography* 14, 698–705. doi:10.1029/1999PA900044
- Cacho, I., Grimalt, J.O., Sierro, F.J., Shackleton, N.J., Canals, M., 2000. Evidence for enhanced Mediterranean thermohaline circulation during rapid climatic coolings. *Earth and Planetary Science Letters* 183, 417–429. doi:10.1016/S0012-821X(00)00296-X
- Chapman, M.R., Shackleton, N.J., 1999. Global ice-volume fluctuations, North Atlantic ice-rafting events, and deep-ocean circulation changes between 130 and 70 ka. *Geology* 27, 795–798. doi:10.1130/0091-7613(1999)027<0795:GIVFNA>2.3.CO;2
- Dale, B., 2001. The sedimentary record of dinoflagellate cysts: looking back into the future of phytoplankton blooms. *Scientia Marina* 65, 257–272. doi:10.3989/scimar.2001.65s2257
- Dansgaard, W., Johnsen, S.J., Clausen, H.B., Dahl-Jensen, D., Gundestrup, N.S., Hammer, C.U., Hvidberg, C.S., Steffensen, J.P., Sveinbjörnsdottir, A.E., Jouzel, J., Bond, G., 1993. Evidence for general instability of past climate from a 250-kyr ice-core record. *Nature* 364, 218–220.
- Denton, G.H., Anderson, R.F., Toggweiler, J.R., Edwards, R.L., Schaefer, J.M., Putnam, A.E., 2010. The Last Glacial Termination. *Science* 328, 1652. doi:10.1126/science.1184119
- Desprat, S., Sánchez Goñi, M.F., Turon, J.-L., Duprat, J., Malaizé, B., Peypouquet, J.-P., 2006. Climatic variability of Marine Isotope Stage 7: direct land–sea–ice correlation from a multiproxy analysis of a north-western Iberian margin deep-sea core. *Quaternary Science Reviews* 25, 1010–1026. doi:10.1016/j.quascirev.2006.01.001

- Eaton, E., Caudullo, G., Oliveira, S., de Rigo, D., 2016. *Quercus robur* and *Quercus petraea* in Europe: distribution, habitat, usage and threats, in: San-Miguel-Ayanz, J., de Rigo, D., Caudullo, G., Houston Durrant, T., Mauri, A. (Eds.), *European Atlas of Forest Tree Species*. Publication Office of the European Union, Luxembourg, pp. 160–163.
- El-Moslimany, A., 1986. Ecology and late-Quaternary history of the Kurdo-Zagrosian oak forest near Lake Zeribar, western Iran. *Vegetatio* 68, 55–63. doi:10.1007/BF00031580
- Fægri, K., Iversen, J., 1989. *Textbook of Pollen Analysis*. The Blackburn Press.
- Follieri, M., Magri, D., Sadori, L., 1988. 250,000-year pollen record from Valle di Castiglione Roma. *Pollen et Spores* 30, 329–356.
- Frey, W., Kürschner, H., 1989. *Die Vegetation im Vorderer Orient. Erläuterungen zur Karte A VI 1 Vorderer Orient. Vegetation des "Tübinger Atlas des Vorderen Orients"*, Reihe A. Tübinger Atlas des Vorderen Orients, Wiesbaden.
- Frogley, M.R., Tzedakis, P.C., Heaton, T.H.E., 1999. Climate Variability in Northwest Greece During the Last Interglacial. *Science* 285, 1886–1889. doi:10.1126/science.285.5435.1886
- Gasse, F., Vidal, L., Develle, A.-L., Van Campo, E., 2011. Hydrological variability in the Northern Levant: a 250 ka multiproxy record from the Yammouneh (Lebanon) sedimentary sequence. *Climate of the Past* 7, 1261–1284. doi:10.5194/cp-7-1261-2011
- Gasse, F., Vidal, L., Van Campo, E., Demory, F., Develle, A.-L., Tachikawa, K., Elias, A., Bard, E., Garcia, M., Sonzogni, C., Thouveny, N., 2015. Hydroclimatic changes in northern Levant over the past 400,000 years. *Quaternary Science Reviews* 111, 1–8. doi:10.1016/j.quascirev.2014.12.019
- Giorgi, F., Lionello, P., 2008. Climate change projections for the Mediterranean region. *Global and Planetary Change* 63, 90–104. doi:10.1016/j.gloplacha.2007.09.005
- Huntley, B., Birks, H.J.B., 1983. *An Atlas of Past and Present Pollen Maps for Europe: 0-13,000 BP Yeras Ago*. Cambridge University Press, Cambridge.
- Jessen, A., Milthers, V., 1928. Stratigraphical and paleontological studies of interglacial freshwater deposits in Jutland and Northwest Germany. *Danmarks Geologiske Undersøgelse* 48, 1–379.
- Jouzel, J., Masson-Delmotte, V., Cattani, O., Dreyfus, G., Falourd, S., Hoffmann, G., Minster, B., Nouet, J., Barnola, J.M., Chappellaz, J., Fischer, H., Gallet, J.C., Johnsen, S., Leuenberger, M., Loulergue, L., Luthi, D., Oerter, H., Parrenin, F., Raisbeck, G., Raynaud, D., Schilt, A., Schwander, J., Selmo, E., Souchez, R., Spahni, R., Stauffer, B., Steffensen, J.P., Stenni, B., Stocker, T.F., Tison, J.L., Werner, M., Wolff, E.W., 2007. Orbital and Millennial Antarctic Climate Variability over the Past 800,000 Years. *Science* 317, 793–796. doi:10.1126/science.1141038
- Kwiecien, O., Stockhecke, M., Pickarski, N., Heumann, G., Litt, T., Sturm, M., Anselmetti, F., Kipfer, R., Haug, G.H., 2014. Dynamics of the last four glacial terminations recorded in Lake Van, Turkey. *Quaternary Science Reviews* 104, 42–52. doi:10.1016/j.quascirev.2014.07.001
- Lang, N., Wolff, E.W., 2011. Interglacial and glacial variability from the last 800 ka in marine, ice and terrestrial archives. *Climate of the Past* 7, 361–380. doi:10.5194/cp-7-361-2011
- Lemcke, G., Sturm, M., 1997.  $\delta$  18O and trace element measurements as proxy for the reconstruction of climate changes at Lake Van (Turkey): preliminary results., in: Dalfes, H.N., Kulka, G., Weiss, H. (Eds.), *Third Millennium BC Climate Change and Old World Collapse*. NATO ASI Series, pp. 653–679.
- Leng, M.J., Marshall, J.D., 2004. Palaeoclimate interpretation of stable isotope data from lake sediment archives. *Quaternary Science Reviews* 23, 811–831. doi:10.1016/j.quascirev.2003.06.012
- Lisiecki, L.E., Raymo, M.E., 2004. A Plio-Pleistocene Stack of 57 Globally Distributed Benthic  $\delta$  18O Records. *Paleoceanography* 20, 1–16.
- Litt, T., Anselmetti, F.S., 2014. Lake Van deep drilling project PALEOVAN. *Quaternary Science Reviews* 104, 1–7. doi:10.1016/j.quascirev.2014.09.026
- Litt, T., Anselmetti, F.S., Baumgarten, H., Beer, J., Cagatay, N., Cukur, D., Damci, E., Glombitza, C., Haug, G., Heumann, G., Kallmeyer, J., Kipfer, R., Krastel, S., Kwiecien, O., Meydan, A.F., Orcen, S., Pickarski, N., Randlett, M.-E., Schmincke, H.-U., Schubert, C.J., Sturm, M., Sumita, M., Stockhecke, M., Tomonaga, Y., Vigliotti, L., Wonik, T., team, the P. scientific, 2012.

500,000 Years of Environmental History in Eastern Anatolia: The PALEOVAN Drilling Project. *Scientific Drilling Journal* 18–29. doi:10.5194/sd-14-18-2012

Litt, T., Krastel, S., Sturm, M., Kipfer, R., Örcen, S., Heumann, G., Franz, S.O., Ülgen, U.B., Niessen, F., 2009. “PALEOVAN”. International Continental Scientific Drilling Program (ICDP): site survey results and perspectives. *Quaternary Science Reviews* 28, 1555–1567. doi:10.1016/j.quascirev.2009.03.002

Litt, T., Pickarski, N., Heumann, G., Stockhecke, M., Tzedakis, P.C., 2014. A 600,000 year long continental pollen record from Lake Van, eastern Anatolia (Turkey). *Quaternary Science Reviews* 104, 30–41. doi:10.1016/j.quascirev.2014.03.017

Lowe, J.J., Walker, M.J.C., 1984. *Reconstructing Quaternary Environments*, 2nd ed. Longman, Edinburgh.

Margari, V., Skinner, L.C., Tzedakis, P.C., Ganopolski, A., Vautravers, M., Shackleton, N.J., 2010. The nature of millennial-scale climate variability during the past two glacial periods. *Nature Geoscience* 3, 127–131. doi:10.1038/ngeo740

Martinson, D.G., Pisias, N.G., Hays, J.D., Imbrie, J., Moore Jr., T.C., Shackleton, N.J., 1987. Age dating and the orbital theory of the ice ages: Development of a high-resolution 0 to 300,000-year chronostratigraphy. *Quaternary Research* 27, 1–29. doi:10.1016/0033-5894(87)90046-9

McManus, J.F., Oppo, D.W., Cullen, J.L., 1999. A 0.5-Million-Year Record of Millennial-Scale Climate Variability in the North Atlantic. *Science* 283, 971–975. doi:10.1126/science.283.5404.971

Milner, A.M., Müller, U.C., Roucoux, K.H., Collier, R.E.L., Pross, J., Kalaitzidis, S., Christanis, K., Tzedakis, P.C., 2013. Environmental variability during the Last Interglacial: a new high-resolution pollen record from Tenaghi Philippon, Greece. *Journal of Quaternary Science* 28, 113–117. doi:10.1002/jqs.2617

Moore, P.D., Webb, J.A., Collinson, M.E., 1991. *Pollen Analysis*. Blackwell Science.

NGRIP, 2004. High-resolution record of Northern Hemisphere climate extending into the last interglacial period. *Nature* 431, 147–151. doi:10.1038/nature02805

Petit, J.R., Jouzel, J., Raynaud, D., Barkov, N.I., Barnola, J.-M., Basile, I., Bender, M., Chappellaz, J., Davis, M., Delaygue, G., Delmotte, M., Kotlyakov, V.M., Legrand, M., Lipenkov, V.Y., Lorius, C., Pepin, L., Ritz, C., Saltzman, E., Stevenard, M., 1999. Climate and atmospheric history of the past 420,000 years from the Vostok ice core, Antarctica. *Nature* 399, 429–436. doi:10.1038/20859

Pickarski, N., Kwiecien, O., Djamali, M., Litt, T., 2015a. Vegetation and environmental changes during the last interglacial in eastern Anatolia (Turkey): a new high-resolution pollen record from Lake Van. *Palaeogeography, Palaeoclimatology, Palaeoecology* 145–158. doi:10.1016/j.palaeo.2015.06.015

Pickarski, N., Kwiecien, O., Langgut, D., Litt, T., 2015b. Abrupt climate and vegetation variability of eastern Anatolia during the last glacial. *Climate of the Past* 11, 1491–1505. doi:10.5194/cp-11-1491-2015

Punt, W., 1976. *The Northwest European Pollen Flora*. Elsevier, Amsterdam.

Rasmussen, S.O., Bigler, M., Blockley, S.P., Blunier, T., Buchardt, S.L., Clausen, H.B., Cvijanovic, I., Dahl-Jensen, D., Johnsen, S.J., Fischer, H., Gkinis, V., Guillevic, M., Hoek, W.Z., Lowe, J.J., Pedro, J.B., Popp, T., Seierstad, I.K., Steffensen, J.P., Svensson, A.M., Vallelonga, P., Vinther, B.M., Walker, M.J.C., Wheatley, J.J., Winstrup, M., 2014. A stratigraphic framework for abrupt climatic changes during the Last Glacial period based on three synchronized Greenland ice-core records: refining and extending the INTIMATE event stratigraphy. *Quaternary Science Reviews* 106, 14–28. doi:10.1016/j.quascirev.2014.09.007

Reilinger, R., McClusky, S., Vernant, P., Lawrence, S., Ergintav, S., Cakmak, R., Ozener, H., Kadirov, F., Guliev, I., Stepanyan, R., Nadariya, M., Hahubia, G., Mahmoud, S., Sakr, K., ArRajehi, A., Paradissis, D., Al-Aydrus, A., Prilepin, M., Guseva, T., Evren, E., Dmitrova, A., Filikov, S.V., Gomez, F., Al-Ghazzi, R., Karam, G., 2006. GPS constraints on continental deformation in the Africa-Arabia-Eurasia continental collision zone and implications for the dynamics of plate interactions. *Journal of Geophysical Research* 111, 1–26. doi:10.1029/2005JB004051

- Reille, M., 1999. Pollen et spores d'Europe et d'Afrique du Nord. Laboratoire de Botanique Historique et Palynologie, Marseille.
- Reille, M., 1998. Pollen et spores d'Europe et d'Afrique du Nord (Supplement 2). Laboratoire de Botanique Historique et Palynologie, Marseille.
- Reille, M., 1995. Pollen et spores d'Europe et d'Afrique du Nord (Supplement 1). Laboratoire de Botanique Historique et Palynologie, Marseille.
- Reille, M., de Beaulieu, J., Svobodova, H., Andrieu-Ponel, V., Goeury, C., 2000. Pollen analytical biostratigraphy of the last five climatic cycles from a long continental sequence from the Velay region (Massif Central, France). *Journal of Quaternary Science* 15, 665–685.
- Roberts, N., Jones, M.D., Benkaddour, A., Eastwood, W.J., Filippi, M.L., Frogley, M.R., Lamb, H.F., Leng, M.J., Reed, J.M., Stein, M., Stevens, L., Valero-Garcés, B., Zanchetta, G., 2008. Stable isotope records of Late Quaternary climate and hydrology from Mediterranean lakes: the ISOMED synthesis. *Quaternary Science Reviews* 27, 2426–2441. doi:10.1016/j.quascirev.2008.09.005
- Roucoux, K.H., Tzedakis, P.C., Frogley, M.R., Lawson, I.T., Preece, R.C., 2008. Vegetation history of the marine isotope stage 7 interglacial complex at Ioannina, NW Greece. *Quaternary Science Reviews* 27, 1378–1395. doi:10.1016/j.quascirev.2008.04.002
- Roucoux, K.H., Tzedakis, P.C., Lawson, I.T., Margari, V., 2011. Vegetation history of the penultimate glacial period (Marine isotope stage 6) at Ioannina, north-west Greece. *Journal of Quaternary Science* 26, 616–626. doi:10.1002/jqs.1483
- Sadori, L., Koutsodendris, A., Panagiotopoulos, K., Masi, A., Bertini, A., Combourieu-Nebout, N., Francke, A., Kouli, K., Joannin, S., Mercuri, A.M., Peyron, O., Torri, P., Wagner, B., Zanchetta, G., Sinopoli, G., Donders, T.H., 2016. Pollen-based paleoenvironmental and paleoclimatic change at Lake Ohrid (south-eastern Europe) during the past 500 ka. *Biogeosciences* 13, 1423–1437. doi:10.5194/bg-13-1423-2016
- Sánchez Goñi, M.F., Cacho, I., Turon, J.-L., Guiot, J., Sierro, F.J., Peyrouquet, J.-P., Grimalt, J.O., Shackleton, N.J., 2002. Synchronicity between marine and terrestrial responses to millennial scale climatic variability during the last glacial period in the Mediterranean region. *Climate Dynamics* 19, 95–105. doi:DOI 10.1007/s00382-001-0212-x
- Sánchez Goñi, M.F., Eynaud, F., Turon, J.-L., Shackleton, N.J., 1999. High resolution palynological record off the Iberian margin: direct land-sea correlation for the Last Interglacial complex. *Earth and Planetary Science Letters* 171, 123–137. doi:10.1016/S0012-821X(99)00141-7
- San-Miguel-Ayanz, J., de Rigo, D., Caudullo, G., Houston Durrant, T., Mauri, A., 2016. European Atlas of Forest Tree Species. Publication Office of the European Union, Luxembourg.
- Shackleton, N.J., Hall, M.A., Vincent, E., 2000. Phase relationships between millennial-scale events 64,000–24,000 years ago. *Paleoceanography* 15, 565–569. doi:10.1029/2000PA000513
- Shackleton, N.J., Sánchez-Goñi, M.F., Pailler, D., Lancelot, Y., 2003. Marine Isotope Substage 5e and the Eemian Interglacial. *THE EEMIAN INTERGLACIAL: A GLOBAL PERSPECTIVE* 36, 151–155. doi:10.1016/S0921-8181(02)00181-9
- Shumilovskikh, L.S., Tarasov, P., Arz, H.W., Fleitmann, D., Marret, F., Nowaczyk, N., Plessen, B., Schlütz, F., Behling, H., 2012. Vegetation and environmental dynamics in the southern Black Sea region since 18 kyr BP derived from the marine core 22-GC3. *Palaeogeography, Palaeoclimatology, Palaeoecology* 337–338, 177–193. doi:10.1016/j.palaeo.2012.04.015
- Stockhecke, M., Kwiecien, O., Vigliotti, L., Anselmetti, F.S., Beer, J., Cağatay, M.N., Channell, J.E.T., Kipfer, R., Lachner, J., Litt, T., Pickarski, N., Sturm, M., 2014a. Chronostratigraphy of the 600,000 year old continental record of Lake Van (Turkey). *Quaternary Science Reviews* 104, 8–17. doi:10.1016/j.quascirev.2014.04.008
- Stockhecke, M., Sturm, M., Brunner, I., Schmincke, H.-U., Sumita, M., Kipfer, R., Cukur, D., Kwiecien, O., Anselmetti, F.S., 2014b. Sedimentary evolution and environmental history of Lake Van (Turkey) over the past 600 000 years. *Sedimentology* 61, 1830–1861. doi:10.1111/sed.12118
- Stockhecke, M., Timmermann, A., Kipfer, R., Haug, G.H., Kwiecien, O., Friedrich, T., Menviel, L., Litt, T., Pickarski, N., Anselmetti, F.S., 2016. Millennial to orbital-scale variations of drought intensity

in the Eastern Mediterranean. *Quaternary Science Reviews* 133, 77–95.  
doi:10.1016/j.quascirev.2015.12.016

Stockmarr, J., 1971. Tablets with spores used in absolute pollen analysis. *Pollen et Spores* 13, 615–621.

Thouveny, N., Carcaillet, J., Moreno, E., Leduc, G., Nérini, D., 2004. Geomagnetic moment variation and paleomagnetic excursions since 400 kyr BP: a stacked record from sedimentary sequences of the Portuguese margin. *Earth and Planetary Science Letters* 219, 377–396. doi:10.1016/S0012-821X(03)00701-5

Turner, R., Roberts, N., Eastwood, W.J., Jenkins, E., Rosen, A., 2010. Fire, climate and the origins of agriculture: micro-charcoal records of biomass burning during the last glacial–interglacial transition in Southwest Asia. *Journal of Quaternary Science* 25, 371–386. doi:10.1002/jqs.1332

Tzedakis, P.C., 2007. Seven ambiguities in the Mediterranean palaeoenvironmental narrative. *Quaternary Science Reviews* 26, 2042–2066. doi:10.1016/j.quascirev.2007.03.014

Tzedakis, P.C., 2005. Towards an understanding of the response of southern European vegetation to orbital and suborbital climate variability. *Quaternary Science Reviews* 24, 1585–1599. doi:10.1016/j.quascirev.2004.11.012

Tzedakis, P.C., 1994. Hierarchical biostratigraphical classification of long pollen sequences. *Journal of Quaternary Science* 9, 257–259. doi:10.1002/jqs.3390090306

Tzedakis, P.C., Andrieu, V., de Beaulieu, J.-L., Birks, H.J.B., Crowhurst, S., Follieri, M., Hooghiemstra, H., Magri, D., Reille, M., Sadori, L., Shackleton, N.J., Wilmstra, T.A., 2001. Establishing a terrestrial chronological framework as a basis for biostratigraphical comparisons. *European Quaternary Biostratigraphy* 20, 1583–1592.

Tzedakis, P.C., Andrieu, V., de Beaulieu, J.-L., Crowhurst, S., Follieri, M., Hooghiemstra, H., Magri, D., Reille, M., Sadori, L., Shackleton, N.J., Wilmstra, T.A., 1997. Comparison of terrestrial and marine records of changing climate of the last 500,000 years. *Earth and Planetary Science Letters* 150, 171–176.

Tzedakis, P.C., Frogley, M.R., Heaton, T.H.E., 2003a. Last Interglacial conditions in southern Europe: evidence from Ioannina, northwest Greece. *Global and Planetary Change* 36, 157–170. doi:10.1016/S0921-8181(02)00182-0

Tzedakis, P.C., Hooghiemstra, H., Palike, H., 2006. The last 1.35 million years at Tenaghi Philippon: revised chronostratigraphy and long-term vegetation trends. *Critical Quaternary Stratigraphy* 25, 3416–3430. doi:10.1016/j.quascirev.2006.09.002

Tzedakis, P.C., Lawson, I.T., Frogley, M.R., Hewitt, G.M., Preece, R.C., 2002. Buffered Tree Population Changes in a Quaternary Refugium: Evolutionary Implications. *Science* 297, 2044–2047. doi:10.1126/science.1073083

Tzedakis, P.C., McManus, J.F., Hooghiemstra, H., Oppo, D.W., Wilmstra, T.A., 2003b. Comparison of changes in vegetation in northeast Greece with records of climate variability on orbital and suborbital frequencies over the last 450 000 years. *Earth and Planetary Science Letters* 212, 197–212. doi:10.1016/S0012-821X(03)00233-4

Van Zeist, W., Bottema, S., 1991. Late Quaternary vegetation of the Near East. *Beihefte zum Tübinger Atlas des Vorderen Orients* 18, 11–156.

Vigliotti, L., Channell, J.E.T., Stockhecke, M., 2014. Paleomagnetism of Lake Van sediments: chronology and paleoenvironment since 350 ka. *Quaternary Science Reviews* 104, 18–29. doi:10.1016/j.quascirev.2014.09.028

Walker, M., Johnsen, S., Rasmussen, S.O., Popp, T., Steffensen, J.P., Gibbard, P., Hoek, W., Lowe, J., Andrews, J., Björck, S., Cwynar, L.C., Hughen, K., Kershaw, P., Kromer, B., Litt, T., Lowe, D.J., Nakagawa, T., Newnham, R., Schwander, J., 2009. Formal definition and dating of the GSSP (Global Stratotype Section and Point) for the base of the Holocene using the Greenland NGRIP ice core, and selected auxiliary records. *J. Quaternary Sci.* 24, 3–17.

Wick, L., Lemcke, G., Sturm, M., 2003. Evidence of Lateglacial and Holocene climatic change and human impact in eastern Anatolia: high resolution pollen, charcoal, isotopic and geochemical records from the laminated sediments of Lake Van. *The Holocene* 13, 665–675. doi:10.1191/0959683603hl653rp



968 Wolff, E.W., Chappellaz, J., Blunier, T., Rasmussen, S.O., Svensson, A., 2010. Millennial-scale  
969 variability during the last glacial: The ice core record. *Quaternary Sciences Reviews* 29, 2828–  
970 2838. doi:10.1016/j.quascirev.2009.10.013

971 Zohary, M., 1973. *Geobotanical Foundations of the Middle East*. Gustav Fischer Verlag, Swets &  
972 Zeitlinger, Stuttgart, Amsterdam.

973 Altiner, Y., Söhne, W., Güney, C., Perlt, J., Wang, R., Muzli, M., 2013. A geodetic study of the 23  
974 October 2011 Van, Turkey earthquake. *Tectonophysics* 588, 118–134.  
975 doi:10.1016/j.tecto.2012.12.005

976 Ayalon, A., Bar Matthews, M., Kaufman, A., 2002. Climatic conditions during marine oxygen isotope  
977 stage 6 in the eastern Mediterranean region from the isotopic composition of speleothems of  
978 Soreq Cave, Israel. *Geology* 30, 303–306. doi:10.1130/0091-  
979 7613(2002)030<0303:CCDMOI>2.0.CO;2

980 Bar Matthews, M., Ayalon, A., Gilmour, M., Matthews, A., Hawkesworth, C.J., 2003. Sea–land oxygen  
981 isotopic relationships from planktonic foraminifera and speleothems in the Eastern Mediterranean  
982 region and their implication for paleorainfall during interglacial intervals. *Geochimica et*  
983 *Cosmochimica Acta* 67, 3181–3199. doi:10.1016/S0016-7037(02)01031-1

984 Bard, E., Delaygue, G., Rostek, F., Antonioli, F., Silenzi, S., Schrag, D.P., 2002. Hydrological conditions  
985 over the western Mediterranean basin during the deposition of the cold Sapropel 6 (ca. 175 kyr  
986 BP). *Earth and Planetary Science Letters* 202, 481–494. doi:10.1016/S0012-821X(02)00788-4

987 Barker, S., Knorr, G., Edwards, R.L., Parrenin, F., Putnam, A.E., Skinner, L.C., Wolff, E., Ziegler, M.,  
988 2011. 800,000 Years of Abrupt Climate Variability. *Science* 334, 347–351.  
989 doi:10.1126/science.1203580

990 Bennett, K.D., Tzedakis, P.C., Willis, K.J., 1991. Quaternary refugia of north European trees. *Journal of*  
991 *Biogeography* 103, 115. doi:10.2307/2845248

992 Berger, A., 1978. Long-term variations of daily insolation and Quaternary climate changes. *Journal of*  
993 *Atmospheric Sciences* 35, 2362–2367. doi:10.1175/1520-  
994 0469(1978)035<2362:LTVOI>2.0.CO;2

995 Berger, A., Loutre, M.F., Kaspar, F., Lorenz, S.J., 2007. Insolation During Interglacial, in: Sirocko, F.,  
996 Claussen, M., Sánchez Goñi, M.F., Litt, T. (Eds.), *The Climate of Past Interglacial*. Elsevier,  
997 Amsterdam, pp. 13–27.

998 Berglund, B.E., Ralska-Jasiewiczowa, M., 1986. Pollen analysis and pollen diagrams, in: Berglund, B.E.,  
999 Ralska-Jasiewiczowa, M. (Eds.), *Handbook of Holocene Palaeoecology and Palaeohydrology*.  
1000 John Wiley and Sons, pp. 455–484.

1001 Beug, H. J., 2004. *Leitfaden der Pollenbestimmung für Mitteleuropa und angrenzende Gebiete*. Pfeil,  
1002 München.

1003 Cacho, I., Grimalt, J.O., Pelejero, C., Canals, M., Sierro, F.J., Flores, J.A., Shackleton, N., 1999:  
1004 Dansgaard-Oeschger and Heinrich event imprints in Alboran Sea paleotemperatures.  
1005 *Paleoceanography* 14, 698–705. doi:10.1029/1999PA900044

1006 Cacho, I., Grimalt, J.O., Sierro, F.J., Shackleton, N.J. s., Canals, M., 2000. Evidence for enhanced  
1007 Mediterranean thermohaline circulation during rapid climatic coolings. *Earth and Planetary*  
1008 *Science Letters* 183, 417–429. doi:10.1016/S0012-821X(00)00296-X

1009 Chapman, M.R., Shackleton, N.J., 1999. Global ice-volume fluctuations, North Atlantic ice-rafting events,  
1010 and deep-ocean circulation changes between 130 and 70 ka. *Geology* 27, 795–798.  
1011 doi:10.1130/0091-7613(1999)027<0795:GIVENA>2.3.CO;2

1012 Dale, B., 2001. The sedimentary record of dinoflagellate cysts: looking back into the future of  
1013 phytoplankton blooms. *Scientia Marina* 65, 257–272. doi:10.3989/scimar.2001.65s2257

1014 Denton, G.H., Anderson, R.F., Toggweiler, J.R., Edwards, R.L., Schaefer, J.M., Putnam, A.E., 2010. The  
1015 Last Glacial Termination. *Science* 328, 1652. doi:10.1126/science.1184119

1016 Faegri, K., Iversen, J., 1989. *Textbook of Pollen Analysis*. The Blackburn Press.

1017 Follieri, M., Magri, D., Sadori, L., 1988. 250,000-year pollen record from Valle di Castiglione-Roma.  
1018 *Pollen et Spores* 30, 329–356.

- Frey, W., Kürschner, H., 1989. Die Vegetation im Vorderer Orient. Erläuterungen zur Karte A VI 1 Vorderer Orient. Vegetation des "Tübinger Atlas des Vorderen Orients", Reihe A. Tübinger Atlas des Vorderen Orients, Wiesbaden.
- Frogley, M.R., Tzedakis, P.C., Heaton, T.H.E., 1999. Climate Variability in Northwest Greece During the Last Interglacial. *Science* 285, 1886–1889. doi:10.1126/science.285.5435.1886
- Gasse, F., Vidal, L., Develle, A. L., Van Campo, E., 2011. Hydrological variability in the Northern Levant: a 250-ka multiproxy record from the Yammou'ineh (Lebanon) sedimentary sequence. *Climate of the Past* 7, 1261–1284. doi:10.5194/cp-7-1261-2011
- Gasse, F., Vidal, L., Van Campo, E., Demory, F., Develle, A. L., Tachikawa, K., Elias, A., Bard, E., Garcia, M., Sonzogni, C., Thouveny, N., 2015. Hydroclimatic changes in northern Levant over the past 400,000 years. *Quaternary Science Reviews* 111, 1–8. doi:10.1016/j.quascirev.2014.12.019
- Giorgi, F., Lionello, P., 2008. Climate change projections for the Mediterranean region. *Global and Planetary Change* 63, 90–104. doi:10.1016/j.gloplacha.2007.09.005
- Jessen, A., Milthers, V., 1928. Stratigraphical and paleontological studies of interglacial freshwater deposits in Jutland and Northwest Germany. *Danmarks Geologiske Undersøgelse* 48, 1–379.
- Jouzel, J., Masson Delmotte, V., Cattani, O., Dreyfus, G., Falourd, S., Hoffmann, G., Minster, B., Nouet, J., Barnola, J.M., Chappellaz, J., Fischer, H., Gallet, J.C., Johnsen, S., Leuenberger, M., Loulergue, L., Luethi, D., Oerter, H., Parrenin, F., Raisbeck, G., Raynaud, D., Schilt, A., Schwander, J., Selmo, E., Souchez, R., Spahni, R., Stauffer, B., Steffensen, J.P., Stenni, B., Stocker, T.F., Tison, J.L., Werner, M., Wolff, E.W., 2007. Orbital and Millennial Antarctic Climate Variability over the Past 800,000 Years. *Science* 317, 793–796. doi:10.1126/science.1141038
- Kallel, N., Duplessy, J. C., Labeyrie, L., Fontugne, M., Paterne, M., Montacer, M., 2000. Mediterranean pluvial periods and sapropel formation over the last 200 000 years. *Palaeogeography, Palaeoclimatology, Palaeoecology* 157, 45–58. doi:10.1016/S0031-0182(99)00149-2
- Kwiecien, O., Stockhecke, M., Pickarski, N., Heumann, G., Litt, T., Sturm, M., Anselmetti, F., Kipfer, R., Haug, G.H., 2014. Dynamics of the last four glacial terminations recorded in Lake Van, Turkey. *Quaternary Science Reviews* 104, 42–52. doi:10.1016/j.quascirev.2014.07.001
- Lang, N., Wolff, E.W., 2011. Interglacial and glacial variability from the last 800 ka in marine, ice and terrestrial archives. *Climate of the Past* 7, 361–380. doi:10.5194/cp-7-361-2011
- Lemeke, G., Sturm, M., 1997.  $\delta$  18O and trace element measurements as proxy for the reconstruction of climate changes at Lake Van (Turkey): preliminary results., in: Dalfes, H.N., Kulka, G., Weiss, H. (Eds.), *Third Millennium BC Climate Change and Old World Collapse*. NATO ASI Series, pp. 653–679.
- Leng, M.J., Marshall, J.D., 2004. Palaeoclimate interpretation of stable isotope data from lake sediment archives. *Quaternary Science Reviews* 23, 811–831. doi:10.1016/j.quascirev.2003.06.012
- Lisiecki, L.E., Raymo, M.E., 2004. A Plio-Pleistocene Stack of 57 Globally Distributed Benthic  $\delta$  18O Records. *Paleoceanography* 20, 1–16.
- Litt, T., Anselmetti, F.S., 2014. Lake Van deep drilling project PALEOVAN. *Quaternary Science Reviews* 104, 1–7. doi:10.1016/j.quascirev.2014.09.026
- Litt, T., Anselmetti, F.S., Baumgarten, H., Beer, J., Çagatay, N., Cukur, D., Damci, E., Glombitza, C., Haug, G., Heumann, G., Kallmeyer, J., Kipfer, R., Krastel, S., Kwiecien, O., Meydan, A.F., Öreen, S., Pickarski, N., Randlett, M. E., Schmincke, H. U., Schubert, C.J., Sturm, M., Sumita, M., Stockhecke, M., Tomonaga, Y., Vigliotti, L., Wonik, T., team, the P. scientific, 2012. 500,000 Years of Environmental History in Eastern Anatolia: The PALEOVAN Drilling Project. *Scientific Drilling Journal* 18–29. doi:10.5194/sd-14-18-2012
- Litt, T., Krastel, S., Sturm, M., Kipfer, R., Öreen, S., Heumann, G., Franz, S.O., Ülgen, U.B., Niessen, F., 2009. "PALEOVAN", International Continental Scientific Drilling Program (ICDP): site survey results and perspectives. *Quaternary Science Reviews* 28, 1555–1567. doi:10.1016/j.quascirev.2009.03.002

- Litt, T., Piekarski, N., Heumann, G., Stockhecke, M., Tzedakis, P.C., 2014. A 600,000-year long continental pollen record from Lake Van, eastern Anatolia (Turkey). *Quaternary Science Reviews* 104, 30–41. doi:10.1016/j.quascirev.2014.03.017
- Margari, V., Skinner, L.C., Tzedakis, P.C., Ganopolski, A., Vautravers, M., Shackleton, N.J., 2010. The nature of millennial-scale climate variability during the past two glacial periods. *Nature Geoscience* 3, 127–131. doi:10.1038/ngeo740
- Martinson, D.G., Pisias, N.G., Hays, J.D., Imbrie, J., Moore Jr., T.C., Shackleton, N.J., 1987. Age dating and the orbital theory of the ice ages: Development of a high-resolution 0 to 300,000-year chronostratigraphy. *Quaternary Research* 27, 1–29. doi:10.1016/0033-5894(87)90046-9
- McManus, J.F., Oppo, D.W., Cullen, J.L., 1999. A 0.5-Million-Year Record of Millennial-Scale Climate Variability in the North Atlantic. *Science* 283, 971–975. doi:10.1126/science.283.5404.971
- Milner, A.M., Müller, U.C., Roucoux, K.H., Collier, R.E.L., Pross, J., Kalaitzidis, S., Christanis, K., Tzedakis, P.C., 2013. Environmental variability during the Last Interglacial: a new high-resolution pollen record from Tenaghi Philippon, Greece. *Journal of Quaternary Science* 28, 113–117. doi:10.1002/jqs.2617
- Moore, P.D., Webb, J.A., Collinson, M.E., 1991. *Pollen Analysis*. Blackwell Science.
- NGRIP, 2004. High-resolution record of Northern Hemisphere climate extending into the last interglacial period. *Nature* 431, 147–151. doi:10.1038/nature02805
- Petit, J.R., Jouzel, J., Raynaud, D., Barkov, N.I., Barnola, J.-M., Basile, I., Bender, M., Chappellaz, J., Davis, M., Delaygue, G., Delmotte, M., Kotlyakov, V.M., Legrand, M., Lipenkov, V.Y., Lorius, C., Pepin, L., Ritz, C., Saltzman, E., Stievenard, M., 1999. Climate and atmospheric history of the past 420,000 years from the Vostok ice core, Antarctica. *Nature* 399, 429–436. doi:10.1038/20859
- Piekarski, N., Kwiecien, O., Djamali, M., Litt, T., 2015a. Vegetation and environmental changes during the last interglacial in eastern Anatolia (Turkey): a new high-resolution pollen record from Lake Van. *Palaeogeography, Palaeoclimatology, Palaeoecology* 145–158. doi:10.1016/j.palaeo.2015.06.015
- Piekarski, N., Kwiecien, O., Langgut, D., Litt, T., 2015b. Abrupt climate and vegetation variability of eastern Anatolia during the last glacial. *Climate of the Past* 11, 1491–1505. doi:10.5194/cp-11-1491-2015
- Punt, W., 1976. *The Northwest European Pollen Flora*. Elsevier, Amsterdam.
- Rasmussen, S.O., Bigler, M., Blockley, S.P., Blunier, T., Buchardt, S.L., Clausen, H.B., Cvijanovic, I., Dahl-Jensen, D., Johnsen, S.J., Fischer, H., Gkinis, V., Guillevic, M., Hoek, W.Z., Lowe, J.J., Pedro, J.B., Popp, T., Scierstad, I.K., Steffensen, J.P., Svensson, A.M., Vallelonga, P., Vinther, B.M., Walker, M.J.C., Wheatley, J.J., Winstrup, M., 2014. A stratigraphic framework for abrupt climatic changes during the Last Glacial period based on three synchronized Greenland ice-core records: refining and extending the INTIMATE event stratigraphy. *Quaternary Science Reviews* 106, 14–28. doi:10.1016/j.quascirev.2014.09.007
- Reilinger, R., McClusky, S., Vernant, P., Lawrence, S., Ergintav, S., Cakmak, R., Ozener, H., Kadirov, F., Guliev, I., Stepanyan, R., Nadariya, M., Hahubia, G., Mahmoud, S., Sakr, K., ArRajehi, A., Paradissis, D., Al-Aydrus, A., Prilepin, M., Guseva, T., Evren, E., Dmitrova, A., Filikov, S.V., Gomez, F., Al-Ghazzi, R., Karam, G., 2006. GPS constraints on continental deformation in the Africa–Arabia–Eurasia continental collision zone and implications for the dynamics of plate interactions. *Journal of Geophysical Research* 111, 1–26. doi:10.1029/2005JB004051
- Reille, M., 1999. *Pollen et spores d'Europe et d'Afrique du Nord*. Laboratoire de Botanique Historique et Palynologie, Marseille.
- Reille, M., 1998. *Pollen et spores d'Europe et d'Afrique du Nord (Supplément 2)*. Laboratoire de Botanique Historique et Palynologie, Marseille.
- Reille, M., 1995. *Pollen et spores d'Europe et d'Afrique du Nord (Supplément 1)*. Laboratoire de Botanique Historique et Palynologie, Marseille.
- Reille, M., de Beaulieu, J., Svobodova, H., Andrieu-Ponel, V., Goeury, C., 2000. Pollen analytical biostratigraphy of the last five climatic cycles from a long continental sequence from the Velay region (Massif Central, France). *Journal of Quaternary Science* 15, 665–685.

- Roberts, N., Jones, M.D., Benkaddour, A., Eastwood, W.J., Filippi, M.L., Frogley, M.R., Lamb, H.F., Leng, M.J., Reed, J.M., Stein, M., Stevens, L., Valero Garcés, B., Zanchetta, G., 2008. Stable isotope records of Late Quaternary climate and hydrology from Mediterranean lakes: the ISOMED synthesis. *Quaternary Science Reviews* 27, 2426–2441. doi:10.1016/j.quascirev.2008.09.005
- Roucoux, K.H., Tzedakis, P.C., Frogley, M.R., Lawson, I.T., Preece, R.C., 2008. Vegetation history of the marine isotope stage 7 interglacial complex at Ioannina, NW Greece. *Quaternary Science Reviews* 27, 1378–1395. doi:10.1016/j.quascirev.2008.04.002
- Roucoux, K.H., Tzedakis, P.C., Lawson, I.T., Margari, V., 2011. Vegetation history of the penultimate glacial period (Marine isotope stage 6) at Ioannina, north-west Greece. *Journal of Quaternary Science* 26, 616–626. doi:10.1002/jqs.1483
- Sadori, L., Koutsodendris, A., Panagiotopoulos, K., Masi, A., Bertini, A., Combourieu-Nebout, N., Francke, A., Kouli, K., Joannin, S., Mercuri, A.M., Peyron, O., Torri, P., Wagner, B., Zanchetta, G., Sinopoli, G., Donders, T.H., 2016. Pollen-based paleoenvironmental and paleoclimatic change at Lake Ohrid (south-eastern Europe) during the past 500 ka. *Biogeosciences* 13, 1423–1437. doi:10.5194/bg-13-1423-2016
- Sánchez Goñi, M.F., Eynaud, F., Turon, J.L., Shackleton, N.J., 1999. High resolution palynological record off the Iberian margin: direct land-sea correlation for the Last Interglacial complex. *Earth and Planetary Science Letters* 171, 123–137. doi:10.1016/S0012-821X(99)00141-7
- Shackleton, N.J., Hall, M.A., Vincent, E., 2000. Phase relationships between millennial-scale events 64,000–24,000 years ago. *Paleoceanography* 15, 565–569. doi:10.1029/2000PA000513
- Shackleton, N.J., Sánchez Goñi, M.F., Pailler, D., Lancelot, Y., 2003. Marine Isotope Substage 5e and the Eemian Interglacial. *THE EEMIAN INTERGLACIAL: A GLOBAL PERSPECTIVE* 36, 151–155. doi:10.1016/S0921-8181(02)00181-9
- Shumilovskikh, L.S., Tarasov, P., Arz, H.W., Fleitmann, D., Marret, F., Nowaczyk, N., Plessen, B., Schlütz, F., Behling, H., 2012. Vegetation and environmental dynamics in the southern Black Sea region since 18 kyr BP derived from the marine core 22-GC3. *Palaeogeography, Palaeoclimatology, Palaeoecology* 337–338, 177–193. doi:10.1016/j.palaeo.2012.04.015
- Stoekheke, M., Kwiecien, O., Vigliotti, L., Anselmetti, F.S., Beer, J., Çagatay, M.N., Channell, J.E.T., Kipfer, R., Lachner, J., Litt, T., Pickarski, N., Sturm, M., 2014a. Chronostratigraphy of the 600,000-year-old continental record of Lake Van (Turkey). *Quaternary Science Reviews* 104, 8–17. doi:10.1016/j.quascirev.2014.04.008
- Stoekheke, M., Sturm, M., Brunner, I., Schmincke, H.-U., Sumita, M., Kipfer, R., Cukur, D., Kwiecien, O., Anselmetti, F.S., 2014b. Sedimentary evolution and environmental history of Lake Van (Turkey) over the past 600,000 years. *Sedimentology* 61, 1830–1861. doi:10.1111/sed.12118
- Stockmarr, J., 1971. Tablets with spores used in absolute pollen analysis. *Pollen et Spores* 13, 615–621.
- Thouveny, N., Caraculles, J., Moreno, E., Leduc, G., Nérini, D., 2004. Geomagnetic moment variation and paleomagnetic excursions since 400 kyr BP: a stacked record from sedimentary sequences of the Portuguese margin. *Earth and Planetary Science Letters* 219, 377–396. doi:10.1016/S0012-821X(03)00701-5
- Tzedakis, P.C., 2005. Towards an understanding of the response of southern European vegetation to orbital and suborbital climate variability. *Quaternary Science Reviews* 24, 1585–1599. doi:10.1016/j.quascirev.2004.11.012
- Tzedakis, P.C., 1994. Hierarchical biostratigraphical classification of long pollen sequences. *Journal of Quaternary Science* 9, 257–259. doi:10.1002/jqs.3390090306
- Tzedakis, P.C., Andrieu, V., de Beaulieu, J.-L., Birks, H.J.B., Crowhurst, S., Follieri, M., Hooghiemstra, H., Magri, D., Reille, M., Sadori, L., Shackleton, N.J., Wijmstra, T.A., 2001. Establishing a terrestrial chronological framework as a basis for biostratigraphical comparisons. *European Quaternary Biostratigraphy* 20, 1583–1592.
- Tzedakis, P.C., Andrieu, V., de Beaulieu, J.-L., Crowhurst, S., Follieri, M., Hooghiemstra, H., Magri, D., Reille, M., Sadori, L., Shackleton, N.J., Wijmstra, T.A., 1997. Comparison of terrestrial and

marine records of changing climate of the last 500,000 years. *Earth and Planetary Science Letters* 150, 171–176.

Tzedakis, P.C., Frogley, M.R., Heaton, T.H.E., 2003a. Last Interglacial conditions in southern Europe: evidence from Ioannina, northwest Greece. *Global and Planetary Change* 36, 157–170. doi:10.1016/S0921-8181(02)00182-0

Tzedakis, P.C., Hooghiemstra, H., Palike, H., 2006. The last 1.35 million years at Tenaghi Philippon: revised chronostratigraphy and long-term vegetation trends. *Critical Quaternary Stratigraphy* 25, 3416–3430. doi:10.1016/j.quascirev.2006.09.002

Tzedakis, P.C., Lawson, I.T., Frogley, M.R., Hewitt, G.M., Preece, R.C., 2002. Buffered Tree Population Changes in a Quaternary Refugium: Evolutionary Implications. *Science* 297, 2044–2047. doi:10.1126/science.1073083

Tzedakis, P.C., McManus, J.F., Hooghiemstra, H., Oppo, D.W., Wijnstra, T.A., 2003b. Comparison of changes in vegetation in northeast Greece with records of climate variability on orbital and suborbital frequencies over the last 450,000 years. *Earth and Planetary Science Letters* 212, 197–212. doi:10.1016/S0012-821X(03)00233-4

Van Zeist, W., Bottema, S., 1991. Late Quaternary vegetation of the Near East. *Beihefte zum Tübinger Atlas des Vorderen Orients* 18, 11–156.

Vigliotti, L., Channell, J.E.T., Stockhecke, M., 2014. Paleomagnetism of Lake Van sediments: chronology and paleoenvironment since 350 ka. *Quaternary Science Reviews* 104, 18–29. doi:10.1016/j.quascirev.2014.09.028

Walker, M., Johnsen, S., Rasmussen, S.O., Popp, T., Steffensen, J.P., Gibbard, P., Hoek, W., Lowe, J., Andrews, J., Björck, S., Cwynar, L.C., Hughen, K., Kershaw, P., Kromer, B., Litt, T., Lowe, D.J., Nakagawa, T., Newnham, R., Schwander, J., 2009. Formal definition and dating of the GSSP (Global Stratotype Section and Point) for the base of the Holocene using the Greenland NGRIP ice core, and selected auxiliary records. *J. Quaternary Sci.* 24, 3–17.

Wick, L., Lemeke, G., Sturm, M., 2003. Evidence of Lateglacial and Holocene climatic change and human impact in eastern Anatolia: high resolution pollen, charcoal, isotopic and geochemical records from the laminated sediments of Lake Van. *The Holocene* 13, 665–675. doi:10.1191/0959683603hl653rp

Wolff, E.W., Chappellaz, J., Blunier, T., Rasmussen, S.O., Svensson, A., 2010. Millennial-scale variability during the last glacial: The ice core record. *Quaternary Science Reviews* 29, 2828–2838. doi:10.1016/j.quascirev.2009.10.013

Zohary, M., 1973. *Geobotanical Foundations of the Middle East*. Gustav Fischer Verlag, Swets & Zeitlinger, Stuttgart, Amsterdam.

**Formatiert:** Einzug: Links: 0 cm, Hängend: 1,27 cm, Abstand Nach: 0 Pt., Zeilenabstand: einfach

**Formatiert:** Schriftart: (Standard) + Überschriften (Times New Roman), Deutsch (Deutschland)

1206 **Figures**

1207 **Fig. 1:** Map of the eastern Mediterranean region showing major tectonic structures in Turkey. (a) Location

1208 of key Mediterranean and Near East pollen sites (stars) and speleothem records (triangle) mentioned in the

1209 text. (b) Bathymetry of Lake Van including the Ahlat Ridge drill site (AR, star). The black triangle

1210 indicates the positions of the active Nemrut and Süphan volcanoes. NAFZ: North Anatolian Fault Zone;

1211 EAFZ: East Anatolian Fault Zone; BS: Bitlis Suture.

- Formatiert:** Schriftart: (Standard) +Überschriften (Times New Roman)
- Formatiert:** Deutsch (Deutschland)
- Formatiert:** Schriftart: (Standard) +Überschriften (Times New Roman)
- Formatiert:** Schriftart: (Standard) +Überschriften (Times New Roman), Englisch (Vereinigte Staaten)
- Formatiert:** Schriftart: (Standard) +Überschriften (Times New Roman)
- Formatiert:** Schriftart: (Standard) +Überschriften (Times New Roman)



1212 **Fig. 2:** Pollen diagram of Lake Van sediments plotted against composite depth (mcbf) and  
 1213 age (ka BP). (a) Selected arboreal pollen abundances are expressed as percentages and  
 1214 concentrations of the pollen sum (black curves) key taxa, which excludes bryophytes, pteridophytes, and  
 1215 aquatic taxa. Rare taxa are summed and presented as 'Other AP'. Selected arboreal pollen concentration  
 1216 (grains per cm<sup>3</sup>; red bars) is also given, plotted against composite depth (mcbf) and age (ka BP). (a)  
 1217 Summary curve of percentages total trees and herbs pollen, selected arboreal pollen percentages and  
 1218 pollen concentrations (red bars), spores of green algae (*Pseudopediatrum boryanum*, *P.*  
 1219 *kawraiskyi*, coenobia per cm<sup>3</sup>; black bars), dinoflagellates (cysts per cm<sup>3</sup>; black bars), and charcoal  
 1220 particles (>20 µm, particles per cm<sup>3</sup>; black bars) are presented. (b) Selected pollen percentages diagram  
 1221 for non-arboreal taxa and key aquatic herbs (grey curves). Percentages and concentrations are calculated  
 1222 as for arboreal pollen. Rare taxa are summed as 'Other NAP'. Total pollen concentration, selected non-  
 1223 arboreal percentages and concentrations, and key aquatic herbs.  
 1224 The diagram is separated by six pollen assemblages superzones (PAS) and zones (PAZ, grey dashed  
 1225 lines) are indicated on the right and described in Table 2, marked by major horizontal black solid lines,  
 1226 and 13 pollen assemblages zones (PAZ; grey dashed lines). Intervals characterized by oak steppe-forest  
 1227 (AP >30-%) are indicated marked in on the right (grey box) of each diagram (grey box). An exaggeration  
 1228 of the pollen curves (x10; white curves) is used to show low variations in pollen percentages.

**Formatiert:** Schriftart: (Standard) +Überschriften (Times New Roman)

1230 **Fig. 3:** Comparative study of Lake Van paleoenvironmental proxies during the penultimate interglacial-  
1231 glacial cycle. (a) LR04 isotopic record (in ‰ VPDB) with Marine Isotope Stage (MIS) boundaries (grey  
1232 bars) following Lisiecki and Raymo (2004); (b) Insolation values (40°N, Wm<sup>-2</sup>) after Berger (1978) and  
1233 Berger et al. (2007); (bc) Lake Van oxygen isotope records  $\delta^{18}\text{O}_{\text{bulk}}$  (‰ VPDB; new analyzed isotope data  
1234 including the already published isotope record by Kwiecien et al., 2014); (ed) Calcium/potassium ratio  
1235 (Ca/K) after Kwiecien et al. (2014); (de) Fire intensity at Lake Van (>20  $\mu\text{m}$ , charcoal concentration in  
1236 particles cm<sup>-3</sup>); (ef) Selected tree percentages (total arboreal pollen (AP), deciduous *Quercus*, and *Pinus*)  
1237 including the pollen data from Litt et al. (2014); ~~MIS – Marine Isotope Stage; PAZ – Pollen assemblage~~  
1238 zone. ~~Termination III (T III) at 241.4 ka BP is indicated. Termination III at 250 ka, THIA at 223 ka and TII~~  
1239 ~~at 136 ka are indicated after Barker et al. (2011) and Stockhecke et al. (2014a).~~

**Formatiert:** Schriftart: (Standard) +Überschriften (Times New Roman)

1241 **Fig. 4:** Comparison of (a) current interglacial (MIS 1; [Litt et al., 2009](#)) with (b) last interglacial (MIS 5e;  
1242 [Pickarski et al., 2015a](#)), and (c) penultimate interglacial complex (MIS 7; this study) at Lake Van. Shown  
1243 is the insolation values (40°N,  $\text{Wm}^{-2}$ ) after [Berger \(1978\)](#) and [Berger et al. \(2007\)](#), the Lake Van arboreal  
1244 pollen (AP) concentration (grains  $\text{cm}^{-3}$ , brown line), and the Lake Van paleovegetation (AP, deciduous  
1245 *Quercus*, and *Pinus* in %). The grey boxes mark each steppe-forest intervals. Marine Isotope Stage (MIS;  
1246 [Lisiecki and Raymo, 2004](#)) and the length of each full-interglacial (MIS 5e, [7a](#), [7c](#), and [7e](#), black arrows)  
1247 are indicated.

**Formatiert:** Schriftart: (Standard) +Überschriften (Times New Roman)

1249 **Fig. 5: Correlation scheme**Comparison of Lake Van pollen record-archive with terrestrial, marine and ice  
 1250 core paleoclimatic sequences on their own timescales. (a) Total arboreal pollen (AP %) and deciduous  
 1251 *Quercus* curve from Lake Van (this study); (b) Arboreal pollen percentages from Yammouneh basin  
 1252 (Lebanon; Gasse et al., 2015); (c) Tree percentages AP, including (green) and excluding (light green) *Pinus*  
 1253 and *Juniperus* (PJ) percentages of the Tenaghi Philippon record (NE Greece; Tzedakis et al., 2003b); (d)  
 1254 AP sequence from Ioannina basin including (orange) and excluding (light orange) *Pinus*, *Juniperus*, and  
 1255 *Betula* (PJB) (NW Greece; Roucoux et al., 2011, 2008); (e) Lake Ohrid pollen record (AP %; Macedonia,  
 1256 Albania; Sadori et al., 2016); (f) Stable oxygen isotope record of Lake Van ( $\delta^{18}\text{O}_{\text{bulk}}$  data including the  
 1257 already published isotope record of Kwiecien et al., 2014); (g) Peqi'in and Soreq Cave speleothem records  
 1258 (Israel; M. Bar-Matthews & A. Ayalon, unpubl. data); (h) Synthetic Greenland ice-core record (GLT-syn;  
 1259 Barker et al., 2011); (i) Atmospheric CO<sub>2</sub> concentration from Vostok ice core, Antarctica (Petit et al.,  
 1260 1999); (j) Mid-June and Mid-January insolation for 40°N (Berger, 1978; Berger et al., 2007). Marine  
 1261 Isotope Stages is also shown (MIS; Martinson et al., 1987). Bands highlights periods of distinctive climate  
 1262 signature discussed in the text. Black dots mark significant interstadial periods. Marine Isotope Stages is  
 1263 also shown (MIS; Lisiecki and Raymo, 2004). Termination III at 250 ka, TIIIA at 223 ka and TII at 136 ka  
 1264 after Barker et al. (2011) and Stockhecke et al. (2014a). Terminations (T III and T II) are indicated.

**Formatiert:** Schriftart: (Standard) + Überschriften (Times New Roman)

1266

1267

1268

1269

1270

1271

1272

1273

1274

1275

1276

**Fig. 6:** Comparison of the (a) last glacial period (MIS 4-2; Pickarski et al., 2015b) with the (b) penultimate glacial (this study) characteristics at Lake Van. Shown is the insolation values (40°N, Wm<sup>-2</sup>) after Berger (1978) and Berger et al. (2007), the  $\delta^{18}\text{O}$  profile from NGRIP ice core (Greenland; NGRIP members, 2004) labeled with Dansgaard-Oeschger (DO) events 1 to 19 for the last glacial period, the  $\delta^{18}\text{O}$  composition of benthic foraminifera of the marine core MD01-2444 (Portuguese margin; Margari et al., 2010) for the penultimate glacial, and the Lake Van paleovegetation with AP % (shown in black), AP in 10-fold exaggeration (grey line), Poaceae, deciduous *Quercus*, and *Pinus*. The grey boxes mark the correlation-comparison between the different paleoenvironmental records of pronounced interstadial oscillations. Marine Isotope Stage (MIS; Lisiecki and Raymo, 2004) and informally numbered interstadials of the MD01-2444 record are indicated (Margari et al., 2010).

**Formatiert:** Schriftart: (Standard) +Überschriften (Times New Roman)



**Tables:**

**Table 1:** Present-day climate data at Lake Van (see Fig. 1 for the location). Data were provided by the Turkish State Meteorological Service (observation period: 1975-2008, (see Fig. 1 for the location; Climate data.org; 1982-2012).

| Station | Coordinates   |                |                  | Mean temperature (°C) |       |      | Mean precipitation (mm) |      |      |
|---------|---------------|----------------|------------------|-----------------------|-------|------|-------------------------|------|------|
|         | Latitude (°N) | Longitude (°E) | Altitude (m asl) | Jan.                  | July  | Year | Jan.                    | July | Year |
| Bitlis  | 38°24'        | 42°60'06"      | 1536             | -2.80                 | 22.50 | 9.74 | 131                     | 5    | 1059 |
| Tatvan  | 38°30'        | 42°17'         | 1654             | 2.53                  | 21.39 | 9.08 | 899                     | 67   | 844  |
| Erciş   | 39°20'        | 43°22'         | 1694             | 6.04                  | 21.8  | 8.57 | 383                     | 87   | 499  |
| Van     | 38°27'        | 43°19'         | 1689             | 3.74                  | 21.2  | 8.90 | 375                     | 54   | 409  |

**Table 2:** Main palynological characteristics of the Lake Van pollen assemblage superzones (PAS) and zones (PAZ) with composite depth (mcbf), age (ka BP), criteria for lower boundary, components of the pollen assemblage (AP: arboreal pollen, NAP: non-arboreal pollen), green algae concentration (GA: low <1,000; high >1,000 coenobia cm<sup>-3</sup>), dinoflagellates concentrations (DC: low <100; high >100 cysts cm<sup>-3</sup>), charcoal concentrations (CC: low <2,000; moderate 2,000-4,000; high >4,000 particles cm<sup>-3</sup>) and their inferred dominated vegetation type during the penultimate interglacial-glacial cycle. Marine Isotope Stages (MIS) after Lisiecki and Raymo (2004) Martinson et al. (1987) were shown on the right.

Formatiert: Block

Formatiert: Schriftart: (Standard) +Überschriften (Times New Roman), Englisch (Vereinigte Staaten)

Formatiert: Schriftart: (Standard) +Überschriften (Times New Roman), Englisch (Vereinigte Staaten)

Formatiert: Schriftart: (Standard) +Überschriften (Times New Roman), Englisch (Vereinigte Staaten)

Formatiert: Schriftart: (Standard) +Überschriften (Times New Roman)

Feldfunktion geändert

Formatiert: Schriftart: (Standard) +Überschriften (Times New Roman)
