# Supplementary material for: A new high-resolution pollen sequence at Lake Van, Turkey: Insights into penultimate interglacial-glacial climate change on vegetation history
Source: Copernicus journal article supplement (doi:10.5194/cp-2016-133), 2016-12-19
Supplement: Supplementary file [file cp-2016-133-AC1-supplement.zip]

# **A new high-resolution pollen sequence at Lake Van, Turkey: Insights into penultimate interglacial-glacial climate change on vegetation history**

Pickarski, N.<sup>1</sup>, Litt, T.<sup>1</sup>

<sup>1</sup> *University of Bonn, Steinmann Institute for Geology, Mineralogy, and Paleontology, Bonn, Germany*

*Correspondence to:* Nadine Pickarski (pickarski@uni-bonn.de)

## **Abstract**

A new detailed pollen and oxygen isotope record of the penultimate interglacial-glacial cycle, corresponding to the Marine Isotope Stage (MIS) 7-6 has been generated from the ‘Ahlat Ridge’ (AR) sediment core at Lake Van, Turkey. The presented Lake Van pollen record (c. 250.2-128.8 ka) displays the highest temporal resolution in this region with a mean sampling interval of ~540 years.

Integration of all available proxies shows three temperate intervals of high effective soil moisture availability, evidenced by the predominance of steppe-forested landscapes (oak steppe-forest) similar to the present interglacial vegetation in this sensitive semi-arid region between the Black Sea, Caspian Sea, and Mediterranean Sea.

The wettest/warmest stage as indicated by highest temperate tree percentages can be broadly correlated with MIS 7c, while the amplitude of tree population maximum during the oldest penultimate interglacial (MIS 7e) appears to be reduced due to warm but drier climatic conditions. The detailed comparison between the penultimate interglacial complex (MIS 7) to the last interglacial (Eemian, MIS 5e) and the current interglacial (Holocene, MIS 1) provides a vivid illustration of possible differences of successive climatic cycles. Intervening periods of treeless vegetation can be correlated with MIS 7d and 7a, where open landscape favour local erosion and detrital sedimentation. The predominance of steppe elements (e.g., *Artemisia*, *Chenopodiaceae*) during MIS 7d indicates very dry/cold climatic conditions. In contrast, the occurrence of higher temperate tree percentages (mainly deciduous *Quercus*) throughout MIS 7b points to relatively humid and mild conditions, which is in agreement with other pollen sequences in southern Europe. Despite the general dominance of dry/cold desert-steppe vegetation during the penultimate glacial (broadly equivalent to the MIS 6), this period can be divided into two parts: an early stage (c. 193-157 ka BP) with higher oscillations in tree percentages, and a later stage (c. 157-131 ka BP) with lower tree percentages and subdued oscillations. This subdivision of the penultimate glacial is also seen in other pollen records from southern Europe (e.g., MD01-2444 and I-284; Margari et al., 2010; Roucoux et al., 2011). The occurring vegetation pattern is analogous to the MIS 3 to MIS 2 division during the last glacial in the same sediment sequence. Furthermore, we are able to identify the MIS 6e event (c. 179-159 ka BP) as described in marine pollen records, which reveals clear climate variability due to rapid alternation in the vegetation cover.

In comparison with long European pollen archives, speleothem isotope records from the Near East, and global climate parameters (e.g., insolation, atmospheric CO<sub>2</sub> content), the new high-resolution Lake Van record presents an improved insight into regional vegetation dynamics and climate variability in the eastern Mediterranean region.

## **1. Introduction**

The long continental pollen record of Lake Van (Turkey) contributes significantly to the picture of long-term interglacial-glacial terrestrial vegetation history and climate conditions in the Near East (Litt et al., 2014). Based on millennial-scale time resolution (between c. 1-4 ka), the 600,000 year old pollen record already shows a general pattern of alternating periods of forested and treeless landscapes that clearly responds to the Milankovitch-driven global climatic changes (Berger, 1978; Martinson et al., 1987). In that study, the Lake Van pollen record has demonstrated the potential ecological sensitivity for paleoclimate investigations that bridge the southern European and Near East climate realms. Since then, high-resolution multi-proxy investigations of the Lake Van sedimentary record have allowed the systematic documentation of different climatic phases throughout the last interglacial-glacial cycle (Pickarski et al., 2015a, 2015b).

To date, little attention has been focused on characterizing terrestrial sedimentary archives beyond 130 ka. In particular, the detailed vegetation response to climatic and environmental changes in the Near East during the penultimate interglacial-glacial cycle (Marine Isotope Stage (MIS) 7 to 6) has not been thoroughly investigated.

In this context, we present new high-resolution pollen and oxygen isotope data from the ‘Ahlat Ridge’ composite sequence over the penultimate interglacial-glacial cycle (between c. 242.5-131.2 ka). We have added our recent results to the already existing low-resolution palynological and isotope data from Lake Van published by Litt et al. (2014) and Kwiecien et al. (2014). This enables us to provide new detailed documentation of multiple vegetation and environmental changes in eastern Anatolia by a centennial-to-millennial-scale temporal resolution of ~180 to 780 years. Our record is placed in its regional context by the comparison with several archives from the Mediterranean region, e.g., Lake Ohrid (between Former Yugoslavian Republic of Macedonia and Albania; Sadori et al., 2016), Ioannina basin (NW Greece; Frogley et al., 1999; Roucoux et al., 2008, 2011; Tzedakis et al., 2003a), Tenaghi Philippon (NE Greece; Tzedakis et al., 2003b, 2006), and Yammouneh basin (Lebanon; Gasse et al., 2011, 2015).

In our study, we address the following questions:

- (I) What kind of regional vegetation occurred during the penultimate interglacial complex? Is the regional vegetation pattern of the oldest penultimate interglacial comparable to the last interglacial (Eemian) and current warm stage (Holocene)?

- (II) What processes characterized the climatic and environmental responses during the penultimate glacial? Is this vegetation history similar to the millennial-scale variability recorded during the last glacial in the same sequence?
- (III) Does the Lake Van vegetation history correlate with other existing long pollen records from southern Europe? What are the influencing factors of environmental change in the Near East?

## Site description

Lake Van is situated on the eastern Anatolia high plateau at 1648 m asl (meters above sea level; Fig. 1) in Turkey. The deep terminal alkaline lake (~3574 km<sup>2</sup>, max. depth >450 m) occupies the eastern continuation of the Muş basin developed in the collision zone between the Arabian and Eurasian plates at ~13 Ma (Reilinger et al., 2006). Regional volcanism of Nemrut and Süphan volcanoes (at 2948 m asl and 4058 m asl, respectively; Fig. 1b), subaquatic hydrothermal exhalations and tectonic activities are still active today, evident by the M 7.2 Van earthquake occurred on October 23, 2011 (Altiner et al., 2013).

The present-day climate at Lake Van is continental (summer-dry and winter-wet), with a mean annual temperature of >9°C and mean annual precipitation between 400 and 1200 mm yr<sup>-1</sup> (Turkish State Meteorological Service, 1975-2008; Table 1). In general, eastern Anatolia receives most of its moisture in winter due to Cyprus low-pressure system within the eastern Mediterranean Sea (Giorgi and Lionello, 2008). At Lake Van, rainfall decreases sharply from south-west (c. 1232 mm a<sup>-1</sup> in Bitlis) to north-east (c. 421 mm a<sup>-1</sup> in Erciş; Table 1) due to orographic effects of NWW-SEE running Bitlis Massif parallel to the southern shore of the lake (Fig. 1).

Due to the diverse topography at Lake Van, local variations in moisture availability and temperature are quite pronounced, reflected in the modern vegetation distribution. At present, the vegetation cover around Lake Van has been altered by agricultural and pastoral activities. According to Zohary (1973), the southern mountain slopes are covered by the Kurdo-Zagrosian oak steppe-forest belt, containing *Quercus brantii*, *Q. ithaburensis*, *Q. libani*, *Q. robur*, *Q. petraea*, *Juniperus excelsa*, and *Pistacia atlantica*. This oak steppe-forest has also been described as ‘mixed formation of cold-deciduous broad-leaved montane woodland and xeromorphic dwarf-shrublands’ by Frey and Kürschner (1989). In contrast, dwarf-shrub steppes of the Irano-Turanian floral province is dominated by *Artemisietea fragrantis anatolica* steppe, different species of Chenopodiaceae, and grasses with some sub-Euxinian oak-forest remnants (Frey and Kürschner, 1989; van Zeist and Bottema, 1991; Zohary, 1973).

## 2. Material and methods

### 2.1 Ahlat Ridge composite record

The sediment archive ‘AR’ (Ahlat Ridge; 38.667°N, 42.669°E at c. 357 m water depth; Fig. 1) was collected during the ICDP drilling campaign (International Continental Scientific Drilling Program, [www.icdp-online.org](http://www.icdp-online.org)) ‘PALEOVAN’ in summer 2010 (Litt and Anselmetti, 2014; Litt et al., 2012). The c. 219 mcbf (meter composite below lake floor) record contains a well-preserved partly laminated or banded sediment sequence, intercalated by several volcanic and event layers (e.g., turbidites; Stockhecke et al., 2014b). For further detailed description of the Lake Van lithology, we refer to Stockhecke et al. (2014b). In this paper, we focus on a 60.1 m long sediment section from 117.19 to 57.10 mcbf representing the time span from c. 250.16-128.79 ka. In this section, we combine new pollen and isotope data with the already existing low-resolution pollen record published by Litt et al. (2014) and oxygen isotope data derived from bulk sediments ( $\delta^{18}\text{O}_{\text{bulk}}$ ) analyzed by Kwiecien et al. (2014).

## 2.2 Chronology

The analytical approaches applied for the Lake Van chronology have previously been published in detail in Stockhecke et al. (2014a). All ages are given in thousands of years before present (ka BP), where 0 BP is defined as 1950 AD. Marine Isotope Stage (MIS) boundaries follow Lisiecki and Raymo (2004). Main results of the construction of the age-depth model are briefly summarized here.

For the investigated period, the age-depth model is based on independent proxy records, e.g., calcium and potassium element ratio (Ca/K) measured by high-resolution X-ray fluorescence (XRF; details in Kwiecien et al., 2014), total organic carbon (TOC; details in Stockhecke et al., 2014b), and pollen data (Litt et al., 2014). For the climatostratigraphic alignment of the presented Lake Van sequence, the proxy records were visually synchronized to the speleothem-based synthetic Greenland record ( $\text{GL}_{\text{T-syn}}$  from 116 to 400 ka BP; Barker et al., 2011). The identifications of TOC-rich sediments containing high Ca/K intensities and increased AP (arboreal pollen) values at the onset of interstadials/interglacials were aligned to the interstadials/interglacial onsets of the synthetic Greenland record by using ‘age control points’. Here, the correlation points of the Lake Van sedimentary record have been mainly defined by abiotic proxies (i.e., TOC) caused by a higher time resolution of this data set in comparison to the pollen samples available during that time. Even if we present a high-resolution pollen record in this paper, leads and lags between different biotic and abiotic proxies related to climate events have to be taken into account.

Furthermore, the age-depth model of the presented section (117.2-57.1 mcbf; 250.2-128.8 ka) was improved by adding two paleomagnetic time markers (relative paleointensity minima, RPI), analyzed by Vigliotti et al. (2014), at ~213-210 ka BP (Pringle Fall event; Thouveny et al., 2004) and at ~240-238 ka BP (Mamaku event; Thouveny et al., 2004). In addition, three reliable  $^{40}\text{Ar}/^{39}\text{Ar}$  ages of single crystal dated tephra layer at c.  $161.9 \pm 3.3$  ka BP (V-114 at 71.48 mcbf), c.  $178.0 \pm 4.4$  ka BP (V-137 at 82.29 mcbf), and c. 182 ka BP (V-144 at 87.62 mcbf; Stockhecke et al., 2014b) are used to refine the age-depth model.

## 2.3 Palynological analysis

For the new high-resolution pollen analysis, 193 sub-samples were taken at 20 cm intervals. The temporal resolution between each pollen sample, derived from the present age-depth model, ranges from ~180 to 780 years (mean temporal resolution c. 540 years).

Sub-samples with a volume of 4 cm<sup>3</sup> were prepared using the standard palynological procedures by Faegri and Iversen (1989), improved at the University of Bonn. This preparation includes treatment with 10% hot hydrochloric acid (HCl; 10 min), 10% hot potassium hydroxide (KOH; 25 min), 39% hydrofluoric acid (HF; 2 days), glacial acetic acid (C<sub>2</sub>H<sub>4</sub>O<sub>2</sub>), hot acetolysis with 1 part concentrated sulfuric acid (H<sub>2</sub>SO<sub>4</sub>) and 9 parts concentrated acetic anhydride (C<sub>4</sub>H<sub>6</sub>O<sub>3</sub>; max. 3 min), and ultrasonic sieving to concentrate the palynomorphs. In order to calculate the pollen and micro-charcoal (>20 µm) concentrations (grains cm<sup>-3</sup> and particles cm<sup>-3</sup>, respectively), tablets of *Lycopodium clavatum* spore (Batch no. 483216, Batch no. 177745) were added to each sample (Stockmarr, 1971). In all spectra, the average of ~540 pollen grains was counted in each sample using a Zeiss Axio Lab.A1 light microscope. Terrestrial pollen taxa were identified to the lowest possible taxonomic group, using the recent pollen reference collections of the Steinmann Institute, Department of Paleobotany as well as Beug (2004), Moore et al. (1991), Punt (1976), and Reille (1999, 1998, 1995). Furthermore, we followed the taxonomic nomenclature according to Berglund and Ralska-Jasiewiczowa (1986).

Pollen results are given as a percentage and concentration diagram of selected taxa (Fig. 2). The diagram includes the total arboreal pollen (AP; trees & shrubs) and non-arboreal pollen (NAP; herbs) ratio (100% terrestrial pollen sum). In order to evaluate lake surface conditions, dinoflagellate cysts and green algae (e.g., *Pseudopediastrum boryanum*, *P. kawraiskyi*, *Pediastrum simplex*, *Monactinus simplex*) were counted on the residues from preparation for palynological analyses. Percent calculation, cluster analysis (CONISS, sum of square roots) to define pollen assemblage zones (PAZ), and construction of the pollen diagram were carried out by using TILIA software (version 1.7.16; ©1991–2011 Eric C. Grimm).

The complete palynological dataset is available on the PANGAEA database ([www.pangaea.de](http://www.pangaea.de); <https://doi.org/10.1594/PANGAEA.871228>).

## 2.4 Oxygen isotope analysis

Stable oxygen isotope measurements ( $\delta^{18}\text{O}_{\text{bulk}}$ ) were made on bulk sediment samples with an authigenic carbonate content of ~30% (CaCO<sub>3</sub>). Similar to the pollen analysis, 193 sub-samples were taken for the new high-resolution isotope record at 20 cm interval within the penultimate interglacial-glacial cycle. Before measurements were made, the samples were dried at c. 40°C for a least 48 hours and homogenized by a mortar. The isotope analyses were carried out at the Leibnitz-Laboratory, University of Kiel, using a Finnigan GasBenchII with carbonate option coupled to a DELTAplusXL IRMS.

All isotope values are reported in per mil (‰), relative to the Vienna Pee Dee Belemnite (VPDB) standard. The standard deviation of the analyses of replicate samples is 0.02‰ for  $\delta^{18}\text{O}_{\text{bulk}}$ .

### 3. New data from the Lake Van sequence

#### 3.1. The high-resolution pollen record

The new palynological results from the penultimate interglacial-glacial cycle are illustrated in a simplified pollen diagram (Fig. 2). Main characteristics of each pollen zone and the interpretation of their inferred dominant vegetation types are summarized in Table 2.

The low-resolution pollen sequence, shown in Litt et al. (2014), has already been divided into six pollen assemblage superzones (PAS IIIc, IV, Va, Vb, Vc, VI). This study followed the criteria for the classification of the pollen superzones as described in Tzedakis (1994 and references therein). Based on the new detailed high-resolution pollen sequence compared to the record in Litt et al. (2014), the PAS IV, Va and Vc can now be further subdivided into 13 pollen assemblage zones (PAZ).

The pollen diagram provides a broad view of alternation between regional open deciduous oak steppe-forest and treeless desert-steppe vegetation. We were able to recognize three main phases (PAZ Va1, Va3, and during Vc2 and Vc3), where total arboreal pollen percentages reach above 30%. These phases are predominantly represented by deciduous *Quercus* (max. ~56%), *Pinus* (max. ~26%), *Betula* (max. ~8%), and *Juniperus* (max. ~7%). However, AP maxima do not exceed 60-70%, suggesting that ‘closed’ forest conditions were never established in eastern Anatolia. Mediterranean sclerophylls, e.g., *Pistacia* cf. *atlantica*, are only present sporadically and at very low percentages. During open non-forested periods, the most significant herbaceous taxa are the steppe elements Chenopodiaceae (max. ~76%), *Artemisia* (max. ~56%), and further herbs, such as Poaceae (max. ~54%), Tubuliflorae (max. ~13%), and Liguliflorae (max. ~10%).

Throughout the sequence, the total pollen concentration values vary between c. 1700 and 52,000 grains  $\text{cm}^{-3}$ . During PAZ IV1-6, Va2, Vb, and VI, the pollen concentration is dominated mainly by steppic herbaceous pollen species (between 5000 and 52,000 grains  $\text{cm}^{-3}$ ), whereas PAZ IIIc 6, Va1, Va3, and Vc2-3 consist of tree and shrubs taxa (all above c. 5000 grains  $\text{cm}^{-3}$ ).

In total, six green algae taxa were identified in the Lake Van sediments. Fig. 2a presents only the most important *Pseudopediastrum* species. The density of the thermophilic taxa *Pseudopediastrum boryanum* reached maxima values (c. 5500 coenobia  $\text{cm}^{-3}$ ) combined with high AP percentages especially during PAZ Vc2. In contrast, the cold-tolerant species *Pseudopediastrum kawraiskyi* occurred during treeless phases (PAZ IV4-2; max. values c. 2000 coenobia  $\text{cm}^{-3}$ ).

Furthermore, we calculated dinoflagellate concentration (probably *Spiniferites bentorii*; cysts  $\text{cm}^{-3}$ ) in order to get additional information about environmental conditions of the lake water (Dale, 2001; Shumilovskikh

et al., 2012). The occurrence of *Spiniferites* spp. in lacustrine sediments suggests low aquatic bio-productivity (low nutrient level) and hypersaline conditions (Zonneveld and Pospelova, 2015; Zonneveld et al., 2013). In this study, the concentration of dinoflagellate cysts is high (500-2000 cysts cm<sup>-3</sup>) during non-forested periods, especially within PAZ IV1, IV3, IV5, Va2, and PAS Vb (Fig. 2a).

The microscopic charcoal concentrations range between 300 and ~3000 particles cm<sup>-3</sup> during non-forested phases when terrestrial biomass was relatively low (PAZ IV1-5, Va2, Vb and Vc1; Fig. 2a). During forested phases, the charcoal content reaches maxima values of c. 8000 particles cm<sup>-3</sup> (e.g., in PAZ Va3, Vc4-2).

### 3.2. The oxygen isotopic composition of Lake Van sediments

The general pattern of Lake Van isotope composition of bulk sediments shows very high-frequency oscillation (Fig. 3). The  $\delta^{18}\text{O}_{\text{bulk}}$  ranges from c. 5.9‰ to -4.6‰. Positive values occur between 250 and 244 ka, 238-222 ka, at 215 ka; 213-203 ka, 192-190 ka, 189-182 ka, and mainly between 171-157 ka and 141-134 ka. Negative isotope composition ( $\delta^{18}\text{O}_{\text{bulk}}$  below 0‰) can be observed at ~241 ka; 221-216 ka; 202-194 ka; at ~181 ka, 178-171 ka, and between 156 and 155 ka.

Previous studies at Lake Van (e.g., Kwiecien et al., 2014; Lemcke and Sturm, 1997; Litt et al., 2012, 2009; Wick et al., 2003) have shown that the stable isotope signature of lake carbonates reflects complex interaction between both several regional climatic variables and local site-specific factors. Such climate variables are the moisture source, in this case the eastern Mediterranean Sea surface water and the storm trajectories coming from the Mediterranean Sea, as well as temperature changes. Furthermore, the lake water itself is related to the seasonality of precipitation (both rain and snowfall; water inflow) and evaporation processes in the catchment area. However, the Lake Van authigenic carbonate  $\delta^{18}\text{O}_{\text{bulk}}$  values are primarily controlled by water temperature and isotopic composition of the lake water ( $T+\delta^{18}\text{O}_w$ ; Kwiecien et al., 2014; Leng and Marshall, 2004; Roberts et al., 2008).

At the beginning of terrestrial temperate intervals (e.g., PAZ Vc4, the end of Vb, Va1, and IIIc6), the  $\delta^{18}\text{O}_{\text{bulk}}$  composition of the lake water becomes more depleted (Fig. 3c). According to Kwiecien et al. (2014) and Roberts et al. (2008), negative isotope values at the beginning of temperate intervals document not only enhanced precipitation during winter months but also the significant contribution of depleted snow melt/glacier meltwater during the summer months.

## 4. Discussion

### 4.1 Boundary definition and biostratigraphy

Based on long continental records in southern Europe (compiled by Tzedakis et al., 1997, 2001) and in the eastern Mediterranean area (Litt et al., 2014; Stockhecke et al., 2014a), it was shown that there is a broad correspondence between warm climatic intervals, respectively periods of low ice volume as defined by

Marine Isotope Stages (MIS; Lisiecki and Raymo, 2004) and terrestrial temperate intervals (forested periods). In the continental, semi-arid Lake Van area it is difficult to use only the expansion of trees as criterion for the lower boundary of a warm stage. Therefore, the climatic boundaries at Lake Van were mainly defined by abiotic proxies (i.e., TOC) caused by a higher time resolution (Stockhecke et al., 2014a). However, we are aware that using different proxies do not necessarily occur at the same time (Sánchez Goñi et al., 1999; Shackleton et al., 2003). Even if we present a high-resolution pollen record in this paper, leads and lags between different biotic and abiotic proxies related to climate events have to be taken into account. In addition, glacial/interglacial transitions (Termination) are near-synchronous global and abrupt climate changes. This scenario includes rising of Northern Hemisphere summer insolation, leading to ice-sheet melting and freshwater supply into the Atlantic Ocean (Denton et al., 2010). In this study, we follow the structure of Termination III at 250 ka, TIIIA at 223 ka, and TII at 136 ka after Barker et al. (2011) and Stockhecke et al. (2014a; Fig. 3, 5).

The climatostratigraphical term ‘interglacial’ and ‘interstadial’ were originally defined by Jessen and Milthers (1928) on the basis of paleobotanical criteria that are still generally accepted at present time. Here, an interglacial is understood as a temperate period with a climatic optimum at least as warm as the present-day interglacial (Holocene) climate in the same region. An interstadial is defined as a warm period that was either too short or too cold to reach the climate level of an interglacial in the same region. This definition is also valid for the Lake Van region as shown by Litt et al. (2014). In comparison, stadial stages correspond to cold/dry intervals marked by global and local ice re-advances (Lowe and Walker, 1984).

#### **4.2 The penultimate interglacial complex (MIS 7)**

According to Litt et al. (2014), the three-marked temperate arboreal pollen peaks (PAS Vc, Va3, and Va1) can be described as an interglacial complex. This general pattern of triplicate warm phases interrupted by two terrestrial cold periods (PAS Vb, PAZ Va2) is characteristic both in marine and ice-core records (MIS 7e, 7c, and 7a after Lisiecki and Raymo, 2004), as well as for continental pollen sequences in southern Europe correlated and synchronized by Tzedakis et al. (2001).

##### ***Forested periods***

Within the penultimate interglacial complex, the three pronounced steppe-forested intervals PAS Vc (113.7-109.1 mcbf, 242.5-227.4 ka), PAZ Va3 (104.2-101.3 mcbf, 216.3-207.6 ka) and PAZ Va1 (99.9-97.0 mcbf, 203.1-193.4 ka) can be broadly correlated with the MIS 7e, 7c, and MIS 7a after Lisiecki and Raymo (2004), indicating high moisture availability and/or warmer temperature (Fig. 2a, 3f).

The oldest terrestrial warm phase (242.5-227.4 ka, PAS Vc, MIS 7e) starts with the colonization of open habitats by pioneer trees, such as *Betula*, followed by deciduous *Quercus* and sclerophyllous *Pistacia* cf.



atlantica. The occurrence of the frost-sensitive *Pistacia*, as a characteristic feature at the beginning of interglacials in the eastern Mediterranean region, indicates relatively mild winters, but also firmly points to the presence of summer aridity due to higher temperature and evaporation regime (Litt et al., 2014, 2009; Pickarski et al., 2015a; Wick et al., 2003). Similar to the Holocene, the early interglacial spring/summer dryness might be responsible for the delay between the onset of climatic amelioration and of the establishment of deciduous oak steppe-forest as the potential natural interglacial vegetation in eastern Anatolia. Here, the length of the delay depending on local conditions keeping moisture availability below the tolerance threshold for tree growth in the more ecologically stressed areas. Indeed, a reduction of spring rainfall and extension of summer-dry conditions favoured the rapid development of a grass-dominated landscape (mainly *Artemisia*, Poaceae; Fig. 2b). Furthermore, the fire activity rose at the beginning of each warm phase when global temperature increased and the vegetation communities changed from warm-productive grasslands to more steppe-forested environments. Increased fire frequency is clearly visible by high charcoal concentration up to 3000 particles cm<sup>-3</sup> (Fig. 3e). After Termination III at 243 ka, the vegetation change towards more steppe-forest environments correlates with depleted (negative)  $\delta^{18}\text{O}_{\text{bulk}}$  values, which occur at the beginning of the early temperate stage (c. 242-240 ka; Fig. 3c). As discussed earlier, depleted isotope values reflect intensified freshwater supply into the lake by melting of Bitlis glaciers in summer months favouring high detrital input into the basin (low Ca/K ratio; Fig. 3d) and/or enhanced precipitation during winter months (Kwiecien et al., 2014; Roberts et al., 2008).

The climate optimum of the first warm phase is characterized by significant expansion of temperate summer-green taxa, mainly deciduous *Quercus* (above 20% between c. 240-237 ka), *Pistacia* cf. *atlantica*, *Betula*, and sporadic occurrence of *Ulmus*. The vegetation composition documents a warm-temperate environment with enhanced precipitation during the growing season, which can be supported by depleted isotope values ( $\delta^{18}\text{O}_{\text{bulk}}$  -2.17‰; Fig. 3c). Charcoal maxima (>3000 particles/cm<sup>3</sup>) correlates, coeval with the delayed expansion of steppe-forest, with more fuel for burning. The gradual shift from depleted to enriched isotope values ( $\delta^{18}\text{O}_{\text{bulk}}$  5.15‰) indicates a change towards climate conditions with high evaporation rates and/or decreased moisture availability (Kwiecien et al., 2014; Roberts et al., 2008). Here, positive  $\delta^{18}\text{O}_{\text{bulk}}$  values at Lake Van are attributed to evaporative <sup>18</sup>O-enrichment of the lake water during the dry season. Furthermore, Kwiecien et al. (2014) described the relation between soil erosion processes and vegetation cover in the catchment area. They defined interglacial conditions related to increased precipitation indicated by higher amount of arboreal pollen and lower detrital input. Our new high-resolution pollen record validates their hypothesis with high authigenic carbonate concentration (high Ca/K ratio, low terrestrial input) along with the increased terrestrial vegetation density (high AP percentages above 50%) during the climate optimum (Fig. 3).

The ensuing ecological succession of the first warm stage is documented by a shift from deciduous oak steppe-forest towards the predominance of dry-tolerant and/or cold-adapted conifer taxa (e.g., *Pinus* and

*Juniperus*; c. 237-231 ka). Especially, high percentages of *Pinus* suggest a cooling/drying trend, which occurred during low seasonal contrasts (low summer insolation and high winter insolation; Fig. 3). *Pinus* (probably *Pinus nigra*) as a main arboreal component of the ‘Xero-Euxinian steppe-forest’ recently occurs in more continental western and central Anatolia, and in the rain shadow of the coastal Pontic mountain range (van Zeist and Bottema, 1991; Zohary, 1973). Compared to the present distribution of *Pinus nigra* in Anatolia, the Lake Van region was probably more affected by an extended distribution area of pine during the penultimate interglacial as indicated by higher pollen percentages (Holocene below 5%; PAZ Vc2 up to 26%; PAZ Va3 up to 20%; Fig. 4). Holocene pine pollen was mainly transported over several kilometers via wind into the Lake Van basin. Independent of environmental conditions around the lake, the presence of thermophilic algae (i.e., *Pseudopediastrium boryanum*) displays warm and eutrophic conditions within the lake during the late temperate phase.

The presented regional vegetation composition can be described as an oak steppe-forest and marks one of the longest phases of the penultimate interglacial complex, lasting 15,000 years, with a climate optimum between 240 and 237 ka (Fig. 4c). However, this optimum does not appear of very high intensity as suggested by lower development of temperate plants compared to the following warm phase.

The second terrestrial temperate interval (PAS Vb-PAZ Va3; 106.5 -101.3 mcal; c. 221-207 ka; MIS 7c) starts with a shift from cold/arid desert steppe vegetation (e.g., *Chenopodiaceae*) to less arid grassland vegetation (e.g., *Poaceae*, *Artemisia*; Fig. 2b). This was followed by an expansion of *Betula*, high abundance of deciduous *Quercus*, and continued with increased *Pinus* percentages. In this period, the occurrence of *Pistacia* cf. *atlantica* was not as pronounced as during the PAS Vc (MIS 7e), which can be explained by a lower winter insolation (cooler winters; Fig. 3b). Despite all this, the oxygen isotope signature displays similar depleted values ( $\delta^{18}\text{O}_{\text{bulk}}$  up to -3.8‰; Fig. 3c) at the beginning of the middle warm phase, right after the Termination IIIA at 222 ka (Barker et al., 2011; Stockhecke et al., 2014a). In general, the second warm stage shows the highest amplitude of deciduous *Quercus* (peaked at 212.6 ka BP; Fig. 3f) of the entire sequence, which corresponds to the occurrence of the most floristically diverse and complete forest succession in southern European pollen diagrams at the same time (Follieri et al., 1988; Roucoux et al., 2008; Tzedakis et al., 2003b). In fact, deciduous *Quercus* percentages (c. 56%) reach the level of the last interglacial (MIS 5e) and the Holocene forested intervals, representing the most humid and temperate period during the penultimate interglacial complex at Lake Van (Fig. 4; Litt et al., 2014; Pickarski et al., 2015a).

Preliminary comparison with pollen records of Tenaghi Philippon (Tzedakis et al., 2003b) and Ioannina basin (Roucoux et al., 2008) suggest that the extent and the diversity of vegetation development is clearly controlled by insolation forcing and associated climate regimes (high summer temperature, high winter precipitation). At Lake Van, the interglacial forest expansion is closely associated with the timing of the Mid-June insolation peak (Tzedakis, 2005). In general, Mediterranean sclerophylls and other summer-drought resistant taxa expanding during the period of max. summer insolation, while thermophilous taxa are

329 better suited to the less-seasonal climates of the later part of interglacial. Indeed, the highest expansion of  
330 deciduous *Quercus* occurs, coeval to *Pinus*, during lowest seasonal contrasts (cooler summer and warmer  
331 winters). The different amplitudes in the deciduous tree development might have resulted from higher Mid-  
332 June insolation at the beginning of PAZ Va3 (MIS 7c) relative to PAZ Vc4 (MIS 7e, similar to Holocene  
333 levels), despite lower atmospheric CO<sub>2</sub> content (c. 250 ppm, Fig. 5; Jouzel et al., 2007; Lang and Wolff,  
334 2011; Petit et al., 1999; Tzedakis, 2005), and thus, mirrored significant variability in regional effective  
335 moisture content and/or temperature.

336 After a short-term climatic deterioration between 207 and 203 ka BP, the spread of *Pistacia* cf. *atlantica*,  
337 *Betula*, and the predominance of deciduous *Quercus* characterize the youngest warm phase PAZ Va1 (99.9-  
338 97.0 mcalbf, 203.1-193.4 ka, MIS 7a) within the penultimate interglacial complex. Similar to the previous  
339 warm phases, the deciduous *Quercus* percentages (c. 38%) reach the level of the Holocene forested interval  
340 (deciduous *Quercus* c. 40%; Fig. 4). A possible explanation for high thermophilous oak percentages within  
341 MIS 7a is the persistence of relatively large tree populations through the cold period equivalent to MIS 7b,  
342 which was also established in pollen records from Lac du Bouchet (Reille et al., 2000) and at Ioannina basin  
343 (Roucoux et al., 2008).

344 All three forested stages of the penultimate interglacial complex are clearly recorded in other long terrestrial  
345 pollen sequences from Lebanon and southern Europe: (I) the Yammouneh record (Gasse et al., 2015), (II)  
346 the Tenaghi Philippon sequence (Tzedakis et al., 2003b), (III) Ioannina basin (Roucoux et al., 2008), and  
347 (IV) the Lake Ohrid sequence (Sadori et al., 2016). Fig. 5 shows that the Lake Van pollen record generally  
348 agrees with the vegetation development of the Mediterranean region. However, we have to take into  
349 consideration that most southern European sequences, e.g., the Ioannina basin, are situated near to refugial  
350 areas, in which temperate trees persisted during cold stages (Bennett et al., 1991; Milner et al., 2013;  
351 Roucoux et al., 2008; Tzedakis et al., 2002). In this places, where moisture availability was not limiting, the  
352 woodland expansion occurred near the glacial/interglacial boundary (Tzedakis, 2007). Despite this, high-  
353 resolution pollen records from the eastern Mediterranean region (e.g., Ioannina basin; Roucoux et al., 2008)  
354 suggest that the MIS 7 winter temperature during all of these three warm intervals seem to be lower than  
355 during the Holocene and the last interglacial as indicated by smaller populations of sclerophyllous taxa.  
356 Reduced thermophilous components were also discussed for the Velay region (Reille et al., 2000), where  
357 the warm phases Bouchet 2 and 3 equivalent to MIS 7c and 7a are described as interstadials rather than  
358 interglacials. This observation of a cooler MIS in southern Europe contradicts to the vegetation development  
359 at Lake Van, where all warm intervals reach the level of the last interglacial and the Holocene. At Lake Van,  
360 there seems no reason to define the MIS 7c and MIS 7a as an interstadial, separated from the MIS 7e  
361 interglacial.

### 362 *Non-forested periods*

The two periods between the three forested intervals, the first part of PAZ Vb (227-221 ka, 109.1-106.5 mcbf) and PAS Va2 (208-203 ka, 101.3-99.9 mcbf), are broadly equivalent to MIS 7d and MIS 7a (Lisiecki and Raymo, 2004). At Lake Van, cold periods are generally characterized by: (I) extensive steppe vegetation when tree growth was inhibited either by dry/cold or low atmospheric CO<sub>2</sub> conditions (Litt et al., 2014; Pickarski et al., 2015b), (II) high dinoflagellate concentration (*Spiniferites bentorii*, which tolerates high water salinity conditions and suggest low aquatic bio-productivity; Fig. 2a), and (III) high regional mineral input derived from the basin slopes (low Ca/K ratio; Kwiecien et al., 2014; Fig. 3d).

Due to the strongest development of extensive semi-desert steppe plants (mainly Chenopodiaceae above 75%) and massive reduction of temperate tree (AP c. 5%; Fig. 2), the first cold phase suggests considerable climate deterioration and increased aridity. Furthermore, this period is marked by large ice volume and extremely low global temperatures, documented by low CO<sub>2</sub> concentration (~210 ppm; Fig. 5) that are nearly as low as those of MIS 8 and 6 (McManus et al., 1999; Petit et al., 1999). Between 227 and 221 ka, the oxygen isotope record displays consistently  $\delta^{18}\text{O}_{\text{bulk}}$  values above 0‰ that reflect dry climate condition in the Lake Van catchment area (Fig. 3c). Such dry and/or cold period within the entire penultimate interglacial complex can also be recognized in all pollen sequences from Lebanon and southern Europe (Fig. 5; e.g., Gasse et al., 2015; Roucoux et al., 2008; Tzedakis et al., 2003b). An exception is the Lake Ohrid record, which shows only a minor temperate tree decline (Sadori et al., 2016).

In contrast to conventional cold/dry periods at Lake Van, the second cold phase (PAS Va2) recognizes only a slight and short-term steppe-forest contraction. Although the landscape was more open during the youngest phase, moderate values of *Betula*, deciduous *Quercus* (up to 16%) and conifers (*Pinus*, *Juniperus*) formed steppe vegetation with still patchy pioneer and temperate trees. The significantly larger temperate AP percentages (c. 20%) during the PAZ Va2 relative to the PAZ Vb point to milder climate conditions. In addition, the continuous heavier oxygen isotope signature ( $\delta^{18}\text{O}_{\text{bulk}}$  between 1.0-2.4‰) confirms the assumption of milder conditions with higher evaporation rates and more humid conditions. Based on these results, the Lake Van pollen record mirrored the trend seen in various paleoclimatic archives (Fig. 5). Indeed, several pollen sequences from the Mediterranean area and oxygen isotope records suggest that the North Atlantic and southern European region (e.g., Ioannina basin; Roucoux et al., 2008; Fig. 5d) did not experience severe climatic cooling during MIS 7b (e.g., Bar-Matthews et al., 2003; Barker et al., 2011; McManus et al., 1999; Petit et al., 1999). In addition, the global ice volume remains relatively low during the MIS 7b in comparison with other stadial intervals with similarly low insolation values (e.g., Petit et al., 1999; Shackleton et al., 2000). Vostok ice-core sequence also records a relatively high CO<sub>2</sub> content (c. 230-240 ppm) during MIS 7d supporting a slight decline of temperature compared with MIS 7d (CO<sub>2</sub> content c. 207-215 ppm; Fig. 5; McManus et al., 1999; Petit et al., 1999).

#### ***Comparison of past interglacials at Lake Van***

The direct comparison of the penultimate interglacial complex (MIS 7) with the last interglacial (Eemian, MIS 5e; Pickarski et al., 2015a) and the current interglacial (Holocene, MIS 1; Litt et al., 2009) provides the opportunity to assess how different successive climate cycles can be (Fig. 4).

In general, all interglacial climate optima were characterized by the development of an oak steppe-forest, all of which reached the level of the last interglacial and the Holocene, especially the extent of temperate tree taxa. Such dense vegetation cover reduced physical erosion of the surrounding soils in the lake basin. Furthermore, the dominance of steppe-forested landscapes and productive steppe environment led to enhanced fire activity in the catchment area. In addition to these aspects, the MIS 8/7e, MIS 7d/7c as well as the MIS 6/5e boundary in the continental, semi-arid Lake Van region recognized a delayed expansion of deciduous oak steppe-forest of c. 5000 to 2000 years, comparable to the pollen investigations in the marine sediment cores west of Portugal by Sánchez Goñi et al. (2002, 1999). As already shown in high-resolution pollen studies by Wick et al. (2003), Litt et al. (2009), and Pickarski et al. (2015a), a delay in temperate oak steppe-forest refer to the Pleistocene/Holocene boundary as defined in the Greenland ice core from NorthGRIP stratotype (for the Pleistocene/Holocene boundary; Walker et al., 2009) as well as from the speleothem-based synthetic Greenland record (GL<sub>T-syn</sub>; Barker et al., 2011; Stockhecke et al., 2014) can be recognized. The length of the delay depending on slow migration of deciduous trees from arboreal refugia (probably the Caucasus region) and/or by changes in seasonality of effective precipitation rates (Arranz-Otaegui et al., 2017; Pickarski et al., 2015a). In particular oak species are strongly dependent on spring precipitation (El-Moslimany, 1986). A reduction of spring rainfall and extension of summer-dry conditions favoured the rapid development of a grass-dominated landscape (mainly *Artemisia*, Poaceae; considered as competitors for *Quercus* seedlings) and *Pistacia* shrubs in the very sparsely wooded slopes (Asouti and Kabukcu, 2014; Djamali et al., 2010). Furthermore, high intensity of wildfires of late-summer grasslands, at the beginning of each warm period could be responsible for a delayed re-advance of steppe-forest in eastern Anatolia (Arranz-Otaegui et al., 2017; Pickarski et al., 2015a; Turner et al., 2010; Wick et al., 2003). Despite the common vegetation succession from an early to late temperate stage, the three interglacial periods (MIS 7 complex, MIS 5e, and MIS 1) differ in their vegetation composition. One important difference of the last two interglacial vegetation assemblages is the absence of *Carpinus betulus* during MIS 7e, 7c, and 7a compared to a distinct *Carpinus* phase during MIS 5e (Pickarski et al., 2015a). In general, *Carpinus betulus* usually requires high amounts of annual rainfall (high atmospheric humidity), relatively high annual summer temperature, and is intolerance of late frost (Desprat et al., 2006; Huntley and Birks, 1983). In oak-hornbeam communities, *Carpinus betulus* is replaced as the soils are relatively dry and warm or too wet (Eaton et al., 2016). Compared to the common hornbeam, deciduous *Quercus* species are 'less' sensitive to summer droughts (even below 600 mm/a; Tzedakis, 2007), and therefore, a decrease in soil moisture availability would favor the development of deciduous oaks (Huntley and Birks, 1983). Especially, the deep penetrating roots of *Quercus petraea* allow them to withstand moderate droughts by accessing

deeper water (Eaton et al., 2016). However, a variation in temperature is difficult to assess because deciduous oaks at Lake Van include many species (e.g., *Quercus brantii*, *Q. ithaburensis*, *Q. libani*, *Q. robur*, *Q. petraea*) with different ecological requirements (e.g., San-Miguel-Ayanz et al., 2016). Finally, the absence of *Carpinus betulus*, the overall smaller abundances of temperate trees (e.g., *Ulmus*), and the general low diversity within the temperate tree populations during the climate optimum of the first penultimate interglacial compared to the last interglacial indicates warm but drier climate conditions (similar to the Holocene). An exception is the second warm phase (MIS 7c), which reflects one of the largest oak steppe-forest development (e.g., highest amplitude of deciduous *Quercus*) of the entire Lake Van pollen sequence, and thus, represents the most humid and temperate period within the penultimate interglacial complex (see discussion above).

Another important difference is the duration of each interglacial period. According to Tzedakis (2005), the beginning and duration of terrestrial temperate intervals in the eastern Mediterranean region is closely linked to the amplitude of summer insolation maxima and less influenced by the timing of deglaciation. Based on this assumption, the terrestrial temperate interval of all penultimate interglacial stages (max. 15.1 ka) is ~4600 years shorter as the terrestrial temperate interval of the last interglacial at Lake Van (~ 19.7 ka, Pickarski et al., 2015a; Fig. 4).

#### 4.3 The penultimate glacial (MIS 6)

The following penultimate glacial, PAS IV between 193.4-131.2 ka (58.1-96.8 mcbf), can be correlated with the MIS 6 (Lisiecki and Raymo, 2004; Fig. 2, 3). General lower summer insolation (Berger, 1978; Berger et al., 2007), increased global ice sheet extent (McManus et al., 1999), and decreasing atmospheric CO<sub>2</sub> content (below 230 ppm; Petit et al., 1999; Fig. 5) are responsible for enhanced aridity and cooling in eastern Anatolia. Such observed climate deterioration is suggested by the dominance of semi-desert plants (e.g., *Artemisia*, Chenopodiaceae) and by the decline in temperate trees (mainly deciduous *Quercus* <5%) similar to that of the last glacial at the same site. High erosional activity (low Ca/K ratio) and decreasing paleofire ( $\bar{\emptyset}$  ~1400 particles cm<sup>-3</sup>) result from low vegetation cover with low pollen productivity (Fig. 2, 3). As an additional local factor, the strong deficits in available plant water were possibly stored as ice/glaciers in the Bitlis mountains during the coldest phases.

Between 193 and 157 ka BP, high-frequency vegetation (AP between ~1 and 18%) and environmental oscillations (e.g.,  $\delta^{18}\text{O}_{\text{bulk}}$  values between -4 to 6‰) in the Lake Van proxies demonstrate a reproducible pattern of centennial to millennial-scale alternation between interstadials and stadials, as recorded in the Greenland ice core sequences for the last glacial (Fig. 3; e.g., NGRIP, 2004; Rasmussen et al., 2014). Such changes indicate unstable environmental conditions with rapid alternation of slightly warmer/wetter interstadials and cooler/drier stadials at Lake Van. In particular at 189 ka, the brief expansion of temperate trees (deciduous *Quercus*, *Betula*) and grasses (Poaceae) combined with rapid variations in the fire intensity

(up to 6 000 particles cm<sup>-3</sup>, Fig. 3e), decreasing terrestrial input of soil material (Fig. 3d), and negative  $\delta^{18}\text{O}_{\text{bulk}}$  values (-0.2‰) point to short-term humid conditions and/or low evaporation within interstadials. Even if mean precipitation was low, the local available moisture was sufficient to sustain arboreal vegetation when low temperature minimized evaporation. Nevertheless, the landscape around the lake was still open due to still high percentages of dry-climate adapted herbs (e.g., *Chenopodiaceae*).

In contrast, the period after 157 ka BP shows a greater abundance of steppe elements with dwarf shrubs, grasses and other herbs (e.g., *Chenopodiaceae*, *Artemisia*, *Ephedra distachya*-type) along with lower temperate tree percentages (AP c. 1-8%). The remaining tree populations consist primarily of deciduous *Quercus*, *Pinus*, with some scattered patches of *Betula* and *Juniperus*. The combination of minor AP percentages, the predominance of steppe plants (Fig. 2b), and reduced fire activity reflect a strong aridification and cold continental climate during the late penultimate glacial. In addition, a general low-amplitude variation of  $\delta^{18}\text{O}_{\text{bulk}}$  values (c. -2 to 2‰; Fig. 3b) and an overall high local erosion processes (low Ca/K ratio; Fig. 3c) refer to a rather stable period with both widespread aridity (low winter and summer precipitation) and low winter temperature across eastern Anatolia.

The Lake Van record generally agrees with high-frequency paleoenvironmental variations in the ice-core archives, with high-resolution terrestrial European pollen records (e.g., Ioannina basin, Lake Ohrid; Fig. 5), and with the marine pollen sequences from the Iberian margin (Margari et al., 2010) in terms of extensive aridity and cooling throughout the penultimate glacial. Our sequence also shares some features with stable isotope speleothem records from western Israel (Peqi'in and Soreq Cave; Ayalon et al., 2002; Bar-Matthews et al., 2003) concerning high  $\delta^{18}\text{O}$  values that refer to dry climate conditions. Similar to the Lake Van  $\delta^{18}\text{O}_{\text{bulk}}$  values, the Soreq and Peqi'in record also show distinct climate variability, especially at the beginning of the MIS 6 (Fig. 5). In addition, several high-resolution terrestrial records document a further period of abrupt warming events between 155-150 ka BP. In particular, the Tenaghi Philippon profile illustrates a prominent increase of up to 60% in arboreal pollen, which coincides with increased rainfall at Yammoûneh (Gasse et al., 2015) and at Peqi'in Cave (Bar-Matthews et al., 2003). At Lake Van, only a weakened short-term oscillation can be detected in the Ca/K ratio during that time.

#### ***Comparison of the last two glacial intervals at Lake Van***

The occurrence of high-frequency climate changes within the Lake Van sediments provides an opportunity to compare the vegetation history of the last two glacial periods. Fig. 6 illustrates that the first part of the penultimate glacial (c. 193-157 ka) resembles MIS 3, regarding millennial-scale AP oscillations and abruptness of the transitions in the pollen record. The series of interstadial-stadial intervals can be recognized in both glacial periods. This variability is mainly influenced by the impact of North Atlantic current oscillations and the extension of atmospheric pattern, in particular, northward shift of the polar front

in eastern Anatolia (e.g., Cacho et al., 2000, 1999; Chapman and Shackleton, 1999; McManus et al., 1999; Rasmussen et al., 2014; Wolff et al., 2010).

The most distinct environmental variability occurred during MIS 6e (c. 179-159 ka), which can be further divided into six interstadials based on rapid changes in the marine core MD01-2444 off Portugal (Margari et al., 2010; Roucoux et al., 2011; Fig. 6). They document abrupt climate oscillations below orbital cycles similar to the Dansgaard-Oeschger (DO) events or Greenland Interstadials (GI) over the last glacial stage (e.g., Dansgaard et al., 1993; Rasmussen et al., 2014; Wolff et al., 2010). At Lake Van, the MIS 6e reveals a clear evidence of climate variability due to rapid alternation in abiotic and biotic proxies such as oxygen isotopes, Ca/K ratio, and pollen data similar to the largest DO 17 to 12 during MIS 3 (c. 60-44 ka BP; Pickarski et al., 2015b). Both intervals, MIS 6e and MIS 3, started at the point of summer insolation maxima. Here, the Northern Hemisphere insolation values reached interglacial level at the beginning of MIS 6e comparable with MIS 7e (Fig. 5). In contrast, the interstadial-stadial pattern during the late MIS 6 oscillated at lower amplitude, similar to rates of change in the Dansgaard-Oeschger (DO) events during MIS 4 and 2, reflecting a general global climatic cooling.

Within the MIS 6e, the subdued temperate tree pollen oscillations consist mainly of deciduous *Quercus* and *Pinus*, range between ~1 and 15%. In contrast, the identical AP composition oscillates between ~1 and 10% during the orbitally equivalent MIS 3 (c. 61-28 ka; Pickarski et al., 2015b). The different amplitude in arboreal pollen percentages in both glacial stages and a general dense temperate grass steppe during the MIS 6e suggest more available moisture (Fig. 6). Depleted isotope signature may result from summer meltwater discharge from local glaciers (e.g., Taurus mountains, Bitlis Massif) or by increased precipitation identified by climate modeling experiments over the eastern Mediterranean basin (e.g., Stockhecke et al., 2016). However, the presence of *Artemisia* and Poaceae makes it difficult to disentangle the effects of warming from changes in moisture availability in both glacials. Nevertheless, the abundance of *Pinus*, *Ephedra distachya*-type as well as the cold-tolerant algae *Pseudopediastrum kawraiskyi* indicates colder/wetter climate conditions during MIS 6e compared to MIS 3.

Evidence for relatively humid but cold climate conditions during MIS 6e agrees with several other paleoclimate studies from the Mediterranean area. For example, the occurrence of open forest vegetation associated with wetter climate is indicated at, e.g., Tenaghi Philippon (Tzedakis et al., 2006, 2003b) and Ioannina (Roucoux et al., 2011). In addition, isotopic evidence of the stalagmites record from the Soreq Cave (Israel) shows enhanced rainfall (negative shift in the  $\delta^{18}\text{O}$  values) in the eastern Mediterranean at ~177 ka and between 166-157 ka BP (Fig. 5; Ayalon et al., 2002; Bar-Matthews et al., 2003). Furthermore, a pluvial phase is also inferred from a prominent speleothem  $\delta^{18}\text{O}$  excursion in the Argentarola Cave (Italy) between 180 and 170 ka BP based on U/Th dating (Bard et al., 2002). This phase coincides with maximum rainfall conditions during MIS 6.5 event, coeval with the deposition of the ‘cold’ sapropel layer S6 (c. ~176 ka BP) in the western and eastern Mediterranean basin (Ayalon et al., 2002; Bard et al., 2002). Finally, the



progressive decline in effective moisture is a result of the combined effect of temperature, precipitation and insolation changes in the Lake Van region.

## 5. Conclusions

1. The new high-resolution Lake Van pollen record provides a unique sequence of the penultimate interglacial-glacial cycle in eastern Anatolia (broadly equivalent to the MIS 7 and MIS 6) that fills the gap in data coverage between the northern Levant and southern Europe. It reveals three steppe-forested intervals that can be correlated with MIS 7e, 7c, and 7a. Intervening periods of more open, herbaceous vegetation are correlated with MIS 7d and 7b.
2. During the penultimate interglacial complex, high local and regional effective soil moisture availability is evident by a well-developed temperate oak steppe-forest with pistachio and juniper, high charcoal accumulation, and reduced physical erosion during the climate optima.
3. In contrast to south-western Europe, all three terrestrial warm intervals of MIS 7 are characterized by clear interglacial conditions. The largest oak steppe-forest expansion in the Lake Van region within the penultimate interglacial complex occurred during the terrestrial equivalent of the MIS 7c instead of MIS 7e. This underlines the different environmental response to global climate change in the continental setting of the Near East compared to global ice volume and/or greenhouse gas.
4. The eastern Mediterranean Lake Van pollen sequence is in line with data from long-term climate records from southern Europe and the northern Levant, in terms of vegetation changes, orbitally-induced fluctuations, and atmospheric changes over the North Atlantic system. However, the diversity of tree taxa in the Lake Van pollen spectra seems to be rather low compared to southern European terrestrial interglacials and their forest development.
5. During the penultimate glacial, strong aridification and cold climate conditions are inferred from open desert-steppe vegetation that favors physical erosion and local terrigenous inputs. In particular, our record reveals high temperate oscillations between 193-157 ka BP, followed by a period of lower tree variations and the predominance of desert-steppe from 157-131 ka BP that highlighted Dansgaard-Oeschger-like events during the MIS 6.

**Data availability:** The complete pollen data set is available online on the PANGAEA database (<https://doi.org/10.1594/PANGAEA.871228>).

## Acknowledgements

Financial support was provided by the German Research Foundation (DFG; LI 582/20-1). We thank all colleagues and scientific teams who have been involved in the Lake Van drilling, core opening and sampling campaigns. We thank Dr. Nils Andersen and his working team at the Leibnitz-Laboratory for the isotopic

measurements. We acknowledge Vera Pospelova and Fabienne Marret-Davies for their help to identify dinoflagellate cysts. We thank Karen Schmeling for preparing excellent pollen samples, Christoph Steinhoff and Helen Böttcher for their support in the lab. Special thanks go to Ola Kwiecien and Georg Heumann for their critical reading of the manuscript and for the inspiring discussions. Patricia Pawlyk, as a native speaker, is thanked for proof reading the English. We are grateful to Miryam Bar-Matthews and Avner Ayalon from the Geological Survey of Israel (Jerusalem) for the supply of the oxygen isotope data of the Soreq and Peqi'in record. The authors are grateful to Nathalie Combourieu-Nebout for editing of the manuscript. Donatella Magri, Gonzalo Jiménez-Moreno and two anonymous reviewers are acknowledged for their constructive comments and useful recommendations, which improved the quality of the manuscript.

## References

- Altiner, Y., Söhne, W., Güney, C., Perl, J., Wang, R., Muzli, M., 2013. A geodetic study of the 23 October 2011 Van, Turkey earthquake. *Tectonophysics* 588, 118–134. doi:10.1016/j.tecto.2012.12.005
- Arranz-Otaegui, A., López-Sáez, J.A., Araus, J.L., Portillo, M., Balbo, A., Iriarte, E., Gourichon, L., Braemer, F., Zapata, L., Ibáñez, J.J., 2017. Landscape transformations at the dawn of agriculture in southern Syria (10.7–9.9 ka cal. BP): Plant-specific responses to the impact of human activities and climate change. *Quaternary Science Reviews* 158, 145–163. doi:10.1016/j.quascirev.2017.01.001
- Ayalon, A., Bar-Matthews, M., Kaufman, A., 2002. Climatic conditions during marine oxygen isotope stage 6 in the eastern Mediterranean region from the isotopic composition of speleothems of Soreq Cave, Israel. *Geology* 30, 303–306. doi:10.1130/0091-7613(2002)030<0303:CCDMOI>2.0.CO;2
- Bar-Matthews, M., Ayalon, A., Gilmour, M., Matthews, A., Hawkesworth, C.J., 2003. Sea–land oxygen isotopic relationships from planktonic foraminifera and speleothems in the Eastern Mediterranean region and their implication for paleorainfall during interglacial intervals. *Geochimica et Cosmochimica Acta* 67, 3181–3199. doi:10.1016/S0016-7037(02)01031-1
- Bard, E., Delaygue, G., Rostek, F., Antonioli, F., Silenzi, S., Schrag, D.P., 2002. Hydrological conditions over the western Mediterranean basin during the deposition of the cold Sapropel 6 (ca. 175 kyr BP). *Earth and Planetary Science Letters* 202, 481–494. doi:10.1016/S0012-821X(02)00788-4
- Barker, S., Knorr, G., Edwards, R.L., Parrenin, F., Putnam, A.E., Skinner, L.C., Wolff, E., Ziegler, M., 2011. 800,000 Years of Abrupt Climate Variability. *Science* 334, 347–351. doi:10.1126/science.1203580
- Bennett, K.D., Tzedakis, P.C., Willis, K.J., 1991. Quaternary refugia of north European trees. *Journal of Biogeography* 103–115. doi:10.2307/2845248
- Berger, A., 1978. Long-term variations of daily insolation and Quaternary climate changes. *Journal of Atmospheric Sciences* 35, 2362–2367. doi:10.1175/1520-0469(1978)035<2362:LTVODI>2.0.CO;2
- Berger, A., Louté, M.F., Kaspar, F., Lorenz, S.J., 2007. Insolation During Interglacial, in: Sirocko, F., Claussen, M., Sánchez Goñi, M.F., Litt, T. (Eds.), *The Climate of Past Interglacial*. Elsevier, Amsterdam, pp. 13–27.
- Berglund, B.E., Ralska-Jasiewiczowa, M., 1986. Pollen analysis and pollen diagrams, in: Berglund, B.E., Ralska-Jasiewiczowa, M. (Eds.), *Handbook of Holocene Palaeoecology and Palaeohydrology*. John Wiley and Sons, pp. 455–484.
- Beug, H.-J., 2004. *Leitfaden der Pollenbestimmung für Mitteleuropa und angrenzende Gebiete*. Pfeil, München.

- Cacho, I., Grimalt, J.O., Pelejero, C., Canals, M., Sierro, F.J., Flores, J.A., Shackleton, N., 1999. Dansgaard-Oeschger and Heinrich event imprints in Alboran Sea paleotemperatures. *Paleoceanography* 14, 698–705. doi:10.1029/1999PA900044
- Cacho, I., Grimalt, J.O., Sierro, F.J., Shackleton, N.J. s, Canals, M., 2000. Evidence for enhanced Mediterranean thermohaline circulation during rapid climatic coolings. *Earth and Planetary Science Letters* 183, 417–429. doi:10.1016/S0012-821X(00)00296-X
- Chapman, M.R., Shackleton, N.J., 1999. Global ice-volume fluctuations, North Atlantic ice-rafting events, and deep-ocean circulation changes between 130 and 70 ka. *Geology* 27, 795–798. doi:10.1130/0091-7613(1999)027<0795:GIVFNA>2.3.CO;2
- Dale, B., 2001. The sedimentary record of dinoflagellate cysts: looking back into the future of phytoplankton blooms. *Scientia Marina* 65, 257–272. doi:10.3989/scimar.2001.65s2257
- Dansgaard, W., Johnsen, S.J., Clausen, H.B., Dahl-Jensen, D., Gundestrup, N.S., Hammer, C.U., Hvidberg, C.S., Steffensen, J.P., Sveinbjörnsdottir, A.E., Jouzel, J., Bond, G., 1993. Evidence for general instability of past climate from a 250-kyr ice-core record. *Nature* 364, 218–220.
- Denton, G.H., Anderson, R.F., Toggweiler, J.R., Edwards, R.L., Schaefer, J.M., Putnam, A.E., 2010. The Last Glacial Termination. *Science* 328, 1652. doi:10.1126/science.1184119
- Desprat, S., Sánchez Goñi, M.F., Turon, J.-L., Duprat, J., Malaizé, B., Peyrouquet, J.-P., 2006. Climatic variability of Marine Isotope Stage 7: direct land–sea–ice correlation from a multiproxy analysis of a north-western Iberian margin deep-sea core. *Quaternary Science Reviews* 25, 1010–1026. doi:10.1016/j.quascirev.2006.01.001
- Eaton, E., Caudullo, G., Oliveira, S., de Rigo, D., 2016. *Quercus robur* and *Quercus petraea* in Europe: distribution, habitat, usage and threats, in: San-Miguel-Ayán, J., de Rigo, D., Caudullo, G., Houston Durrant, T., Mauri, A. (Eds.), *European Atlas of Forest Tree Species*. Publication Office of the European Union, Luxembourg, pp. 160–163.
- El-Moslimany, A., 1986. Ecology and late-Quaternary history of the Kurdo-Zagrosian oak forest near Lake Zeribar, western Iran. *Vegetatio* 68, 55–63. doi:10.1007/BF00031580
- Fægri, K., Iversen, J., 1989. *Textbook of Pollen Analysis*. The Blackburn Press.
- Follieri, M., Magri, D., Sadori, L., 1988. 250,000-year pollen record from Valle di Castiglione Roma. *Pollen et Spores* 30, 329–356.
- Frey, W., Kürschner, H., 1989. *Die Vegetation im Vorderer Orient. Erläuterungen zur Karte A VI 1 Vorderer Orient. Vegetation des “Tübinger Atlas des Vorderen Orients”.*, Reihe A. Tübinger Atlas des Vorderen Orients, Wiesbaden.
- Frogley, M.R., Tzedakis, P.C., Heaton, T.H.E., 1999. Climate Variability in Northwest Greece During the Last Interglacial. *Science* 285, 1886–1889. doi:10.1126/science.285.5435.1886
- Gasse, F., Vidal, L., Develle, A.-L., Van Campo, E., 2011. Hydrological variability in the Northern Levant: a 250 ka multiproxy record from the Yammoûneh (Lebanon) sedimentary sequence. *Climate of the Past* 7, 1261–1284. doi:10.5194/cp-7-1261-2011
- Gasse, F., Vidal, L., Van Campo, E., Demory, F., Develle, A.-L., Tachikawa, K., Elias, A., Bard, E., Garcia, M., Sonzogni, C., Thouveny, N., 2015. Hydroclimatic changes in northern Levant over the past 400,000 years. *Quaternary Science Reviews* 111, 1–8. doi:10.1016/j.quascirev.2014.12.019
- Giorgi, F., Lionello, P., 2008. Climate change projections for the Mediterranean region. *Global and Planetary Change* 63, 90–104. doi:10.1016/j.gloplacha.2007.09.005
- Huntley, B., Birks, H.J.B., 1983. *An Atlas of Past and Present Pollen Maps for Europe: 0-13,000 BP Yeras Ago*. Cambridge University Press, Cambridge.
- Jessen, A., Milthers, V., 1928. Stratigraphical and paleontological studies of interglacial freshwater deposits in Jutland and Northwest Germany. *Danmarks Geologiske Undersøgelse* 48, 1–379.
- Jouzel, J., Masson-Delmotte, V., Cattani, O., Dreyfus, G., Falourd, S., Hoffmann, G., Minster, B., Nouet, J., Barnola, J.M., Chappellaz, J., Fischer, H., Gallet, J.C., Johnsen, S., Leuenberger, M., Loulergue, L., Luethi, D., Oerter, H., Parrenin, F., Raisbeck, G., Raynaud, D., Schilt, A., Schwander, J., Selmo, E., Souchez, R., Spahni, R., Stauffer, B., Steffensen, J.P., Stenni, B., Stocker, T.F., Tison, J.L., Werner, M., Wolff, E.W., 2007. Orbital and Millennial Antarctic

- Climate Variability over the Past 800,000 Years. *Science* 317, 793–796.  
doi:10.1126/science.1141038
- Kwiecien, O., Stockhecke, M., Pickarski, N., Heumann, G., Litt, T., Sturm, M., Anselmetti, F., Kipfer, R., Haug, G.H., 2014. Dynamics of the last four glacial terminations recorded in Lake Van, Turkey. *Quaternary Science Reviews* 104, 42–52. doi:10.1016/j.quascirev.2014.07.001
- Lang, N., Wolff, E.W., 2011. Interglacial and glacial variability from the last 800 ka in marine, ice and terrestrial archives. *Climate of the Past* 7, 361–380. doi:10.5194/cp-7-361-2011
- Lemcke, G., Sturm, M., 1997.  $\delta$  18O and trace element measurements as proxy for the reconstruction of climate changes at Lake Van (Turkey): preliminary results., in: Dalfes, H.N., Kulka, G., Weiss, H. (Eds.), *Third Millennium BC Climate Change and Old World Collapse*. NATO ASI Series, pp. 653–679.
- Leng, M.J., Marshall, J.D., 2004. Palaeoclimate interpretation of stable isotope data from lake sediment archives. *Quaternary Science Reviews* 23, 811–831. doi:10.1016/j.quascirev.2003.06.012
- Lisiecki, L.E., Raymo, M.E., 2004. A Plio-Pleistocene Stack of 57 Globally Distributed Benthic  $\delta$  18O Records. *Paleoceanography* 20, 1–16.
- Litt, T., Anselmetti, F.S., 2014. Lake Van deep drilling project PALEOVAN. *Quaternary Science Reviews* 104, 1–7. doi:10.1016/j.quascirev.2014.09.026
- Litt, T., Anselmetti, F.S., Baumgarten, H., Beer, J., Çagatay, N., Cukur, D., Damci, E., Glombitza, C., Haug, G., Heumann, G., Kallmeyer, J., Kipfer, R., Krastel, S., Kwiecien, O., Meydan, A.F., Orcen, S., Pickarski, N., Randlett, M.-E., Schmincke, H.-U., Schubert, C.J., Sturm, M., Sumita, M., Stockhecke, M., Tomonaga, Y., Vigliotti, L., Wonik, T., team, the P. scientific, 2012. 500,000 Years of Environmental History in Eastern Anatolia: The PALEOVAN Drilling Project. *Scientific Drilling Journal* 18–29. doi:10.5194/sd-14-18-2012
- Litt, T., Krastel, S., Sturm, M., Kipfer, R., Örcen, S., Heumann, G., Franz, S.O., Ülgen, U.B., Niessen, F., 2009. “PALEOVAN”, International Continental Scientific Drilling Program (ICDP): site survey results and perspectives. *Quaternary Science Reviews* 28, 1555–1567. doi:10.1016/j.quascirev.2009.03.002
- Litt, T., Pickarski, N., Heumann, G., Stockhecke, M., Tzedakis, P.C., 2014. A 600,000 year long continental pollen record from Lake Van, eastern Anatolia (Turkey). *Quaternary Science Reviews* 104, 30–41. doi:10.1016/j.quascirev.2014.03.017
- Lowe, J.J., Walker, M.J.C., 1984. *Reconstructing Quaternary Environments*, 2nd ed. Longman, Edinburgh.
- Margari, V., Skinner, L.C., Tzedakis, P.C., Ganopolski, A., Vautravers, M., Shackleton, N.J., 2010. The nature of millennial-scale climate variability during the past two glacial periods. *Nature Geoscience* 3, 127–131. doi:10.1038/ngeo740
- Martinson, D.G., Pisias, N.G., Hays, J.D., Imbrie, J., Moore Jr., T.C., Shackleton, N.J., 1987. Age dating and the orbital theory of the ice ages: Development of a high-resolution 0 to 300,000-year chronostratigraphy. *Quaternary Research* 27, 1–29. doi:10.1016/0033-5894(87)90046-9
- McManus, J.F., Oppo, D.W., Cullen, J.L., 1999. A 0.5-Million-Year Record of Millennial-Scale Climate Variability in the North Atlantic. *Science* 283, 971–975. doi:10.1126/science.283.5404.971
- Milner, A.M., Müller, U.C., Roucoux, K.H., Collier, R.E.L., Pross, J., Kalaitzidis, S., Christanis, K., Tzedakis, P.C., 2013. Environmental variability during the Last Interglacial: a new high-resolution pollen record from Tenaghi Philippon, Greece. *Journal of Quaternary Science* 28, 113–117. doi:10.1002/jqs.2617
- Moore, P.D., Webb, J.A., Collinson, M.E., 1991. *Pollen Analysis*. Blackwell Science.
- NGRIP, 2004. High-resolution record of Northern Hemisphere climate extending into the last interglacial period. *Nature* 431, 147–151. doi:10.1038/nature02805
- Petit, J.R., Jouzel, J., Raynaud, D., Barkov, N.I., Barnola, J.-M., Basile, I., Bender, M., Chappellaz, J., Davis, M., Delaygue, G., Delmotte, M., Kotlyakov, V.M., Legrand, M., Lipenkov, V.Y., Lorius, C., Pepin, L., Ritz, C., Saltzman, E., Stievenard, M., 1999. Climate and atmospheric history of the past 420,000 years from the Vostok ice core, Antarctica. *Nature* 399, 429–436. doi:10.1038/20859

- Pickarski, N., Kwiecien, O., Djamali, M., Litt, T., 2015a. Vegetation and environmental changes during the last interglacial in eastern Anatolia (Turkey): a new high-resolution pollen record from Lake Van. *Palaeogeography, Palaeoclimatology, Palaeoecology* 145–158. doi:10.1016/j.palaeo.2015.06.015
- Pickarski, N., Kwiecien, O., Langgut, D., Litt, T., 2015b. Abrupt climate and vegetation variability of eastern Anatolia during the last glacial. *Climate of the Past* 11, 1491–1505. doi:10.5194/cp-11-1491-2015
- Punt, W., 1976. *The Northwest European Pollen Flora*. Elsevier, Amsterdam.
- Rasmussen, S.O., Bigler, M., Blockley, S.P., Blunier, T., Buchardt, S.L., Clausen, H.B., Cvijanovic, I., Dahl-Jensen, D., Johnsen, S.J., Fischer, H., Gkinis, V., Guillevic, M., Hoek, W.Z., Lowe, J.J., Pedro, J.B., Popp, T., Seierstad, I.K., Steffensen, J.P., Svensson, A.M., Vallelonga, P., Vinther, B.M., Walker, M.J.C., Wheatley, J.J., Winstrup, M., 2014. A stratigraphic framework for abrupt climatic changes during the Last Glacial period based on three synchronized Greenland ice-core records: refining and extending the INTIMATE event stratigraphy. *Quaternary Science Reviews* 106, 14–28. doi:10.1016/j.quascirev.2014.09.007
- Reilinger, R., McClusky, S., Vernant, P., Lawrence, S., Ergintav, S., Cakmak, R., Ozener, H., Kadirov, F., Guliev, I., Stepanyan, R., Nadariya, M., Hahubia, G., Mahmoud, S., Sakr, K., ArRajehi, A., Paradissis, D., Al-Aydrus, A., Prilepin, M., Guseva, T., Evren, E., Dmitrova, A., Filikov, S.V., Gomez, F., Al-Ghazzi, R., Karam, G., 2006. GPS constraints on continental deformation in the Africa-Arabia-Eurasia continental collision zone and implications for the dynamics of plate interactions. *Journal of Geophysical Research* 111, 1–26. doi:10.1029/2005JB004051
- Reille, M., 1999. *Pollen et spores d'Europe et d'Afrique du Nord*. Laboratoire de Botanique Historique et Palynologie, Marseille.
- Reille, M., 1998. *Pollen et spores d'Europe et d'Afrique du Nord (Supplement 2)*. Laboratoire de Botanique Historique et Palynologie, Marseille.
- Reille, M., 1995. *Pollen et spores d'Europe et d'Afrique du Nord (Supplement 1)*. Laboratoire de Botanique Historique et Palynologie, Marseille.
- Reille, M., de Beaulieu, J., Svobodova, H., Andrieu-Ponel, V., Goeury, C., 2000. Pollen analytical biostratigraphy of the last five climatic cycles from a long continental sequence from the Velay region (Massif Central, France). *Journal of Quaternary Science* 15, 665–685.
- Roberts, N., Jones, M.D., Benkaddour, A., Eastwood, W.J., Filippi, M.L., Frogley, M.R., Lamb, H.F., Leng, M.J., Reed, J.M., Stein, M., Stevens, L., Valero-Garcés, B., Zanchetta, G., 2008. Stable isotope records of Late Quaternary climate and hydrology from Mediterranean lakes: the ISOMED synthesis. *Quaternary Science Reviews* 27, 2426–2441. doi:10.1016/j.quascirev.2008.09.005
- Roucoux, K.H., Tzedakis, P.C., Frogley, M.R., Lawson, I.T., Preece, R.C., 2008. Vegetation history of the marine isotope stage 7 interglacial complex at Ioannina, NW Greece. *Quaternary Science Reviews* 27, 1378–1395. doi:10.1016/j.quascirev.2008.04.002
- Roucoux, K.H., Tzedakis, P.C., Lawson, I.T., Margari, V., 2011. Vegetation history of the penultimate glacial period (Marine isotope stage 6) at Ioannina, north-west Greece. *Journal of Quaternary Science* 26, 616–626. doi:10.1002/jqs.1483
- Sadori, L., Koutsodendris, A., Panagiotopoulos, K., Masi, A., Bertini, A., Combourieu-Nebout, N., Francke, A., Kouli, K., Joannin, S., Mercuri, A.M., Peyron, O., Torri, P., Wagner, B., Zanchetta, G., Sinopoli, G., Donders, T.H., 2016. Pollen-based paleoenvironmental and paleoclimatic change at Lake Ohrid (south-eastern Europe) during the past 500 ka. *Biogeosciences* 13, 1423–1437. doi:10.5194/bg-13-1423-2016
- Sánchez Goñi, M.F., Cacho, I., Turon, J.-L., Guiot, J., Sierro, F.J., Peypouquet, J.-P., Grimalt, J.O., Shackleton, N.J., 2002. Synchronicity between marine and terrestrial responses to millennial scale climatic variability during the last glacial period in the Mediterranean region. *Climate Dynamics* 19, 95–105. doi:DOI 10.1007/s00382-001-0212-x

- Sánchez Goñi, M.F., Eynaud, F., Turon, J.L., Shackleton, N.J., 1999. High resolution palynological record off the Iberian margin: direct land-sea correlation for the Last Interglacial complex. *Earth and Planetary Science Letters* 171, 123–137. doi:10.1016/S0012-821X(99)00141-7
- San-Miguel-Ayanz, J., de Rigo, D., Caudullo, G., Houston Durrant, T., Mauri, A., 2016. *European Atlas of Forest Tree Species*. Publication Office of the European Union, Luxembourg.
- Shackleton, N.J., Hall, M.A., Vincent, E., 2000. Phase relationships between millennial-scale events 64,000–24,000 years ago. *Paleoceanography* 15, 565–569. doi:10.1029/2000PA000513
- Shackleton, N.J., Sánchez-Goñi, M.F., Pailler, D., Lancelot, Y., 2003. Marine Isotope Substage 5e and the Eemian Interglacial. *THE EEMIAN INTERGLACIAL: A GLOBAL PERSPECTIVE* 36, 151–155. doi:10.1016/S0921-8181(02)00181-9
- Shumilovskikh, L.S., Tarasov, P., Arz, H.W., Fleitmann, D., Marret, F., Nowaczyk, N., Plessen, B., Schlütz, F., Behling, H., 2012. Vegetation and environmental dynamics in the southern Black Sea region since 18 kyr BP derived from the marine core 22-GC3. *Palaeogeography, Palaeoclimatology, Palaeoecology* 337–338, 177–193. doi:10.1016/j.palaeo.2012.04.015
- Stockhecke, M., Kwiecien, O., Vigliotti, L., Anselmetti, F.S., Beer, J., Çağatay, M.N., Channell, J.E.T., Kipfer, R., Lachner, J., Litt, T., Pickarski, N., Sturm, M., 2014a. Chronostratigraphy of the 600,000 year old continental record of Lake Van (Turkey). *Quaternary Science Reviews* 104, 8–17. doi:10.1016/j.quascirev.2014.04.008
- Stockhecke, M., Sturm, M., Brunner, I., Schmincke, H.-U., Sumita, M., Kipfer, R., Cukur, D., Kwiecien, O., Anselmetti, F.S., 2014b. Sedimentary evolution and environmental history of Lake Van (Turkey) over the past 600 000 years. *Sedimentology* 61, 1830–1861. doi:10.1111/sed.12118
- Stockhecke, M., Timmermann, A., Kipfer, R., Haug, G.H., Kwiecien, O., Friedrich, T., Menviel, L., Litt, T., Pickarski, N., Anselmetti, F.S., 2016. Millennial to orbital-scale variations of drought intensity in the Eastern Mediterranean. *Quaternary Science Reviews* 133, 77–95. doi:10.1016/j.quascirev.2015.12.016
- Stockmarr, J., 1971. Tablets with spores used in absolute pollen analysis. *Pollen et Spores* 13, 615–621.
- Thouveny, N., Carcaillet, J., Moreno, E., Leduc, G., Nérini, D., 2004. Geomagnetic moment variation and paleomagnetic excursions since 400 kyr BP: a stacked record from sedimentary sequences of the Portuguese margin. *Earth and Planetary Science Letters* 219, 377–396. doi:10.1016/S0012-821X(03)00701-5
- Turner, R., Roberts, N., Eastwood, W.J., Jenkins, E., Rosen, A., 2010. Fire, climate and the origins of agriculture: micro-charcoal records of biomass burning during the last glacial–interglacial transition in Southwest Asia. *Journal of Quaternary Science* 25, 371–386. doi:10.1002/jqs.1332
- Tzedakis, P.C., 2007. Seven ambiguities in the Mediterranean palaeoenvironmental narrative. *Quaternary Science Reviews* 26, 2042–2066. doi:10.1016/j.quascirev.2007.03.014
- Tzedakis, P.C., 2005. Towards an understanding of the response of southern European vegetation to orbital and suborbital climate variability. *Quaternary Science Reviews* 24, 1585–1599. doi:10.1016/j.quascirev.2004.11.012
- Tzedakis, P.C., 1994. Hierarchical biostratigraphical classification of long pollen sequences. *Journal of Quaternary Science* 9, 257–259. doi:10.1002/jqs.3390090306
- Tzedakis, P.C., Andrieu, V., de Beaulieu, J.-L., Birks, H.J.B., Crowhurst, S., Follieri, M., Hooghiemstra, H., Magri, D., Reille, M., Sadori, L., Shackleton, N.J., Wijmstra, T.A., 2001. Establishing a terrestrial chronological framework as a basis for biostratigraphical comparisons. *European Quaternary Biostratigraphy* 20, 1583–1592.
- Tzedakis, P.C., Andrieu, V., de Beaulieu, J.-L., Crowhurst, S., Follieri, M., Hooghiemstra, H., Magri, D., Reille, M., Sadori, L., Shackleton, N.J., Wijmstra, T.A., 1997. Comparison of terrestrial and marine records of changing climate of the last 500,000 years. *Earth and Planetary Science Letters* 150, 171–176.
- Tzedakis, P.C., Frogley, M.R., Heaton, T.H.E., 2003a. Last Interglacial conditions in southern Europe: evidence from Ioannina, northwest Greece. *Global and Planetary Change* 36, 157–170. doi:10.1016/S0921-8181(02)00182-0

- Tzedakis, P.C., Hooghiemstra, H., Palike, H., 2006. The last 1.35 million years at Tenaghi Philippon: revised chronostratigraphy and long-term vegetation trends. *Critical Quaternary Stratigraphy* 25, 3416–3430. doi:10.1016/j.quascirev.2006.09.002
- Tzedakis, P.C., Lawson, I.T., Frogley, M.R., Hewitt, G.M., Preece, R.C., 2002. Buffered Tree Population Changes in a Quaternary Refugium: Evolutionary Implications. *Science* 297, 2044–2047. doi:10.1126/science.1073083
- Tzedakis, P.C., McManus, J.F., Hooghiemstra, H., Oppo, D.W., Wijmstra, T.A., 2003b. Comparison of changes in vegetation in northeast Greece with records of climate variability on orbital and suborbital frequencies over the last 450 000 years. *Earth and Planetary Science Letters* 212, 197–212. doi:10.1016/S0012-821X(03)00233-4
- Van Zeist, W., Bottema, S., 1991. Late Quaternary vegetation of the Near East. *Beihefte zum Tübinger Atlas des Vorderen Orients* 18, 11–156.
- Vigliotti, L., Channell, J.E.T., Stockhecke, M., 2014. Paleomagnetism of Lake Van sediments: chronology and paleoenvironment since 350 ka. *Quaternary Science Reviews* 104, 18–29. doi:10.1016/j.quascirev.2014.09.028
- Walker, M., Johnsen, S., Rasmussen, S.O., Popp, T., Steffensen, J.P., Gibbard, P., Hoek, W., Lowe, J., Andrews, J., Björck, S., Cwynar, L.C., Hughen, K., Kershaw, P., Kromer, B., Litt, T., Lowe, D.J., Nakagawa, T., Newnham, R., Schwander, J., 2009. Formal definition and dating of the GSSP (Global Stratotype Section and Point) for the base of the Holocene using the Greenland NGRIP ice core, and selected auxiliary records. *J. Quaternary Sci.* 24, 3–17.
- Wick, L., Lemcke, G., Sturm, M., 2003. Evidence of Lateglacial and Holocene climatic change and human impact in eastern Anatolia: high resolution pollen, charcoal, isotopic and geochemical records from the laminated sediments of Lake Van. *The Holocene* 13, 665–675. doi:10.1191/0959683603hl653rp
- Wolff, E.W., Chappellaz, J., Blunier, T., Rasmussen, S.O., Svensson, A., 2010. Millennial-scale variability during the last glacial: The ice core record. *Quaternary Sciences Reviews* 29, 2828–2838. doi:10.1016/j.quascirev.2009.10.013
- Zohary, M., 1973. *Geobotanical Foundations of the Middle East*. Gustav Fischer Verlag, Swets & Zeitlinger. Stuttgart, Amsterdam.

## Figures

**Fig. 1:** Map of the eastern Mediterranean region showing major tectonic structures in Turkey. (a) Location of key Mediterranean and Near East pollen sites (stars) and speleothem records (triangle) mentioned in the text. (b) Bathymetry of Lake Van including the Ahlat Ridge drill site (AR, star). The black triangle indicates the positions of the active Nemrut and Süphan volcanoes. NAFZ: North Anatolian Fault Zone; EAFZ: East Anatolian Fault Zone; BS: Bitlis Suture.

**Fig. 2:** Pollen diagram inferred from Lake Van sediments plotted against composite depth (mcbf) and age (ka BP). (a) Selected arboreal pollen abundances are expressed as percentages and concentrations of the pollen sum (black curves), which excludes bryophytes, pteridophytes, and aquatic taxa. Rare taxa are summed and presented as ‘Other AP’. Selected arboreal pollen concentration (grains per cm<sup>3</sup>; red bars) is also given. Concentrations of green algae (*Pseudopediastrum boryanum*, *P. kawraiskyi*, coenobia per cm<sup>3</sup>; black bars), dinoflagellates (cysts per cm<sup>3</sup>; black bars), and charcoal particles (>20 µm, particles per cm<sup>3</sup>; black bars) are presented. (b) Selected pollen percentages diagram for non-arboreal taxa and key aquatic herbs (grey curves). Percentages and concentrations are calculated as for arboreal pollen. Rare taxa are summed as ‘Other NAP’.

Pollen assemblage superzones (PAS) and zones (PAZ, grey dashed lines) are indicated on the right and described in Table 2. Intervals characterized by oak steppe-forest (AP >30%) are marked in each diagram (grey box). An exaggeration of the pollen curves (x10; white curves) is used to show low variations in pollen percentages.

**Fig. 3:** Comparative study of Lake Van paleoenvironmental proxies during the penultimate interglacial-glacial cycle. (a) LR04 isotopic record (in ‰ VPDB) with Marine Isotope Stage (MIS) boundaries (grey bars) following Lisiecki and Raymo (2004); (b) Insolation values (40°N, Wm<sup>-2</sup>) after Berger (1978) and Berger et al. (2007); (c) Lake Van oxygen isotope record δ<sup>18</sup>O<sub>bulk</sub> (‰ VPDB; new analyzed isotope data including the already published isotope record by Kwiecien et al., 2014); (d) Calcium/potassium ratio (Ca/K) after Kwiecien et al. (2014); (e) Fire intensity at Lake Van (>20 µm, charcoal concentration in particles cm<sup>-3</sup>); (f) Selected tree percentages (total arboreal pollen (AP), deciduous *Quercus*, and *Pinus*) including the pollen data from Litt et al. (2014). PAZ – Pollen assemblage zone. Termination III at 250 ka, TIIIA at 223 ka and TII at 136 ka are indicated after Barker et al. (2011) and Stockhecke et al. (2014a).

**Fig. 4:** Comparison of (a) current interglacial (MIS 1; Litt et al., 2009) with (b) last interglacial (MIS 5e; Pickarski et al., 2015a), and (c) penultimate interglacial complex (MIS 7; this study) at Lake Van. Shown is the insolation values (40°N, Wm<sup>-2</sup>) after Berger (1978) and Berger et al. (2007), the Lake Van arboreal pollen (AP) concentration (grains cm<sup>-3</sup>, brown line), and the Lake Van paleovegetation (AP, deciduous



*Quercus*, and *Pinus* in %). The grey boxes mark each steppe-forest intervals. Marine Isotope Stage (MIS; Lisiecki and Raymo, 2004) and the length of each interglacial (MIS 5e, 7a, 7c, and 7e, black arrows) are indicated.

**Fig. 5:** Comparison of Lake Van pollen archive with terrestrial, marine and ice core paleoclimatic sequences on their own timescales. (a) Total arboreal pollen (AP %) and deciduous *Quercus* curve from Lake Van (this study); (b) Arboreal pollen percentages from Yammouneh basin (Lebanon; Gasse et al., 2015); (c) AP including (green) and excluding (light green) *Pinus* and *Juniperus* (PJ) percentages of the Tenaghi Philippon record (NE Greece; Tzedakis et al., 2003b); (d) AP sequence from Ioannina basin including (orange) and excluding (light orange) *Pinus*, *Juniperus*, and *Betula* (PJB) (NW Greece; Roucoux et al., 2011, 2008); (e) Lake Ohrid pollen record (AP %; Macedonia, Albania; Sadori et al., 2016); (f) Stable oxygen isotope record of Lake Van ( $\delta^{18}\text{O}_{\text{bulk}}$  data including the already published isotope record of Kwiecien et al., 2014); (g) Peqi'in and Soreq Cave speleothem records (Israel; M. Bar-Matthews & A. Ayalon, unpubl. data); (h) Synthetic Greenland ice-core record ( $\text{GL}_{\text{T-syn}}$ ; Barker et al., 2011); (i) Atmospheric  $\text{CO}_2$  concentration from Vostok ice core, Antarctica (Petit et al., 1999); (j) Mid-June and Mid-January insolation for  $40^\circ\text{N}$  (Berger, 1978; Berger et al., 2007). Bands highlights periods of distinctive climate signature discussed in the text. Black dots mark significant interstadial periods. Marine Isotope Stages is also shown (MIS; Lisiecki and Raymo, 2004). Termination III at 250 ka, TIIIA at 223 ka and TII at 136 ka after Barker et al. (2011) and Stockhecke et al. (2014a).

**Fig. 6:** Comparison of the (a) last glacial period (MIS 4-2; Pickarski et al., 2015b) with the (b) penultimate glacial (this study) characteristics at Lake Van. Shown is the insolation values ( $40^\circ\text{N}$ ,  $\text{Wm}^{-2}$ ) after Berger (1978) and Berger et al. (2007), the  $\delta^{18}\text{O}$  profile from NGRIP ice core (Greenland; NGRIP members, 2004) labeled with Dansgaard-Oeschger (DO) events 1 to 19 for the last glacial period, the  $\delta^{18}\text{O}$  composition of benthic foraminifera of the marine core MD01-2444 (Portuguese margin; Margari et al., 2010) for the penultimate glacial, and the Lake Van paleovegetation with AP % (shown in black), AP in 10-fold exaggeration (grey line), Poaceae, deciduous *Quercus*, and *Pinus*. The grey boxes mark the comparison between the different paleoenvironmental records of pronounced interstadial oscillations. Marine Isotope Stage (MIS; Lisiecki and Raymo, 2004) and informally numbered interstadials of the MD01-2444 record are indicated (Margari et al., 2010).

**Tables:**

**Table 1:** Present-day climate data at Lake Van (see Fig. 1 for the location). Data were provided by the Turkish State Meteorological Service (observation period: 1975-2008).

| Station | Coordinates   |                |                  | Mean temperature (°C) |      |      | Mean precipitation (mm) |      |      |
|---------|---------------|----------------|------------------|-----------------------|------|------|-------------------------|------|------|
|         | Latitude (°N) | Longitude (°E) | Altitude (m asl) | Jan.                  | July | Year | Jan.                    | July | Year |
| Bitlis  | 38°24'        | 42°06'         | 1551             | -2.0                  | 22.0 | 9.4  | 161                     | 5    | 1232 |
| Tatvan  | 38°30'        | 42°17'         | 1690             | -3.2                  | 21.9 | 8.7  | 95                      | 7    | 816  |
| Erciş   | 39°20'        | 43°22'         | 1750             | -6.0                  | 21.8 | 7.7  | 31                      | 7    | 421  |
| Van     | 38°27'        | 43°19'         | 1661             | -4.0                  | 22.2 | 9.0  | 35                      | 4    | 385  |

**Table 2:** Main palynological characteristics of the Lake Van pollen assemblage superzones (PAS) and zones (PAZ) with composite depth (mcbf), age (ka BP), criteria for lower boundary, components of the pollen assemblage (AP: arboreal pollen, NAP: non-arboreal pollen), green algae concentration (GA: low <1000; high >1000 coenobia cm<sup>-3</sup>), dinoflagellates concentrations (DC: low <100; high >100 cysts cm<sup>-3</sup>), charcoal concentrations (CC: low <2000; moderate 2000-4000; high >4000 particles cm<sup>-3</sup>) and their inferred dominated vegetation type during the penultimate interglacial-glacial cycle. Marine Isotope Stages (MIS) after Lisiecki and Raymo (2004) were shown on the right.
